# Supplementary material for: Temporal trends of COVID-19 mortality and hospitalisation rates: an observational cohort study from the US Department of Veterans Affairs
Source: PubMed Central journal article supplement — BMJ Open. 2021 Aug 16;11(8):e047369. doi: 10.1136/bmjopen-2020-047369 (PMC8370839; doi:10.1136/bmjopen-2020-047369), 2021-08-16
Supplement: bmjopen-2020-047369.draft_revisions.pdf [file bmjopen-2020-047369.draft_revisions.pdf]

# BMJ Open

BMJ Open is committed to open peer review. As part of this commitment we make the peer review history of every article we publish publicly available.

When an article is published we post the peer reviewers' comments and the authors' responses online. We also post the versions of the paper that were used during peer review. These are the versions that the peer review comments apply to.

The versions of the paper that follow are the versions that were submitted during the peer review process. They are not the versions of record or the final published versions. They should not be cited or distributed as the published version of this manuscript.

BMJ Open is an open access journal and the full, final, typeset and author-corrected version of record of the manuscript is available on our site with no access controls, subscription charges or pay-per-view fees (<http://bmjopen.bmj.com>).

If you have any questions on BMJ Open's open peer review process please email [info.bmjopen@bmj.com](mailto:info.bmjopen@bmj.com)

# BMJ Open

## Temporal Trends of COVID-19 Mortality and Hospitalization Rates: An observational cohort study from the US Department of Veterans Affairs

|                               |                                                                                                                                                                                                                                                                                                                        |
|-------------------------------|------------------------------------------------------------------------------------------------------------------------------------------------------------------------------------------------------------------------------------------------------------------------------------------------------------------------|
| Journal:                      | <i>BMJ Open</i>                                                                                                                                                                                                                                                                                                        |
| Manuscript ID                 | bmjopen-2020-047369                                                                                                                                                                                                                                                                                                    |
| Article Type:                 | Original research                                                                                                                                                                                                                                                                                                      |
| Date Submitted by the Author: | 29-Nov-2020                                                                                                                                                                                                                                                                                                            |
| Complete List of Authors:     | Cai, Miao; Saint Louis University, Department of Epidemiology & Biostatistics<br>Bowe, Benjamin; Saint Louis University, Epidemiology and Biostatistics<br>Xie, Yan; VA Saint Louis Health Care System, Clinical Epidemiology Center<br>Al-Aly, Ziyad; VA Saint Louis Health Care System, Clinical Epidemiology Center |
| Keywords:                     | COVID-19, Epidemiology < INFECTIOUS DISEASES, GENERAL MEDICINE (see Internal Medicine)                                                                                                                                                                                                                                 |
|                               |                                                                                                                                                                                                                                                                                                                        |

SCHOLARONE™  
Manuscripts

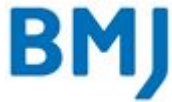

I, the Submitting Author has the right to grant and does grant on behalf of all authors of the Work (as defined in the below author licence), an exclusive licence and/or a non-exclusive licence for contributions from authors who are: i) UK Crown employees; ii) where BMJ has agreed a CC-BY licence shall apply, and/or iii) in accordance with the terms applicable for US Federal Government officers or employees acting as part of their official duties; on a worldwide, perpetual, irrevocable, royalty-free basis to BMJ Publishing Group Ltd ("BMJ") its licensees and where the relevant Journal is co-owned by BMJ to the co-owners of the Journal, to publish the Work in this journal and any other BMJ products and to exploit all rights, as set out in our [licence](#).

The Submitting Author accepts and understands that any supply made under these terms is made by BMJ to the Submitting Author unless you are acting as an employee on behalf of your employer or a postgraduate student of an affiliated institution which is paying any applicable article publishing charge ("APC") for Open Access articles. Where the Submitting Author wishes to make the Work available on an Open Access basis (and intends to pay the relevant APC), the terms of reuse of such Open Access shall be governed by a Creative Commons licence – details of these licences and which [Creative Commons](#) licence will apply to this Work are set out in our licence referred to above.

Other than as permitted in any relevant BMJ Author's Self Archiving Policies, I confirm this Work has not been accepted for publication elsewhere, is not being considered for publication elsewhere and does not duplicate material already published. I confirm all authors consent to publication of this Work and authorise the granting of this licence.

1  
2  
3 **Temporal Trends of COVID-19 Mortality and Hospitalization Rates: An observational**  
4  
5 **cohort study from the US Department of Veterans Affairs**  
6  
7

8 **Miao Cai<sup>a,b</sup>, PhD; Benjamin Bowe<sup>a,b,c</sup>, MPH; Yan Xie<sup>a,b,c</sup>, MPH; and Ziyad Al-Aly<sup>a,b,d,e,f</sup> MD**  
9

10 <sup>a</sup> Clinical Epidemiology Center, Research and Development Service, VA Saint Louis Health  
11 Care System, Saint Louis, Missouri  
12

13  
14 <sup>b</sup> Veterans Research & Education Foundation of St. Louis, Saint Louis, Missouri  
15

16  
17 <sup>c</sup> Department of Epidemiology and Biostatistics, College for Public Health and Social Justice,  
18 Saint Louis University, Saint Louis, Missouri  
19

20 <sup>d</sup> Department of Medicine, Washington University School of Medicine, Saint Louis, Missouri  
21

22 <sup>e</sup> Nephrology Section, Medicine Service, VA Saint Louis Health Care System,  
23 Saint Louis, Missouri  
24

25 <sup>f</sup> Institute for Public Health, Washington University in Saint Louis, Saint Louis, Missouri  
26  
27

28  
29 **Running title: Temporal Trends in COVID-19 Mortality and Hospitalization**  
30

31  
32 **Conflict of Interest Disclosures:** None.  
33

34 **Funding:** This study was funded by the United States Department of Veterans Affairs (grant  
35 number 1I21HX002995-01A1).  
36  
37

38  
39 **Word count: 2875**  
40 **Tables & Figures: 5**  
41

42  
43 **Corresponding Author:**

44 Ziyad Al-Aly, M.D.  
45 VA Saint Louis Health Care System  
46 915 North Grand Boulevard, 151-JC  
47 Saint Louis, MO 63106  
48 Telephone: (314) 289-6333  
49

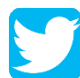

Twitter [@zalaly](https://twitter.com/zalaly)

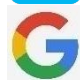

Email: [zalaly@gmail.com](mailto:zalaly@gmail.com)  
54  
55  
56  
57  
58  
59  
60

## Abstract

**Objective:** To investigate the temporal trends of 30-day mortality and hospitalization in United States Veterans with COVID-19 and 30-day mortality in hospitalized Veterans with COVID-19; and to decompose the contribution of changes in the underlying characteristics of affected populations to these temporal changes.

**Design:** Observational cohort study.

**Setting:** US Department of Veteran Affairs.

**Participants:** 49 238 United States Veterans with a positive COVID-19 test between March 20, 2020 and September 19, 2020; and 9 428 United States Veterans hospitalized with a positive COVID-19 test during the same period.

**Outcome measures:** 30-day mortality rate and hospitalization rate.

**Results:** Between March 20, 2020 and September 19, 2020 and in COVID-19 positive individuals, 30-day mortality rate dropped by 9.2% from 13.6% to 4.4%; hospitalization rate dropped by 16.8% from 33.8% to 17.0%. In hospitalized COVID-19 individuals, 30-day mortality rate dropped by 12.7% from 23.5% to 10.8%. Among COVID-19 positive individuals, decomposition analyses suggested that changes in demographic, health and contextual characteristics, COVID-19 testing capacity, and hospital occupancy accounted for 40.2% and 33.3% of the decline in 30-day mortality and hospitalization, respectively. Changes in the underlying characteristics of hospitalized COVID-19 individuals accounted for 29.9% of the decline in 30-day mortality.

1  
2  
3 **Conclusion:** Between March and September 2020, changes in demographic and health  
4 characteristics of people infected with COVID-19 contributed measurably to the substantial  
5 decline in 30-day mortality and hospitalization.  
6  
7  
8  
9  
10  
11  
12

### 13 **Strengths and limitations of the study**

- 14  
15  
16 • National large-scale individual-level data from the US Department of Veterans Affairs  
17 which operated the largest integrated health care system in the United States.
- 18  
19  
20 • Advanced decomposition methods disentangle the influence of changes in  
21 demographics and health characteristics on temporal trends of 30-day mortality and  
22 hospital rates.  
23  
24  
25  
26  
27 • The study accounted for important but less studied drivers of change in mortality and  
28 hospitalization including contextual variables, testing capacity, and hospital occupancy  
29 rates.  
30  
31  
32  
33  
34 • The Veteran population includes mostly older White males, which may limit the  
35 generalizability.  
36  
37  
38  
39  
40  
41  
42  
43  
44  
45  
46  
47  
48  
49  
50  
51  
52  
53  
54  
55  
56  
57  
58  
59  
60

## Introduction

Reports from regional health systems and the Center of Disease Control suggest substantial temporal variations in COVID-19 mortality rates<sup>1-3</sup>; however, a national temporal analysis of mortality and hospitalization rates accounting for individual-level characteristics is lacking and the relative contribution of changes in demographic and health characteristics of people infected with COVID-19 to temporal differences in mortality rates is not clear.

A deeper understanding of the changes in hospitalization and mortality rates and the drivers of such changes in the first wave of the pandemic will aid effort to optimize management of future waves of this global pandemic.

In this work, we leveraged the breadth and depth of the United States Department of Veterans Affairs electronic health care databases to describe temporal changes in mortality rates and hospitalization among COVID-19 positive Veterans, and temporal changes in mortality rates of hospitalized veterans with COVID-19. We then decomposed the contribution of changes in demographic, health, contextual characteristics to these temporal changes.

## Methods

### ***Identification of COVID-19 test positive individuals***

Using the comprehensive COVID-19 Shared Data Resource (CSDR)<sup>4</sup> developed by the Department of Veterans Affairs (VA), we identified unique US Veterans with their first laboratory confirmed COVID-19 positive test between March 20, 2020 and September 19, 2020. The CSDR captures COVID-19 cases based on laboratory results that comply with

Centers for Disease Control and Prevention standards, including 2019-nCoV RT-PCR (reverse transcription-polymerase chain reaction) Diagnostic Panel and the SARS-CoV-2 Multiplex Assay, or human-confirmed case review<sup>4</sup>. The VA had its first COVID-19 positive patient on March 02, 2020. In this study, March 20, 2020 was selected as the first day of observation where it was the first day that VA had more than 100 COVID-19 positive patients nationally, facilitating stabilization of rate calculations. September 19, 2020 was selected as the last day of observation to ensure 30 days of follow-up for observation of outcomes.

### **Data sources**

Data were obtained from the VA CSDR<sup>4</sup> and Corporate Data Warehouse (CDW)<sup>5-17</sup>, which provides electronic health record information during routine healthcare. Demographic information and dates of death were collected from the CDW SPatient domain. Patient clinical diagnoses, procedures, and hospitalization characteristics were obtained from the CDW Outpatient Encounter and Inpatient Encounter domains. Smoking status was obtained from the CDA Health Factors domain. Laboratory results, including serum creatinine, were obtained from the CDW Patient Laboratory Chemistry domain. Data on height, weight, and blood pressure were procured from the CDW Vital Signs domain. The CDW Outpatient Pharmacy domain was used to obtain diabetes medication data. The Planning System Support Group Enrollee provided the Federal Information Processing Standard (FIPS) code of residence. The 2015 Area Deprivation Index (ADI) were obtained from the University of Wisconsin. The ADI is a composite measure of a census block group's socio-economic disadvantage, and is constructed from data elements including education, employment, housing quality, and poverty measures<sup>18</sup>.

### **Outcomes**



1  
2  
3 We examined the temporal trends in a) rates of 30-day mortality and hospitalization among  
4 those with a positive COVID-19 test, and b) rates of 30-day mortality among those hospitalized  
5 with COVID-19. 30-day mortality was defined as all-cause mortality occurring within the 30  
6 days after the participant's first COVID-19 positive test. Hospitalization is defined by a hospital  
7 admission between 5 days before and 30 days after the first COVID-19 positive test.  
8  
9  
10  
11  
12  
13

### 14 ***Participant characteristics***

15  
16  
17  
18 Race was categorized as White, Black, and other. Health features included body weight index  
19 (BMI) and smoking status. BMI was computed from the last measurements of the participant's  
20 height and weight prior and closest to the first COVID-19 positive test date. Smoking status  
21 was categorized as never smoker, former smoker, and current smoker, based on the most  
22 recent record prior to the first COVID-19 positive test. Comorbidities included cancer,  
23 cardiovascular disease, cerebrovascular disease, chronic kidney disease, chronic obstructive  
24 pulmonary disease (COPD), dementia, diabetes mellitus, human immunodeficiency virus  
25 (HIV), hypertension, peripheral artery disease, and pneumonia. Cancer, cardiovascular  
26 disease, cerebrovascular disease, dementia, HIV, peripheral artery disease, pneumonia, and  
27 COPD were identified in the two years prior to testing positive for COVID-19 through  
28 International Classification of Diseases Tenth Version Clinical Modification diagnosis codes.  
29  
30  
31  
32  
33  
34  
35  
36  
37  
38  
39  
40  
41  
42  
43  
44  
45  
46  
47  
48  
49  
50  
51  
52  
53  
54  
55  
56  
57  
58  
59  
60

Chronic kidney disease was defined as baseline estimated glomerular filtration rate (eGFR) lower than 60 mL/min/1.73m<sup>2</sup>. Baseline eGFR was calculated using the CKD-EPI equation<sup>19</sup> and was assessed as the Veteran's last outpatient value prior to the date of first COVID-19 test positive. Participants who had no measurement of baseline eGFR (N=5 447, 11.1% for Veterans with COVID-19; N=717, 7.6% for hospitalized Veterans with COVID-19) were assumed to have no chronic kidney disease. Diabetes was defined as any use of

1  
2  
3 antihyperglycemic medications<sup>20-23</sup> or incidence of hemoglobin A1C greater or equal to  
4  
5 6.5%.<sup>24</sup> Hypertension was defined as median systolic blood pressure greater than or equal to  
6  
7 130 mmHg or median diastolic blood pressure greater than or equal to 80 mmHg in one year.  
8  
9  
10 <sup>25</sup> Participants who had no measurement of blood pressure (N=2 699, 5.5% for Veterans with  
11  
12 COVID-19; N=235, 2.5% for hospitalized Veterans with COVID-19) were assumed to have no  
13  
14 chronic kidney disease. ADI is a composite measure of a geographic location's socio-  
15  
16 economic disadvantage, and ranges from 0 (low disadvantage) to 100 (high disadvantage).  
17  
18 County level ADI of the participants was assigned based on the participant's FIPS code of  
19  
20 residence location at the first COVID-19 positive test date. Mean imputation was applied to  
21  
22 missing values of covariates including BMI (missing = 111, 0.2% of Veterans with COVID-19;  
23  
24 missing = 11, 0.1% of hospitalized Veterans with COVID-19) and ADI (missing = 1303, 2.6% of  
25  
26 Veterans with COVID-19; missing = 88, 1.0% of hospitalized Veterans with COVID-19).  
27  
28 COVID-19 testing capacity was calculated as 7-day averages of the number of COVID-19 tests  
29  
30 conducted in a hospital system divided by the total number of veterans served in that hospital  
31  
32 system in the last calendar year. Hospital occupancy was defined as the percentage of beds  
33  
34 occupied by hospitalized patients in a hospital system within a calendar week. COVID-19  
35  
36 testing capacity and hospital occupancy were linked to the Veterans by the hospital system in  
37  
38 which the individuals had their first positive COVID-19 test.  
39  
40  
41  
42  
43  
44

### 45 ***Statistical analyses***

46  
47  
48 We calculated and plotted 7-day moving averages of crude and standardized 30-day mortality  
49  
50 and hospitalization rates in COVID-19 positive participants, as well as 30-day mortality rates in  
51  
52 hospitalized COVID-19 positive participants. The 7-day range included the current day, and the  
53  
54 three days before and after. Standardized rates were adjusted for age, race, gender, health  
55  
56  
57  
58  
59

1  
2  
3 behaviors (smoking status and BMI), comorbidities, and ADI through indirect standardization  
4  
5 <sup>26</sup>. The standardization was based on the ratio difference between expected and observed  
6  
7 number of outcomes, where expected number of outcomes were estimated from individual-  
8  
9 level logistic regressions.  
10  
11

12  
13 To understand driving factors of the temporal trends in the outcomes, we decomposed the  
14  
15 contribution of the changes in key participant characteristics to changes in the observed rates  
16  
17 of outcomes over time. We first constructed individual-level logistic regression models for the  
18  
19 different outcomes using four sets of factor domains: demographics (age, race, gender), health  
20  
21 characteristics (BMI, diabetes, cancer, cardiovascular disease, cerebrovascular disease,  
22  
23 chronic kidney disease, dementia, HIV, hypertension, peripheral artery disease, pneumonia,  
24  
25 and smoking status), contextual factors (ADI), COVID-19 testing capacity, and hospital  
26  
27 occupancy. Hospital occupancy rate was not included as a predictor of hospitalization since  
28  
29 they are measuring the same variable. For each individual, we then computed the expected  
30  
31 probabilities of the outcome based on a participant's observed characteristics and under a  
32  
33 reference characteristics set, where probability of the outcome was minimized (age was set as  
34  
35 zero, and other categorical variables were set to be the reference group). We estimated the  
36  
37 additive contribution of the six sets of factor domains to the estimated rates of the outcome  
38  
39 using decomposition analysis<sup>27</sup>. Then the change in outcome rates between the first (March 20  
40  
41 to April 19) and the last (August 20 to September 19) 30 day periods associated with each  
42  
43 domain were calculated by taking the difference of the contributions between the two periods.  
44  
45  
46  
47  
48  
49  
50 All statistical tests were two sided, and a p-value less than 0.05 or a 95% confidence interval  
51  
52 that did not contain unity was considered statistically significant. Statistical analyses and data  
53  
54 visualization were performed using SAS Enterprise Guide version 7.1 (SAS Institute, Cary,  
55  
56  
57  
58  
59  
60

1  
2  
3 NC) and R 4.0.2<sup>28</sup>. The participants were not involved in the design, or conduct, or reporting, or  
4  
5 dissemination plans of the study. The study was approved by the Institutional Review Board of  
6  
7 the Department of Veterans Affairs St Louis Health Care System, St Louis, MO.  
8  
9

## 10 **Patient and public involvement**

11  
12  
13 This research was done without patient and public involvement.  
14  
15  
16  
17  
18

## 19 **Results**

20  
21  
22 Between March 20, 2020 and September 19, 2020, we identified 49 238 US Veterans who  
23  
24 tested positive for COVID-19 and 9 428 US Veterans hospitalized with COVID-19.  
25  
26

27 Characteristics of the two cohorts are reported in Table 1. Among individuals with COVID-19,  
28  
29 the median age was 63.3 years (interquartile range [IQR], 49.8 to 73.1 years); 60.6% were  
30  
31 White, 33.9% were Black, and 11.5% were women. Among hospitalized individuals, the  
32  
33 median age was 70.6 years (IQR 61.2 to 76.8 years), 53.6% were White, 40.4% were Black,  
34  
35 and 6.0% were women.  
36  
37  
38

## 39 **Temporal trends in 30-day mortality and hospitalization rates**

40  
41  
42 Between March 20, 2020 and September 19, 2020 and among individuals with a COVID-19  
43  
44 positive test the 30-day mortality rate dropped by 9.2% from 13.6% to 4.4%; the hospitalization  
45  
46 rate dropped by 16.8% from 33.8% to 17.0% (Table 2 and Figure 1). Among hospitalized  
47  
48 individuals with COVID-19, the 30-day mortality rate dropped by 12.7% from 23.5% to 10.8%  
49  
50 (Table 2 and Figure 1). After accounting for demographics, contextual factors, health  
51  
52  
53  
54  
55  
56  
57  
58  
59  
60

1  
2  
3 characteristics, COVID-19 testing capacity, and hospital occupancy, standardized rates  
4  
5 showed consistent decline during the period (Figure 1).  
6  
7

8  
9 Between March 20, 2020 and September 19, 2020 and among hospitalized individuals with  
10  
11 COVID-19, we observed consistent decline in healthcare resource utilization including decline  
12  
13 in rates of intensive care unit (ICU) admission, mechanical ventilator use, and length of  
14  
15 hospital stay (Supplemental Table 1). The rate of ICU stay dropped by 4% from 35.6% to  
16  
17 31.6%; the rate of mechanical ventilator use dropped by 11.3% from 20.6% to 9.3%; the mean  
18  
19 length of stay dropped by 4.2 days from 13.8 to 9.6 days.  
20  
21

### 22 23 **Predictors of 30-day mortality and hospitalization**

24  
25  
26 Adjusted odds ratios for the association between potential predictors and risk of 30-day  
27  
28 mortality and hospitalization among Veterans with COVID-19, as well as risk of 30-day  
29  
30 mortality among hospitalized Veterans with COVID-19 are presented in Table 3. Among  
31  
32 Veterans with COVID-19, older age, Black and other race, male gender, current smoker,  
33  
34 diabetes, cancer, cardiovascular disease, dementia, chronic kidney disease, pneumonia,  
35  
36 COPD, and higher hospital occupancy rate were associated with higher risk of 30-day mortality  
37  
38 and hospitalization; higher COVID-19 testing capacity was associated with lower risk of 30-day  
39  
40 mortality and hospitalization. Among hospitalized Veterans with COVID-19, older age, male  
41  
42 gender, obesity, current smoker, diabetes, cardiovascular disease, chronic kidney disease,  
43  
44 dementia, and higher hospital occupancy rate were associated with higher risk of 30-day  
45  
46 mortality; higher COVID-19 testing capacity was associated with lower risk of 30-day mortality.  
47  
48  
49 The models for 30-day mortality and hospitalization among those who tested positive, and the  
50  
51 model for 30-day mortality among hospitalized achieved reasonably good predictive  
52  
53 performance, with the c-statistics of 0.834, 0.718, and 0.746, respectively. The c-statistics for  
54  
55  
56  
57  
58  
59  
60

1  
2  
3 nested models, showing the predictive performance improvement when adding different  
4  
5 variable sets, are included in Supplemental Table 2.  
6  
7

### 8 **Temporal change of predictors of 30-day mortality and hospitalization**

9

10  
11 The demographic, health, and contextual characteristics as well as hospital occupancy and  
12  
13 testing capacity in each 30-day interval between March 20, 2020 and September 19, 2020 are  
14  
15 described in Figure 2A and 2B and Supplemental Table 3A and 3B. We observed substantial  
16  
17 decline in percent of Black patients over time in both individuals with COVID-19 (from 47.2% to  
18  
19 25.5%, dropping by 21.7%) and hospitalized individuals with COVID-19 (from 54.4% to 28.2%,  
20  
21 dropping by 26.3%). The prevalence of comorbidities was consistently dropping between the  
22  
23 two period in individuals with COVID-19; the overall trend of comorbidity prevalence was still  
24  
25 declining while less consistent in hospitalized individuals with COVID-19. In both of two cohorts  
26  
27 over time, the percent of individuals living in disadvantaged neighborhood (higher ADI) and  
28  
29 COVID-19 testing capacity were increasing, while hospital occupancy was decreasing.  
30  
31  
32  
33  
34

### 35 **The contribution of changes in predictors to temporal changes in 30-day mortality and** 36 37 **hospitalization rates**

38  
39

40  
41 Decomposition analyses showed that from March 20, 2020 to September 19, 2020 and among  
42  
43 COVID-19 positive individuals, changes in demographics, health characteristics, and  
44  
45 contextual characteristics, expansion of testing capacity, and decreasing hospital occupancy  
46  
47 contributed to 26.1%, 7.6%, 5.4%, -1.1%, and 2.2% of the decline in 30-day mortality rates  
48  
49 respectively. Altogether, these predictors accounted for 40.2% of the decline in 30-day  
50  
51 mortality in Veterans with COVID-19 (Figure 3 and Supplemental Table 4).  
52  
53  
54  
55  
56  
57  
58  
59  
60

1  
2  
3 Changes in demographics, health characteristics, and contextual characteristics, and  
4 expansion of testing capacity, and decreasing hospital occupancy contributed to 19.6%, 9.0%,  
5 -0.6%, and 5.4% of the decline in hospitalization rates. Altogether, they accounted for 33.3% of  
6 the decline in hospitalization rates in Veterans with COVID-19 (Figure 3 and Supplemental  
7 Table 4).  
8  
9  
10  
11  
12  
13  
14

15 Among those hospitalized with COVID-19, changes in demographic, health characteristics,  
16 and contextual characteristics, expansion of testing capacity, and decreasing hospital  
17 occupancy accounted for 23.6%, 2.4%, -0.8%, 1.6%, and 3.1% of the decline in 30-day  
18 mortality rate respectively. All predictors collectively accounted for, 29.9% of the decline in 30-  
19 day mortality (Figure 3 and Supplemental Table 4).  
20  
21  
22  
23  
24  
25  
26  
27  
28  
29

## 30 Discussion

31  
32  
33 This analysis of temporal trends of COVID-19 hospitalization and mortality suggests  
34 substantial decline between March 2020 and September 2020. We also observed substantial  
35 shifts in the demographic and health characteristics of those who tested positive for COVID-19  
36 and in those who were hospitalized with a positive COVID-19 test including substantial decline  
37 in the percentage of Black people and comorbidity burden as well as increase in testing  
38 capacity and reduction in hospital occupancy rates. Around 40.2% of the decline in mortality  
39 rates and 33.3% of decline in hospitalization rates were explained by changes in the  
40 underlying characteristics of people who tested positive for COVID-19. Around 29.9% of the  
41 decline in mortality rates among hospitalized individuals was explained by changes in their  
42 underlying characteristics.  
43  
44  
45  
46  
47  
48  
49  
50  
51  
52  
53  
54  
55  
56  
57  
58  
59  
60

1  
2  
3 Our analysis highlights the influence of individual-level demographic and health characteristics  
4 on hospitalization and mortality rates in COVID-19. The contribution of changes in testing  
5 capacity to these outcomes (albeit small) was measurable. The contribution of hospital  
6 occupancy rates to decline in mortality rates also highlights the importance of this variable as  
7 policy makers and health systems continue to optimize the public health response to this  
8 pandemic.  
9

10 Slightly more than half of decline in rates was not predicted by the explanatory variables in our  
11 models and likely reflects the influence of factors that are not accounted for in our approach  
12 including improvement in medical care (to the extent that it may have influenced the  
13 outcomes), a putative seasonality effect, and the potential influence of the broader public  
14 health policy measures on these outcomes. In particular, it has been postulated that severity of  
15 COVID-19 may be proportionate to the viral inoculum which initiates the infection in the human  
16 host, and it is plausible that public health policies (e.g. physical distancing, masking, etc.) may  
17 have reduced the viral inoculum in some infected individuals and might have consequently  
18 resulted in less severe COVID-19 (and reduced hospitalization and mortality) – a hypothesis  
19 referred to as the variolation of coronavirus<sup>29</sup>. The COVID-19 pandemic has brought to  
20 prominence the complex interplay of several dynamic drivers including individual-level  
21 demographic and health characteristics, health system-level characteristics, the influence of  
22 socioeconomic factors, and the broader contextual reality in which people live (public health  
23 response, etc.) — all collectively shape the ultimate health outcomes of COVID-19. Continued  
24 effort to surveil temporal trends of key indicators of this global pandemic, and careful analysis  
25 of drivers of any temporal change is needed to inform ongoing effort to optimize the  
26 management of this so far unabated pandemic.  
27  
28  
29  
30  
31  
32  
33  
34  
35  
36  
37  
38  
39  
40  
41  
42  
43  
44  
45  
46  
47  
48  
49  
50  
51  
52  
53  
54  
55  
56  
57  
58  
59  
60



1  
2  
3 A key strength of this analysis is the use of individual level data from the US Department of  
4 Veterans Affairs which operates the largest nationally integrated health care system in the US,  
5  
6 and use of advanced methods to decompose the influence of changes in demographics and  
7  
8 health characteristics on temporal trends. In addition to accounting for individual-level  
9  
10 demographic and health characteristics, our analyses also account for contextual variables,  
11  
12 testing capacity, and measures of hospital occupancy rates — as important determinants of  
13  
14 outcomes in this pandemic.  
15  
16  
17  
18

19  
20 This analysis has several limitations. While the use of data from the Department of Veterans  
21  
22 Affairs enabled the evaluation of national temporal trends using individual-level data, the  
23  
24 Veteran population is comprised of older White males and the findings may not be  
25  
26 generalisable to the general population. While we used validated definitions to identify  
27  
28 covariates, we cannot completely rule out misclassification bias. While we accounted for  
29  
30 known predictors, our analyses do not account for predictors that are not measured in the  
31  
32 datasets including improvement in medical care as the pandemic progressed, and other  
33  
34 unmeasured or unknown variables.  
35  
36  
37  
38

39 In sum, between March 2020 and September 2020, substantial decline in 30-day mortality and  
40  
41 hospitalization among COVID-19 positive individuals and substantial decline in 30- day  
42  
43 mortality among hospitalized Veterans with COVID-19. The temporal decline in these  
44  
45 outcomes was partially explained by changes in underlying demographic, health, and  
46  
47 contextual characteristics, and well as expansion of testing capacity, and reduction in hospital  
48  
49 capacity. The results may be helpful in informing effort to optimize the collective public health  
50  
51 response to this ongoing pandemic.  
52  
53  
54  
55  
56  
57  
58  
59  
60

1  
2  
3 **Author Contribution:**  
4

5  
6 *Concept and design:* All authors.  
7

8  
9 *Acquisition, analysis, or interpretation of data:* Cai, Bowe, Xie.  
10

11  
12 *Drafting of the manuscript:* Cai, Al-Aly.  
13

14  
15 *Critical revision of the manuscript for important intellectual content:* All authors.  
16

17  
18 *Statistical analysis:* Cai, Bowe, Xie.  
19

20  
21 *Supervision and funding:* Al-Aly.  
22

23  
24 **Conflict of Interest Disclosures:** None reported.  
25

26  
27 **Funding:** This study was funded by the United States Department of Veterans Affairs (grant  
28  
29 number 1I21HX002995-01A1).  
30

31  
32 **Role of the Funder/Sponsor:** The funders had no role in design and conduct of the study;  
33  
34 collection, management, analysis, and interpretation of the data; preparation, review, or  
35  
36 approval of the manuscript; and decision to submit the manuscript for publication.  
37

38  
39 **Reproducible Research Statement:** Study protocol and Statistical code: Available by  
40  
41 request. Data set: Available to those who have access to the Department of Veteran Affairs  
42  
43 data sets.  
44

45  
46  
47 **Disclaimer:** The contents do not represent the views of the United States Department of  
48  
49 Veterans Affairs or the United States government.  
50

## References

1. Center for Disease Control and Prevention. COVIDView A Weekly Surveillance Summary of U.S. COVID-19 Activity: Center for Disease Control and Prevention; 2020 [Available from: <https://www.cdc.gov/coronavirus/2019-ncov/covid-data/covidview/index.html2020>].
2. Horwitz L, Jones SA, Cerfolio RJ, et al. Trends in COVID-19 Risk-Adjusted Mortality Rates. *Journal of Hospital Medicine* 2020;15:E1-E3. doi: 10.12788/jhm.3552
3. Dennis J, McGovern A, Vollmer S, et al. Improving COVID-19 critical care mortality over time in England: A national cohort study, March to June 2020. *medRxiv* 2020
4. United States Department of Veteran Affairs. COVID-19:Shared Data Resource 2020 [Available from: [https://vhacdwdwhweb100.vha.med.va.gov/phenotype/index.php/COVID-19:Shared\\_Data\\_Resource#Acknowledgements\\_COVID-19\\_Shared\\_Data\\_Resource](https://vhacdwdwhweb100.vha.med.va.gov/phenotype/index.php/COVID-19:Shared_Data_Resource#Acknowledgements_COVID-19_Shared_Data_Resource)].
5. The Department of Veterans Affairs OoIT. Corporate Data Warehouse (CDW) 2014 [updated March 27, 2014. Available from: [https://www.hsrd.research.va.gov/for\\_researchers/vinci/cdw.cfm](https://www.hsrd.research.va.gov/for_researchers/vinci/cdw.cfm) accessed November 1 2019.
6. Bowe B, Xie Y, Xian H, et al. Geographic Variation and US County Characteristics Associated With Rapid Kidney Function Decline. *Kidney Int Rep* 2017;2(1):5-17. doi: 10.1016/j.ekir.2016.08.016
7. Xie Y, Bowe B, Li T, et al. Long-term kidney outcomes among users of proton pump inhibitors without intervening acute kidney injury. *Kidney Int* 2017;91(6):1482-94. doi: 10.1016/j.kint.2016.12.021 [published Online First: 2017/02/27]
8. Xie Y, Bowe B, Li TT, et al. Risk of death among users of Proton Pump Inhibitors: a longitudinal observational cohort study of United States veterans. *Bmj Open* 2017;7(6) doi: ARTN e015735  
10.1136/bmjopen-2016-015735
9. Bowe B, Xie Y, Li T, et al. Particulate Matter Air Pollution and the Risk of Incident CKD and Progression to ESRD. *J Am Soc Nephrol* 2018;29(1):218-30. doi: 10.1681/ASN.2017030253 [published Online First: 2017/09/25]
10. Xie Y, Bowe B, Li T, et al. Higher blood urea nitrogen is associated with increased risk of incident diabetes mellitus. *Kidney international* 2018;93(3):741-52. doi: 10.1016/j.kint.2017.08.033
11. Bowe B, Xie Y, Yan Y, et al. Burden of Cause-Specific Mortality Associated With PM2.5 Air Pollution in the United States. *JAMA Netw Open* 2019;2(11):e1915834. doi: 10.1001/jamanetworkopen.2019.15834 [published Online First: 2019/11/21]
12. Xie Y, Bowe B, Yan Y, et al. Estimates of all cause mortality and cause specific mortality associated with proton pump inhibitors among US veterans: cohort study. *BMJ-British Medical Journal* 2019;365 doi: ARTN I1580  
10.1136/bmj.I1580
13. Bowe B, Xie Y, Li T, et al. Associations of ambient coarse particulate matter, nitrogen dioxide, and carbon monoxide with the risk of kidney disease: a cohort study. *The Lancet Planetary health* 2017;1(7):e267-e76. doi: 10.1016/S2542-5196(17)30117-1
14. Bowe B, Xie Y, Xian H, et al. Association between Monocyte Count and Risk of Incident CKD and Progression to ESRD. *Clin J Am Soc Nephrol* 2017;12(4):603-13. doi: 10.2215/CJN.09710916
15. Bowe B, Xie Y, Li T, et al. Estimates of the 2016 global burden of kidney disease attributable to ambient fine particulate matter air pollution. *BMJ Open* 2019;9(5):e022450. doi: 10.1136/bmjopen-2018-022450
16. Al-Aly Z, Maddukuri G, Xie Y. Proton Pump Inhibitors and the Kidney: Implications of Current Evidence for Clinical Practice and When and How to Deprescribe. *American journal of kidney diseases : the official journal of the National Kidney Foundation* 2020;75(4):497-507. doi: 10.1053/j.ajkd.2019.07.012 [published Online First: 2019/10/14]

17. Bowe BC, M; Xie, Y; Gibson, A; Maddukuri, G; Al-Aly, Z. Acute Kidney Injury in a National Cohort of Hospitalized United States Veterans with COVID-19. *Clinical Journal of the American Society of Nephrology* 2020 doi: doi: 10.2215/CJN.09610620
18. Kind AJ, Buckingham WR. Making Neighborhood-Disadvantage Metrics Accessible—The Neighborhood Atlas. *New England Journal of Medicine* 2018;378(26):2456-58.
19. Levey AS, Stevens LA. Estimating GFR using the CKD Epidemiology Collaboration (CKD-EPI) creatinine equation: more accurate GFR estimates, lower CKD prevalence estimates, and better risk predictions. *Am J Kidney Dis* 2010;55(4):622-7. doi: 10.1053/j.ajkd.2010.02.337 [published Online First: 2010/03/27]
20. Xie Y, Bowe B, Gibson AK, et al. Comparative Effectiveness of SGLT2 Inhibitors, GLP-1 Receptor Agonists, DPP-4 Inhibitors, and Sulfonylureas on Risk of Kidney Outcomes: Emulation of a Target Trial Using Health Care Databases. *Diabetes Care* 2020 doi: 10.2337/dc20-1890 [published Online First: 2020/09/18]
21. Xie Y, Bowe B, Gibson AK, et al. Comparative Effectiveness of the Sodium-Glucose Cotransporter 2 Inhibitor Empagliflozin Versus Other Antihyperglycemics on Risk of Major Adverse Kidney Events. *Diabetes Care* 2020 doi: 10.2337/dc20-1231 [published Online First: 2020/09/12]
22. Xie Y, Bowe B, Gibson AK, et al. Comparative Effectiveness of SGLT2 Inhibitors, GLP-1 Receptor Agonists, DPP-4 Inhibitors, and Sulfonylureas on Risk of Kidney Outcomes: Emulation of a Target Trial Using Health Care Databases. *Diabetes care* 2020;43(11):2859-69. doi: 10.2337/dc20-1890 [published Online First: 2020/09/18]
23. Xie Y, Bowe B, Gibson AK, et al. Comparative Effectiveness of the Sodium-Glucose Cotransporter 2 Inhibitor Empagliflozin Versus Other Antihyperglycemics on Risk of Major Adverse Kidney Events. *Diabetes care* 2020;43(11):2785-95. doi: 10.2337/dc20-1231 [published Online First: 2020/09/12]
24. Di Pino A, Scicali R, Calanna S, et al. Cardiovascular risk profile in subjects with prediabetes and new-onset type 2 diabetes identified by HbA(1c) according to American Diabetes Association criteria. *Diabetes Care* 2014;37(5):1447-53. doi: 10.2337/dc13-2357 [published Online First: 2014/02/28]
25. Carey RM, Whelton PK, Committee AAHW. Prevention, Detection, Evaluation, and Management of High Blood Pressure in Adults: Synopsis of the 2017 American College of Cardiology/American Heart Association Hypertension Guideline. *Ann Intern Med* 2018;168(5):351-58. doi: 10.7326/M17-3203 [published Online First: 2018/01/23]
26. Curtin LR, Klein RJ. Direct standardization (age-adjusted death rates): US Department of Health and Human Services, Public Health Service, Centers for Disease Control and Prevention, National Center for Health Statistics 1995.
27. Das Gupta P. Standardization and decomposition of rates from cross-classified data. *Genus* 1994;50(3-4):171-96.
28. R Core Team. R: A language and environment for statistical computing: Vienna, Austria, 2013.
29. Gandhi M, Rutherford GW. Facial Masking for Covid-19 - Potential for "Variolation" as We Await a Vaccine. *The New England journal of medicine* 2020;383(18):e101. doi: 10.1056/NEJMp2026913 [published Online First: 2020/09/09]

**Table 1:** Characteristics of the individuals with COVID-19 and hospitalized individuals with COVID-19

| Characteristic                                         | Veterans with COVID-19 (N = 49238) | Hospitalized Veterans with COVID-19 (N = 9428) |
|--------------------------------------------------------|------------------------------------|------------------------------------------------|
| <b>Demographics</b>                                    |                                    |                                                |
| Age, median (IQR), year                                | 63.3 (49.8-73.1)                   | 70.6 (61.2-76.8)                               |
| Race, no. (%)                                          |                                    |                                                |
| White                                                  | 29814 (60.6)                       | 5054 (53.6)                                    |
| Black                                                  | 16714 (33.9)                       | 3809 (40.4)                                    |
| Other                                                  | 2710 ( 5.5)                        | 565 ( 6.0)                                     |
| Sex, no. (%), women                                    | 5673 (11.5)                        | 527 ( 5.6)                                     |
| <b>Health characteristics</b>                          |                                    |                                                |
| BMI category, no. (%)                                  |                                    |                                                |
| Underweight (<8.5 kg/m <sup>2</sup> )                  | 265 ( 0.5)                         | 83 ( 0.9)                                      |
| Normal weight (18.5 to <25 kg/m <sup>2</sup> )         | 9939 (20.2)                        | 1836 (19.5)                                    |
| Overweight (25 to <30 kg/m <sup>2</sup> )              | 15032 (30.5)                       | 2922 (31.0)                                    |
| Obesity (>18.5 kg/m <sup>2</sup> )                     | 24002 (48.7)                       | 4587 (48.7)                                    |
| Smoke, no. (%)                                         |                                    |                                                |
| Never smoker                                           | 27492 (55.8)                       | 4713 (50.0)                                    |
| Former smoker                                          | 13062 (26.5)                       | 2956 (31.4)                                    |
| Current smoker                                         | 8684 (17.6)                        | 1759 (18.7)                                    |
| Hypertension, no. (%)                                  | 30568 (62.1)                       | 6347 (67.3)                                    |
| Diabetes, no. (%)                                      | 13717 (27.9)                       | 3695 (39.2)                                    |
| Cancer, no. (%)                                        | 4558 ( 9.3)                        | 1443 (15.3)                                    |
| Cardiovascular disease, no. (%)                        | 10399 (21.1)                       | 3417 (36.2)                                    |
| Cerebrovascular disease, no. (%)                       | 5192 (10.5)                        | 1836 (19.5)                                    |
| Dementia, no. (%)                                      | 5350 (10.9)                        | 1953 (20.7)                                    |
| Chronic kidney disease, no. (%)                        | 9573 (21.9)                        | 3042 (34.9)                                    |
| Peripheral artery disease, no. (%)                     | 1411 ( 2.9)                        | 543 ( 5.8)                                     |
| HIV, no. (%)                                           | 504 ( 1.0)                         | 141 ( 1.5)                                     |
| Pneumonia, no. (%)                                     | 765 ( 1.6)                         | 336 ( 3.6)                                     |
| COPD, no. (%)                                          | 7666 (15.6)                        | 2429 (25.8)                                    |
| <b>Contextual factors</b>                              |                                    |                                                |
| ADI rank category, no. (%)                             |                                    |                                                |
| 0 to 33.3                                              | 10248 (20.8)                       | 1785 (18.9)                                    |
| 33.4 to 66.6                                           | 20861 (42.4)                       | 3643 (38.6)                                    |
| 66.7 to 100                                            | 18129 (36.8)                       | 4000 (42.4)                                    |
| <b>Testing capacity</b>                                |                                    |                                                |
| COVID-19 testing capacity, mean (SD), per 10000 people | 3.1 (1.9)                          | 2.8 (1.8)                                      |
| <b>Hospital occupancy</b>                              |                                    |                                                |
| Hospital occupancy, mean (SD), %                       | 37.0 (10.8)                        | 38.1 (10.5)                                    |

ADI: area deprivation index; COPD: Chronic obstructive pulmonary disease; eGFR: Estimated Glomerular Filtration Rate; HIV: Human immunodeficiency virus; IQR: interquartile range; IQR: interquartile range; SD: standard deviation.

**Table 2** 30-day mortality and hospitalization rates in US veterans by 30-day periods, March 20, 2020 to September 19, 2020

| Periods                  | Total number of COVID-19 patients | 30-day mortality, n (%) | Hospitalization, n (%) | 30-day mortality among hospitalized COVID-19 patients, n (%) |
|--------------------------|-----------------------------------|-------------------------|------------------------|--------------------------------------------------------------|
| March 20 - April 19      | 5896                              | 13.6%                   | 33.8%                  | 23.5%                                                        |
| April 20 - May 19        | 6685                              | 12.3%                   | 17.2%                  | 17.0%                                                        |
| May 20 - June 19         | 4824                              | 7.1%                    | 20.0%                  | 12.6%                                                        |
| June 20 - July 19        | 13084                             | 4.9%                    | 17.4%                  | 11.8%                                                        |
| July 20 - August 19      | 11874                             | 5.2%                    | 15.8%                  | 11.1%                                                        |
| August 20 - September 19 | 6875                              | 4.4%                    | 17.0%                  | 10.8%                                                        |
| <b>Overall</b>           | <b>49238</b>                      | <b>7.2%</b>             | <b>19.1%</b>           | <b>14.8%</b>                                                 |

**Table 3** Odd ratios (95% confidence intervals) of predictors associated with 30-day mortality and hospitalization among Veterans and hospitalized Veterans with COVID-19

| Characteristics                                 | Veterans with COVID-19 |                   | Hospitalized Veterans with COVID-19 |
|-------------------------------------------------|------------------------|-------------------|-------------------------------------|
|                                                 | 30-day mortality       | Hospitalization   | 30-day mortality                    |
| <b>Demographics</b>                             |                        |                   |                                     |
| Age                                             | 1.08 (1.07, 1.08)      | 1.02 (1.02, 1.02) | 1.06 (1.06, 1.07)                   |
| Race (reference = white)                        |                        |                   |                                     |
| Black                                           | 1.11 (1.01, 1.22)      | 1.64 (1.56, 1.74) | 1.03 (0.90, 1.18)                   |
| Other                                           | 1.33 (1.12, 1.58)      | 1.58 (1.42, 1.76) | 1.20 (0.92, 1.57)                   |
| Sex, women (reference = men)                    | 0.52 (0.40, 0.67)      | 0.74 (0.67, 0.82) | 0.72 (0.47, 1.06)                   |
| <b>Health characteristics</b>                   |                        |                   |                                     |
| BMI category (reference = normal weight)        |                        |                   |                                     |
| Underweight (< 18.5 kg/m <sup>2</sup> )         | 1.03 (0.64, 1.59)      | 1.26 (0.92, 1.71) | 0.67 (0.29, 1.38)                   |
| Overweight (25 to < 30 kg/m <sup>2</sup> )      | 0.89 (0.80, 1.00)      | 0.98 (0.91, 1.06) | 1.07 (0.90, 1.29)                   |
| Obesity (> 18.5 kg/m <sup>2</sup> )             | 1.02 (0.92, 1.15)      | 1.05 (0.98, 1.13) | 1.24 (1.03, 1.49)                   |
| Smoking status (reference = never smoker)       |                        |                   |                                     |
| Former smoker                                   | 1.15 (1.05, 1.25)      | 1.01 (0.96, 1.07) | 1.11 (0.97, 1.28)                   |
| Current smoker                                  | 1.12 (0.99, 1.27)      | 1.11 (1.03, 1.19) | 1.21 (1.00, 1.46)                   |
| Hypertension                                    | 0.87 (0.80, 0.94)      | 1.10 (1.04, 1.16) | 0.81 (0.70, 0.92)                   |
| Diabetes                                        | 1.37 (1.26, 1.49)      | 1.23 (1.16, 1.29) | 1.15 (1.00, 1.31)                   |
| Cancer                                          | 1.10 (0.99, 1.22)      | 1.36 (1.27, 1.47) | 1.03 (0.88, 1.21)                   |
| Cardiovascular disease                          | 1.17 (1.07, 1.27)      | 1.43 (1.35, 1.52) | 1.15 (1.00, 1.31)                   |
| Cerebrovascular disease                         | 1.09 (0.98, 1.20)      | 1.38 (1.29, 1.48) | 1.04 (0.90, 1.21)                   |
| Dementia                                        | 1.81 (1.65, 2.00)      | 1.52 (1.41, 1.63) | 1.37 (1.18, 1.59)                   |
| Chronic kidney disease                          | 1.48 (1.36, 1.61)      | 1.27 (1.20, 1.35) | 1.47 (1.28, 1.68)                   |
| Peripheral arterial disease                     | 1.09 (0.92, 1.29)      | 1.31 (1.16, 1.48) | 1.17 (0.92, 1.47)                   |
| HIV                                             | 1.05 (0.67, 1.58)      | 1.50 (1.22, 1.85) | 1.23 (0.71, 2.03)                   |
| Pneumonia                                       | 1.44 (1.15, 1.80)      | 2.00 (1.71, 2.35) | 1.22 (0.90, 1.62)                   |
| COPD                                            | 1.21 (1.10, 1.32)      | 1.40 (1.31, 1.49) | 0.96 (0.83, 1.11)                   |
| <b>Contextual factors</b>                       |                        |                   |                                     |
| ADI rank (reference = 1-33.2)                   |                        |                   |                                     |
| 33.3 to 66.6                                    | 0.99 (0.89, 1.10)      | 1.03 (0.96, 1.10) | 0.94 (0.79, 1.11)                   |
| 66.7 to 100                                     | 1.04 (0.93, 1.16)      | 1.16 (1.09, 1.25) | 0.92 (0.77, 1.09)                   |
| <b>COVID-19 testing capacity</b>                |                        |                   |                                     |
| COVID-19 testing capacity (per 10,000 veterans) | 0.92 (0.90, 0.94)      | 0.95 (0.94, 0.96) | 0.90 (0.86, 0.93)                   |
| <b>Hospital occupancy</b>                       |                        |                   |                                     |
| Hospital occupancy rate (an increase of 10%)    | 1.05 (1.01, 1.08)      | Not included      | 1.08 (1.02, 1.15)                   |
| <i>C-statistics</i>                             | 0.834                  | 0.718             | 0.746                               |

ADI: area deprivation index; COPD: Chronic obstructive pulmonary disease; eGFR: Estimated Glomerular Filtration Rate; HIV: Human immunodeficiency virus.

## Figure Legends:

**Figure 1. Temporal trends of COVID-19 30-day mortality and hospitalization among US Veterans. A and B: 30-day mortality and hospitalization rates in US Veterans who had a positive COVID-19 test (N=29,528). C: 30-day mortality rate in hospitalized US Veterans with a positive COVID-19 test (N=6,449).** Fully standardized rates were adjusted for, demographics (age, race, gender), health characteristics (smoking status, body weight index, cancer, cardiovascular disease, chronic kidney disease, dementia, diabetes mellitus type 2, human immunodeficiency virus, hypertension, peripheral artery disease, pneumonia, and stroke), contextual factors (area deprivation index), COVID-19 testing capacity, and hospital occupancy.

**Figure 2A The change in predictors of 30-day mortality and hospitalization among US Veterans with COVID-19 between 3/20–4/19, 2020 and 8/20–9/19, 2020.** The yellow dots represent the prevalence of predictors in 3/20–4/19, 2020, while the green dots represent the prevalence of predictors in 8/20–9/19, 2020. In the delta column, blue text indicates that the change of predictor leads to decrease in mortality and hospitalization rates, while red text indicates the change of predictor leads to increase in mortality and hospitalization rates. COPD: chronic obstructive pulmonary disease.

**Figure 2B The change in predictors of 30-day mortality among hospitalized US Veterans with COVID-19 between 3/20–4/19, 2020 and 8/20–9/19, 2020.** The yellow dots represent the prevalence of predictors in 3/20–4/19, 2020, while the green dots represent the prevalence of predictors in 8/20–9/19, 2020. In the  $\Delta$  column, blue text indicates that the change of predictor leads to decrease in mortality rates, while red text indicates the change of predictor leads to increase in mortality rates. COPD: chronic obstructive pulmonary disease.

**Figure 3 The contribution of changes in demographics, health characteristics, testing capacity, hospital occupancy, and contextual factors, and epidemiological changes to changes in 30-day mortality and hospitalization rates between 3/20–4/19, 2020 and 8/20–9/19, 2020.** The red dot represents the observed change in rate of outcomes between the two periods, and the blue dot represents the change predicted based on demographics, health, contextual characteristics, COVID-19 testing capacity, and hospital occupancy. Hospital occupancy is not considered as predictor for the hospitalization outcome model. Epidemiological changes collectively represent the difference between predicted and observed rates and reflect the summative contribution of factors that are not accounted for in prediction models.



### 30-day mortality rates among US Veterans with a positive COVID-19 test

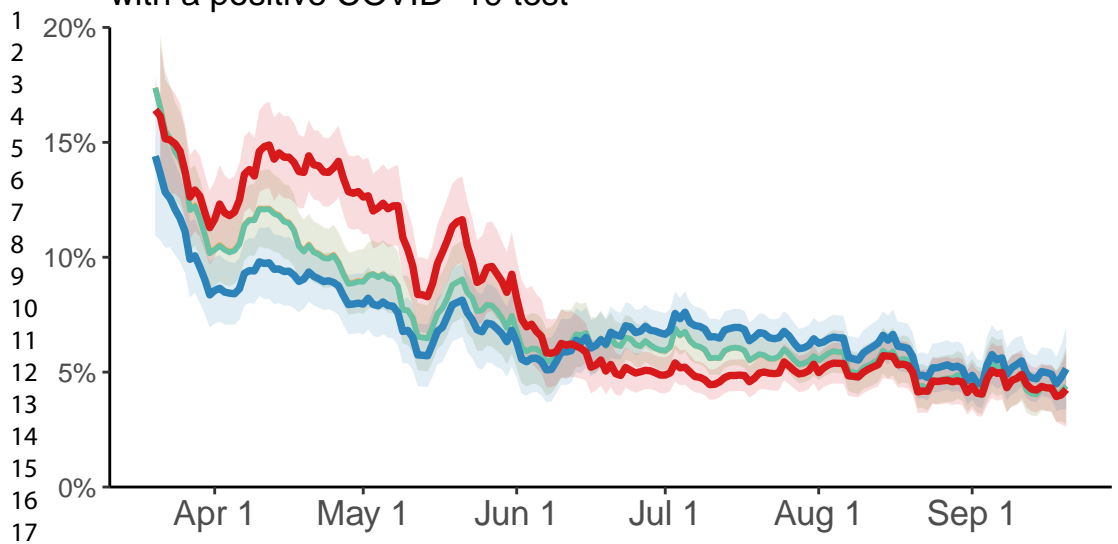

### Hospitalization rates among US Veterans with a positive COVID-19 test

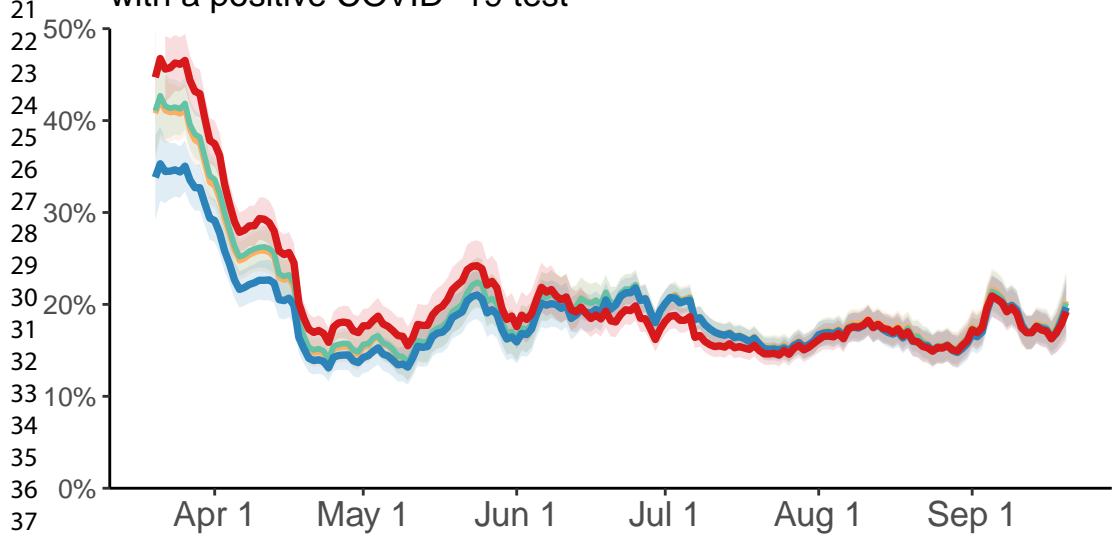

### 30-day mortality rates among hospitalized US Veterans with a positive COVID-19 test

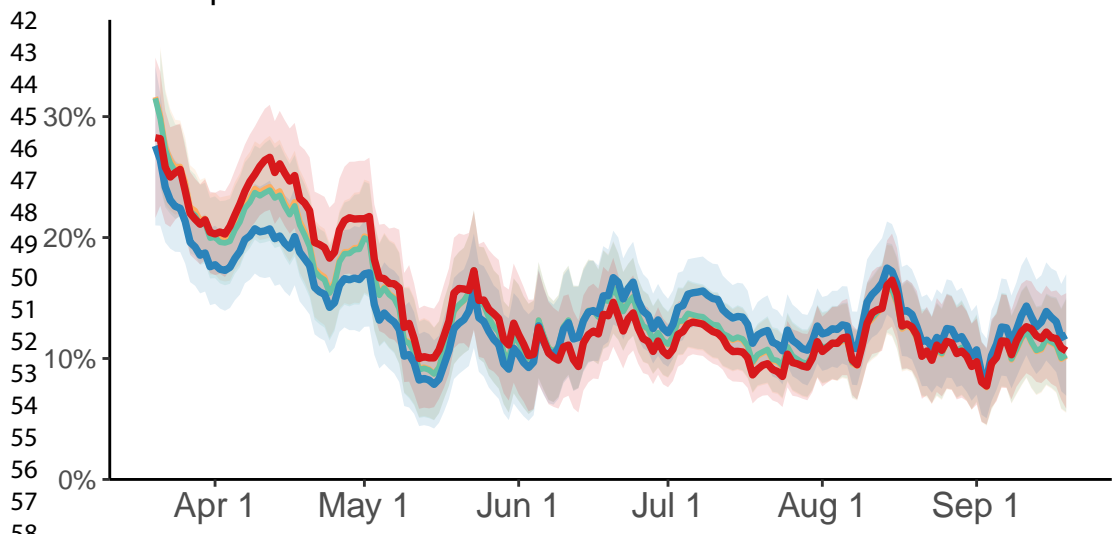

■ Crude      ■ Age, race, gender, and ADI standardized  
■ Fully standardized      ■ Age, race, gender standardized

Demographics

Aug 20 – Sep 19 Mar 20 – Apr 19

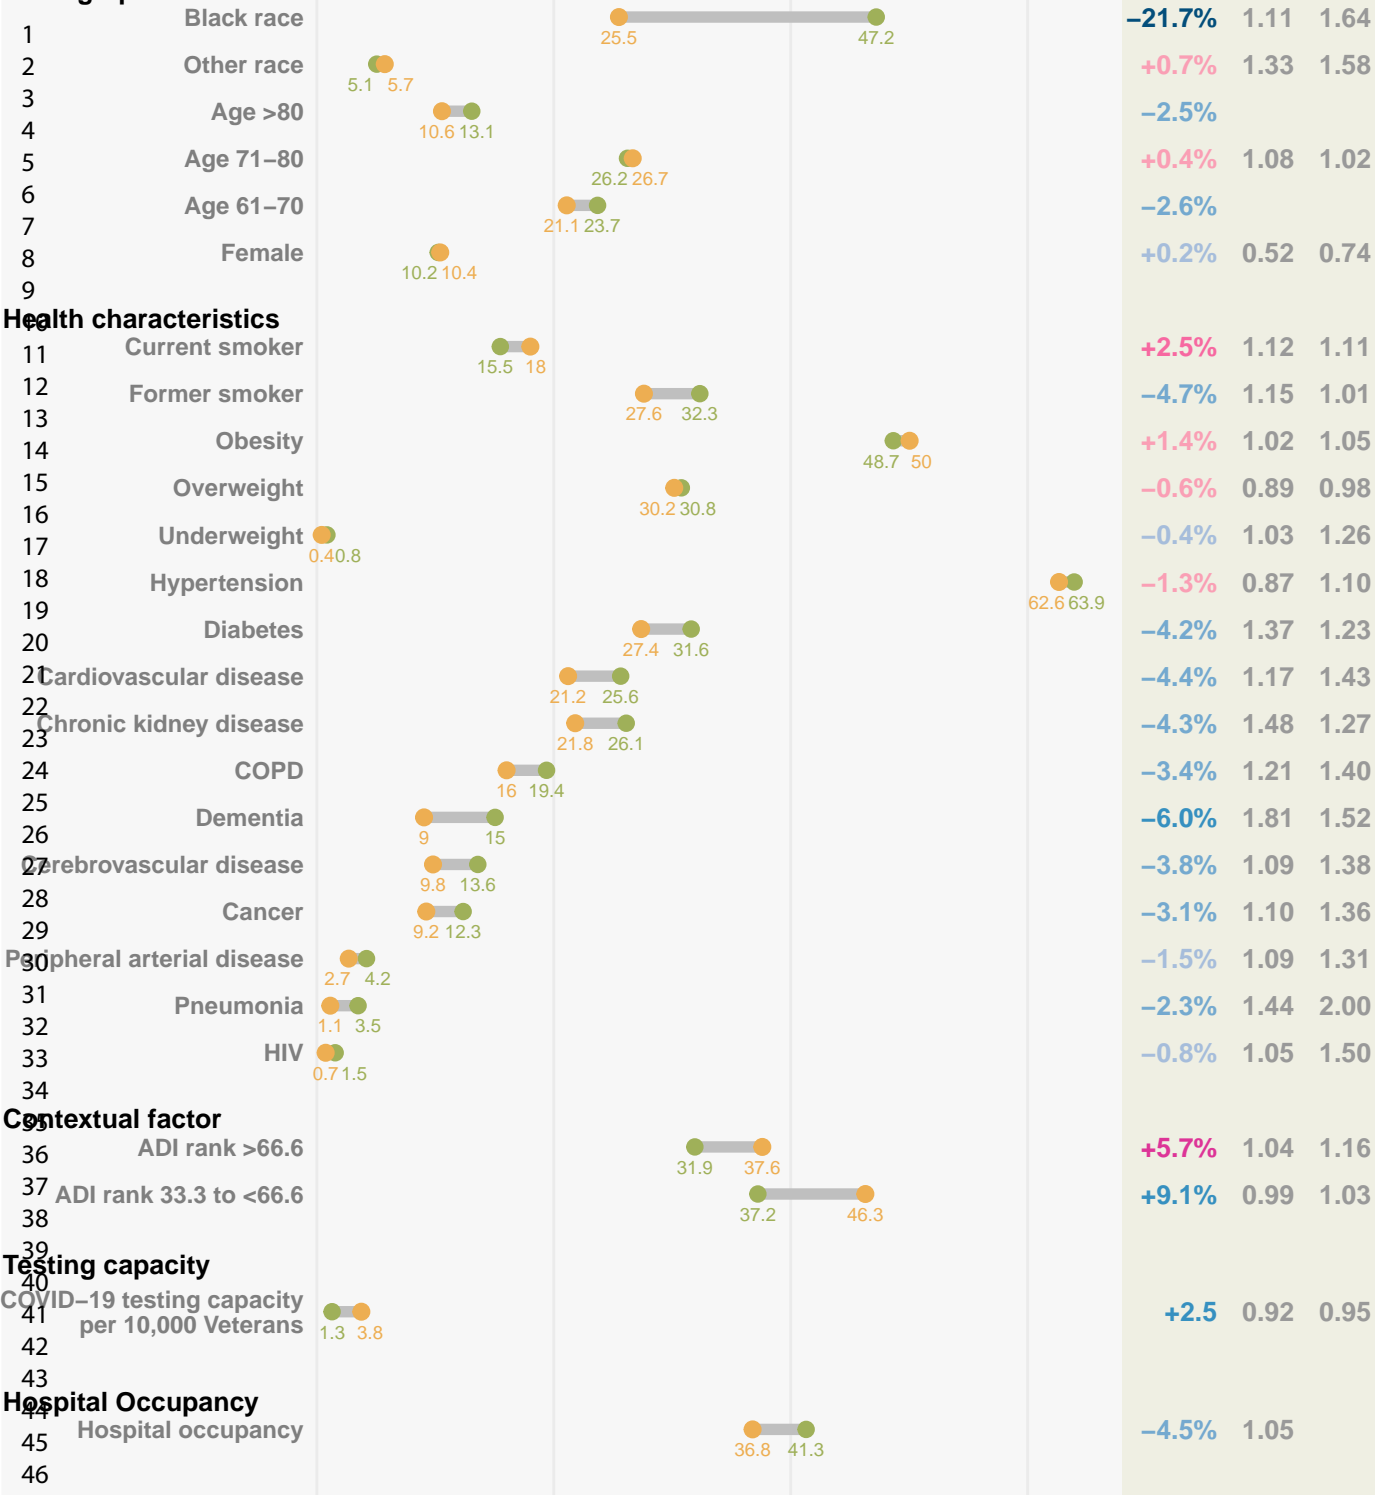

BMJ Open

Aug 20 – Sep 19

Mar 20 – Apr 19

Demographics

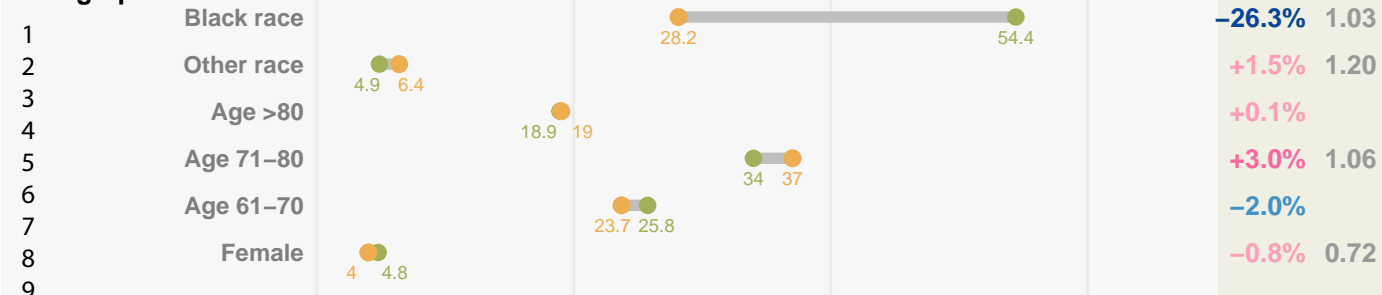

Health characteristics

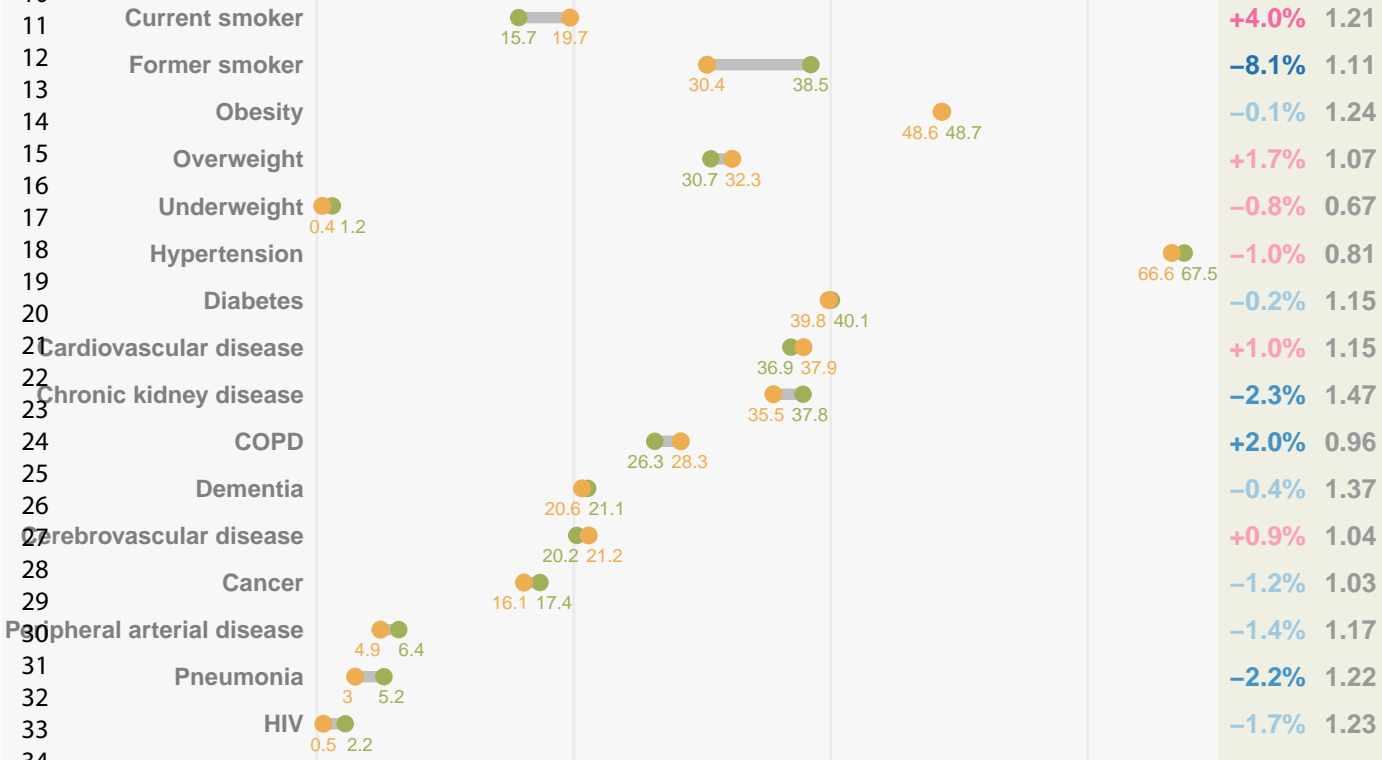

Contextual factor

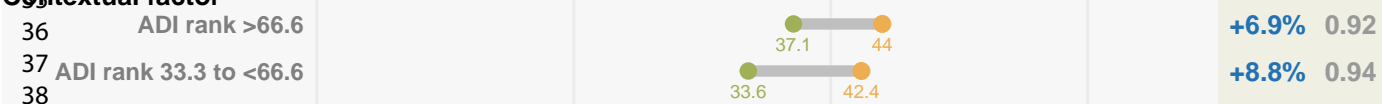

Testing capacity

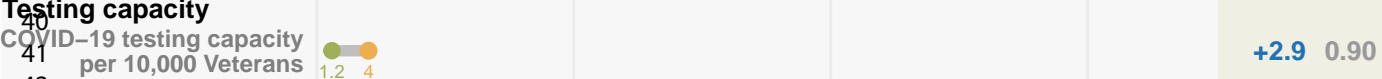

Hospital Occupancy

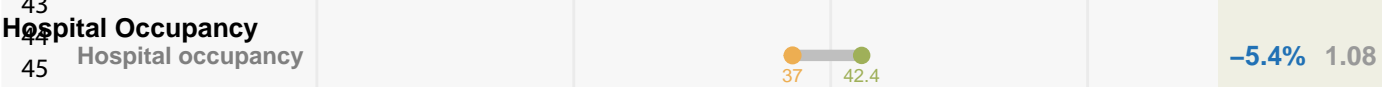

1 30-day mortality rate change in  
 2 Veterans with COVID-19  
 3  
 4  
 5  
 6  
 7 Hospitalization rate change in  
 8 Veterans with COVID-19  
 9  
 10  
 11  
 12  
 13  
 14  
 15 30-day mortality rate change in  
 16 hospitalized Veterans with COVID-19  
 17  
 18  
 19  
 20  
 21

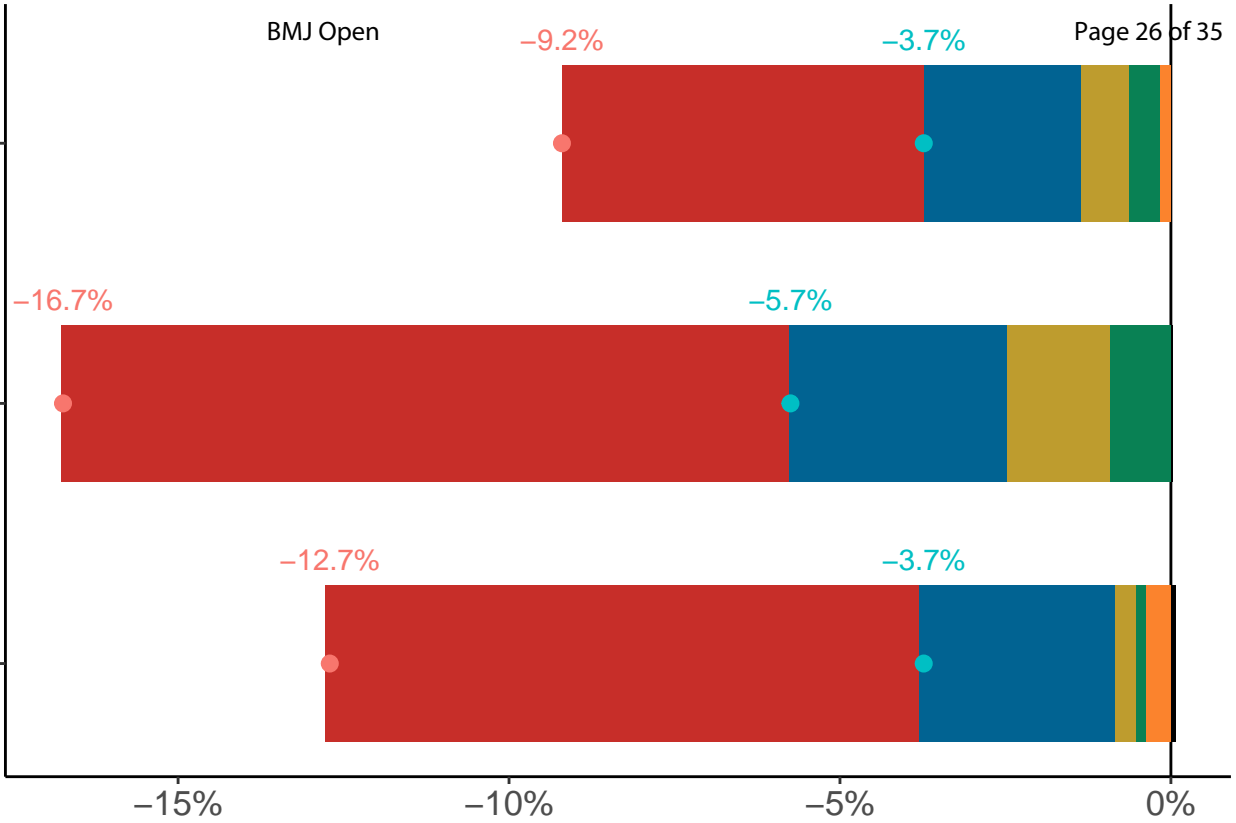

Contextual characteristics
  Hospital occupancy
  Testing capacity  
 Health characteristics
  Demographics
  Epidemiological change

**Supplemental material**

|                                                                                                                                                                                            |            |
|--------------------------------------------------------------------------------------------------------------------------------------------------------------------------------------------|------------|
| <b>Table of Contents</b>                                                                                                                                                                   |            |
| <b>Supplemental Table 1</b> Health care resource utilization among hospitalized Veterans with COVID-19                                                                                     | <b>2</b>   |
| <b>Supplemental Table 2:</b> C statistics (95% confidence intervals) for nested models using different combination of predictors                                                           | <b>3</b>   |
| <b>Supplemental Table 3A</b> Characteristics of US Veterans with COVID-19 overall and by different month periods                                                                           | <b>4-5</b> |
| <b>Supplemental Table 3B</b> Characteristics of hospitalized US Veterans with COVID-19 overall and by different month periods                                                              | <b>6-7</b> |
| <b>Supplemental Table 4</b> Contribution of changes in demographic, health, and contextual characteristics to temporal differences in outcomes between 3/20–4/19, 2020 and 6/20–7/20, 2020 | <b>8</b>   |

**Supplemental Table 1** Health care resource utilization among hospitalized Veterans with COVID-19

| <b>Month</b>             | <b>ICU</b>   | <b>Mechanical Ventilation</b> | <b>LOS</b>  |
|--------------------------|--------------|-------------------------------|-------------|
| March 20 - April 19      | 35.6%        | 20.6%                         | 13.8        |
| April 20 - May 19        | 31.0%        | 13.5%                         | 16.2        |
| May 20 - June 19         | 31.2%        | 11.4%                         | 12.1        |
| June 20 - July 19        | 29.7%        | 11.7%                         | 11.4        |
| July 20 - August 19      | 28.2%        | 11.2%                         | 11          |
| August 20 - September 19 | 31.6%        | 9.3%                          | 9.6         |
| <b>Overall</b>           | <b>31.2%</b> | <b>13.4%</b>                  | <b>12.3</b> |

ICU: intensive care units; LOS: length of stay.

**Supplemental Table 2:** C statistics (95% confidence intervals) for nested models using different combination of predictors

| Cohort                      | Veterans with COVID-19 |                     | Hospitalized Veterans with COVID-19 |
|-----------------------------|------------------------|---------------------|-------------------------------------|
|                             | 30-day mortality       | Hospitalization     | 30-day mortality                    |
| Predictor variables         |                        |                     |                                     |
| Demographics                | 0.822 (0.816-0.828)    | 0.678 (0.673-0.684) | 0.725 (0.712-0.738)                 |
| + health characteristics    | 0.832 (0.826-0.838)    | 0.713 (0.707-0.719) | 0.740 (0.726-0.753)                 |
| + contextual factors        | 0.832 (0.826-0.838)    | 0.714 (0.708-0.720) | 0.741 (0.726-0.754)                 |
| + COVID-19 testing capacity | 0.834 (0.828-0.840)    | 0.715 (0.709-0.721) | 0.745 (0.730-0.758)                 |
| + hospital occupancy        | 0.834 (0.828-0.841)    | 0.718 (0.712-0.723) | 0.746 (0.732-0.759)                 |

Each + indicates including all the variable above that row. For example, "+ contextual factors" indicates including demographics, health characteristics, and contextual factors as predictors.

| <b>Supplemental Table 3A: Characteristics of US Veterans with COVID-19 overall and by different month periods</b> |                              |                                             |                                           |                                          |                                            |                                              |                                                  |
|-------------------------------------------------------------------------------------------------------------------|------------------------------|---------------------------------------------|-------------------------------------------|------------------------------------------|--------------------------------------------|----------------------------------------------|--------------------------------------------------|
| <b>Characteristic</b>                                                                                             | <b>Overall<br/>N = 49238</b> | <b>March 20 –<br/>April 19<br/>N = 5896</b> | <b>April 20 –<br/>May 19<br/>N = 6685</b> | <b>May 20 –<br/>June 19<br/>N = 4824</b> | <b>June 20 –<br/>July 19<br/>N = 13084</b> | <b>July 20 –<br/>August 19<br/>N = 11874</b> | <b>August 20 –<br/>September 19<br/>N = 6875</b> |
| Age, median (IQR), year                                                                                           | 63.3<br>(49.8-73.1)          | 65.3<br>(53.7-73.8)                         | 68.0<br>(56.6-76.1)                       | 63.9<br>(50.0-73.4)                      | 59.6<br>(44.7- 71.4)                       | 62.9<br>(49.6-72.8)                          | 64.3<br>(50.2-73.3)                              |
| Race, no. (%)                                                                                                     |                              |                                             |                                           |                                          |                                            |                                              |                                                  |
| White                                                                                                             | 29814 (60.6)                 | 2814 (47.7)                                 | 3908 (58.5)                               | 2877 (59.6)                              | 7991 (61.1)                                | 7496 (63.1)                                  | 4728 (68.8)                                      |
| Black                                                                                                             | 16714 (33.9)                 | 2784 (47.2)                                 | 2492 (37.3)                               | 1693 (35.1)                              | 4272 (32.7)                                | 3720 (31.3)                                  | 1753 (25.5)                                      |
| Other                                                                                                             | 2710 ( 5.5)                  | 298 ( 5.1)                                  | 285 ( 4.3)                                | 254 ( 5.3)                               | 821 ( 6.3)                                 | 658 ( 5.5)                                   | 394 ( 5.7)                                       |
| Sex, no. (%), women                                                                                               | 5673 (11.5)                  | 604 (10.2)                                  | 693 (10.4)                                | 557 (11.5)                               | 1671 (12.8)                                | 1432 (12.1)                                  | 716 (10.4)                                       |
| BMI category, no. (%)                                                                                             |                              |                                             |                                           |                                          |                                            |                                              |                                                  |
| Underweight (<8.5 kg/m <sup>2</sup> )                                                                             | 265 ( 0.5)                   | 50 ( 0.8)                                   | 56 ( 0.8)                                 | 38 ( 0.8)                                | 49 ( 0.4)                                  | 44 ( 0.4)                                    | 28 ( 0.4)                                        |
| Normal weight (18.5 to <25 kg/m <sup>2</sup> )                                                                    | 9939 (20.2)                  | 1163 (19.7)                                 | 1645 (24.6)                               | 1018 (21.1)                              | 2508 (19.2)                                | 2272 (19.1)                                  | 1333 (19.4)                                      |
| Overweight (25 to <30 kg/m <sup>2</sup> )                                                                         | 15032 (30.5)                 | 1814 (30.8)                                 | 2030 (30.4)                               | 1521 (31.5)                              | 4025 (30.8)                                | 3568 (30.0)                                  | 2074 (30.2)                                      |
| Obesity (>18.5 kg/m <sup>2</sup> )                                                                                | 24002 (48.7)                 | 2869 (48.7)                                 | 2954 (44.2)                               | 2247 (46.6)                              | 6502 (49.7)                                | 5990 (50.4)                                  | 3440 (50.0)                                      |
| Smoke, no. (%)                                                                                                    |                              |                                             |                                           |                                          |                                            |                                              |                                                  |
| Never smoker                                                                                                      | 27492 (55.8)                 | 3077 (52.2)                                 | 3411 (51.0)                               | 2624 (54.4)                              | 7799 (59.6)                                | 6843 (57.6)                                  | 3738 (54.4)                                      |
| Former smoker                                                                                                     | 13062 (26.5)                 | 1906 (32.3)                                 | 2027 (30.3)                               | 1292 (26.8)                              | 2965 (22.7)                                | 2974 (25.0)                                  | 1898 (27.6)                                      |
| Current smoker                                                                                                    | 8684 (17.6)                  | 913 (15.5)                                  | 1247 (18.7)                               | 908 (18.8)                               | 2320 (17.7)                                | 2057 (17.3)                                  | 1239 (18.0)                                      |
| Hypertension, no. (%)                                                                                             | 30568 (62.1)                 | 3769 (63.9)                                 | 4077 (61.0)                               | 2993 (62.0)                              | 8052 (61.5)                                | 7370 (62.1)                                  | 4307 (62.6)                                      |
| Diabetes, no. (%)                                                                                                 | 13717 (27.9)                 | 1863 (31.6)                                 | 1996 (29.9)                               | 1360 (28.2)                              | 3301 (25.2)                                | 3315 (27.9)                                  | 1882 (27.4)                                      |
| Cancer, no. (%)                                                                                                   | 4558 ( 9.3)                  | 728 (12.3)                                  | 695 (10.4)                                | 443 ( 9.2)                               | 1043 ( 8.0)                                | 1014 ( 8.5)                                  | 635 ( 9.2)                                       |
| Cardiovascular disease, no. (%)                                                                                   | 10399 (21.1)                 | 1512 (25.6)                                 | 1706 (25.5)                               | 1048 (21.7)                              | 2307 (17.6)                                | 2368 (19.9)                                  | 1458 (21.2)                                      |
| Cerebrovascular disease, no. (%)                                                                                  | 5192 (10.5)                  | 801 (13.6)                                  | 1011 (15.1)                               | 503 (10.4)                               | 1091 ( 8.3)                                | 1112 ( 9.4)                                  | 674 ( 9.8)                                       |
| Dementia, no. (%)                                                                                                 | 5350 (10.9)                  | 887 (15.0)                                  | 1268 (19.0)                               | 586 (12.1)                               | 988 ( 7.6)                                 | 999 ( 8.4)                                   | 622 ( 9.0)                                       |
| Chronic kidney disease, no. (%)                                                                                   | 9573 (21.9)                  | 1390 (26.1)                                 | 1477 (26.2)                               | 963 (22.9)                               | 2161 (18.4)                                | 2237 (20.9)                                  | 1345 (21.8)                                      |
| Peripheral artery disease, no. (%)                                                                                | 1411 ( 2.9)                  | 247 ( 4.2)                                  | 261 ( 3.9)                                | 140 ( 2.9)                               | 301 ( 2.3)                                 | 277 ( 2.3)                                   | 185 ( 2.7)                                       |
| HIV, no. (%)                                                                                                      | 504 ( 1.0)                   | 91 ( 1.5)                                   | 75 ( 1.1)                                 | 58 ( 1.2)                                | 130 ( 1.0)                                 | 99 ( 0.8)                                    | 51 ( 0.7)                                        |
| Pneumonia, no. (%)                                                                                                | 765 ( 1.6)                   | 205 ( 3.5)                                  | 191 ( 2.9)                                | 83 ( 1.7)                                | 108 ( 0.8)                                 | 100 ( 0.8)                                   | 78 ( 1.1)                                        |
| COPD, no. (%)                                                                                                     | 7666 (15.6)                  | 1143 (19.4)                                 | 1285 (19.2)                               | 765 (15.9)                               | 1670 (12.8)                                | 1702 (14.3)                                  | 1101 (16.0)                                      |
| ADI rank category, no. (%)                                                                                        |                              |                                             |                                           |                                          |                                            |                                              |                                                  |
| 0 to 33.3                                                                                                         | 10248 (20.8)                 | 1816 (30.8)                                 | 2003 (30.0)                               | 1026 (21.3)                              | 2356 (18.0)                                | 1944 (16.4)                                  | 1103 (16.0)                                      |



|   |                            |              |             |             |             |             |             |             |
|---|----------------------------|--------------|-------------|-------------|-------------|-------------|-------------|-------------|
| 1 | 33.4 to 66.6               | 20861 (42.4) | 2203 (37.4) | 2594 (38.8) | 1967 (40.8) | 5788 (44.2) | 5113 (43.1) | 3196 (46.5) |
| 2 | 66.7 to 100                | 18129 (36.8) | 1877 (31.8) | 2088 (31.2) | 1831 (38.0) | 4940 (37.8) | 4817 (40.6) | 2576 (37.5) |
| 3 | COVID-19 testing capacity, |              |             |             |             |             |             |             |
| 4 | mean (SD),                 | 3.1 (1.9)    | 1.3 (0.9)   | 1.7 (1.0)   | 2.1 (1.2)   | 4.1 (2.1)   | 3.7 (1.6)   | 3.8 (1.7)   |
| 5 | per 10000 people           |              |             |             |             |             |             |             |
| 6 | Hospital occupancy,        | 37.0 (10.8)  | 41.3 (11.8) | 35.4 (9.9)  | 35.8 (10.2) | 36.5 (10.3) | 37.0 (10.5) | 36.8 (11.5) |
| 7 | mean (SD), %               |              |             |             |             |             |             |             |

8 ADI: area deprivation index; COPD: Chronic obstructive pulmonary disease; eGFR: Estimated Glomerular Filtration Rate; HIV: Human  
9 immunodeficiency virus; IQR: interquartile range; IQR: interquartile range; SD: standard deviation.

For peer review only

1  
2  
3  
4  
5  
6  
7  
8  
9  
10  
11  
12  
13  
14  
15  
16  
17  
18  
19  
20  
21  
22  
23  
24  
25  
26  
27  
28  
29  
30  
31  
32  
33  
34  
35  
36  
37  
38  
39  
40  
41  
42  
43  
44  
45  
46  
47

| <b>Supplemental Table 3B: Characteristics of hospitalized US Veterans with COVID-19 overall and by different month periods</b> |                             |                                             |                                           |                                         |                                           |                                             |                                                  |
|--------------------------------------------------------------------------------------------------------------------------------|-----------------------------|---------------------------------------------|-------------------------------------------|-----------------------------------------|-------------------------------------------|---------------------------------------------|--------------------------------------------------|
| <b>Characteristic</b>                                                                                                          | <b>Overall<br/>N = 9428</b> | <b>March 20 –<br/>April 19<br/>N = 1992</b> | <b>April 20 –<br/>May 19<br/>N = 1152</b> | <b>May 20 –<br/>June 19<br/>N = 966</b> | <b>June 20 –<br/>July 19<br/>N = 2274</b> | <b>July 20 –<br/>August 19<br/>N = 1872</b> | <b>August 20 –<br/>September 19<br/>N = 1172</b> |
| Age, median (IQR), year                                                                                                        | 70.6<br>(61.2-76.8)         | 70.7<br>(61.8, 76.7)                        | 72.2<br>(63.7-79.3)                       | 69.7<br>(59.7- 76.8)                    | 69.1<br>(58.9-75.6)                       | 70.8<br>(61.1-76.5)                         | 71.5<br>(62.3-77.2)                              |
| Race, no. (%)                                                                                                                  |                             |                                             |                                           |                                         |                                           |                                             |                                                  |
| White                                                                                                                          | 5054 (53.6)                 | 811 (40.7)                                  | 607 (52.7)                                | 533 (55.2)                              | 1255 (55.2)                               | 1081 (57.7)                                 | 767 (65.4)                                       |
| Black                                                                                                                          | 3809 (40.4)                 | 1084 (54.4)                                 | 496 (43.1)                                | 389 (40.3)                              | 861 (37.9)                                | 649 (34.7)                                  | 330 (28.2)                                       |
| Other                                                                                                                          | 565 ( 6.0)                  | 97 ( 4.9)                                   | 49 ( 4.3)                                 | 44 ( 4.6)                               | 158 ( 6.9)                                | 142 ( 7.6)                                  | 75 ( 6.4)                                        |
| Sex, no. (%), women                                                                                                            | 527 ( 5.6)                  | 95 ( 4.8)                                   | 53 ( 4.6)                                 | 73 ( 7.6)                               | 147 ( 6.5)                                | 112 ( 6.0)                                  | 47 ( 4.0)                                        |
| BMI category, no. (%)                                                                                                          |                             |                                             |                                           |                                         |                                           |                                             |                                                  |
| Underweight (<8.5 kg/m <sup>2</sup> )                                                                                          | 83 ( 0.9)                   | 24 ( 1.2)                                   | 14 ( 1.2)                                 | 10 ( 1.0)                               | 18 ( 0.8)                                 | 12 ( 0.6)                                   | 5 ( 0.4)                                         |
| Normal weight (18.5 to <25 kg/m <sup>2</sup> )                                                                                 | 1836 (19.5)                 | 387 (19.4)                                  | 276 (24.0)                                | 182 (18.8)                              | 423 (18.6)                                | 350 (18.7)                                  | 218 (18.6)                                       |
| Overweight (25 to <30 kg/m <sup>2</sup> )                                                                                      | 2922 (31.0)                 | 611 (30.7)                                  | 344 (29.9)                                | 322 (33.3)                              | 684 (30.1)                                | 582 (31.1)                                  | 379 (32.3)                                       |
| Obesity (>18.5 kg/m <sup>2</sup> )                                                                                             | 4587 (48.7)                 | 970 (48.7)                                  | 518 (45.0)                                | 452 (46.8)                              | 1149 (50.5)                               | 928 (49.6)                                  | 570 (48.6)                                       |
| Smoke, no. (%)                                                                                                                 |                             |                                             |                                           |                                         |                                           |                                             |                                                  |
| Never smoker                                                                                                                   | 4713 (50.0)                 | 913 (45.8)                                  | 511 (44.4)                                | 474 (49.1)                              | 1250 (55.0)                               | 980 (52.4)                                  | 585 (49.9)                                       |
| Former smoker                                                                                                                  | 2956 (31.4)                 | 766 (38.5)                                  | 409 (35.5)                                | 283 (29.3)                              | 607 (26.7)                                | 535 (28.6)                                  | 356 (30.4)                                       |
| Current smoker                                                                                                                 | 1759 (18.7)                 | 313 (15.7)                                  | 232 (20.1)                                | 209 (21.6)                              | 417 (18.3)                                | 357 (19.1)                                  | 231 (19.7)                                       |
| Hypertension, no. (%)                                                                                                          | 6347 (67.3)                 | 1345 (67.5)                                 | 763 (66.2)                                | 649 (67.2)                              | 1546 (68.0)                               | 1264 (67.5)                                 | 780 (66.6)                                       |
| Diabetes, no. (%)                                                                                                              | 3695 (39.2)                 | 798 (40.1)                                  | 473 (41.1)                                | 386 (40.0)                              | 856 (37.6)                                | 715 (38.2)                                  | 467 (39.8)                                       |
| Cancer, no. (%)                                                                                                                | 1443 (15.3)                 | 346 (17.4)                                  | 169 (14.7)                                | 150 (15.5)                              | 328 (14.4)                                | 261 (13.9)                                  | 189 (16.1)                                       |
| Cardiovascular disease, no. (%)                                                                                                | 3417 (36.2)                 | 735 (36.9)                                  | 453 (39.3)                                | 338 (35.0)                              | 773 (34.0)                                | 674 (36.0)                                  | 444 (37.9)                                       |
| Cerebrovascular disease, no. (%)                                                                                               | 1836 (19.5)                 | 403 (20.2)                                  | 279 (24.2)                                | 179 (18.5)                              | 399 (17.5)                                | 328 (17.5)                                  | 248 (21.2)                                       |
| Dementia, no. (%)                                                                                                              | 1953 (20.7)                 | 420 (21.1)                                  | 345 (29.9)                                | 212 (21.9)                              | 398 (17.5)                                | 336 (17.9)                                  | 242 (20.6)                                       |
| Chronic kidney disease, no. (%)                                                                                                | 3042 (34.9)                 | 704 (37.8)                                  | 368 (35.9)                                | 293 (33.2)                              | 716 (33.7)                                | 575 (33.3)                                  | 386 (35.5)                                       |
| Peripheral artery disease, no. (%)                                                                                             | 543 ( 5.8)                  | 127 ( 6.4)                                  | 87 ( 7.6)                                 | 59 ( 6.1)                               | 120 ( 5.3)                                | 92 ( 4.9)                                   | 58 ( 4.9)                                        |
| HIV, no. (%)                                                                                                                   | 141 ( 1.5)                  | 44 ( 2.2)                                   | 16 ( 1.4)                                 | 12 ( 1.2)                               | 40 ( 1.8)                                 | 23 ( 1.2)                                   | 6 ( 0.5)                                         |
| Pneumonia, no. (%)                                                                                                             | 336 ( 3.6)                  | 104 ( 5.2)                                  | 59 ( 5.1)                                 | 37 ( 3.8)                               | 51 ( 2.2)                                 | 50 ( 2.7)                                   | 35 ( 3.0)                                        |
| COPD, no. (%)                                                                                                                  | 2429 (25.8)                 | 524 (26.3)                                  | 311 (27.0)                                | 251 (26.0)                              | 549 (24.1)                                | 462 (24.7)                                  | 332 (28.3)                                       |
| ADI rank category, no. (%)                                                                                                     |                             |                                             |                                           |                                         |                                           |                                             |                                                  |
| 0 to 33.3                                                                                                                      | 1785 (18.9)                 | 583 (29.3)                                  | 290 (25.2)                                | 169 (17.5)                              | 335 (14.7)                                | 249 (13.3)                                  | 159 (13.6)                                       |
| 33.4 to 66.6                                                                                                                   | 3643 (38.6)                 | 671 (33.7)                                  | 454 (39.4)                                | 383 (39.6)                              | 904 (39.8)                                | 733 (39.2)                                  | 498 (42.5)                                       |
| 66.7 to 100                                                                                                                    | 4000 (42.4)                 | 738 (37.0)                                  | 408 (35.4)                                | 414 (42.9)                              | 1035 (45.5)                               | 890 (47.5)                                  | 515 (43.9)                                       |

|                                                                                                                                                                                                            |             |             |            |            |            |             |             |
|------------------------------------------------------------------------------------------------------------------------------------------------------------------------------------------------------------|-------------|-------------|------------|------------|------------|-------------|-------------|
| COVID-19 testing capacity, mean (SD), per 10000 people                                                                                                                                                     | 2.8 (1.8)   | 1.2 (0.9)   | 1.6 (0.8)  | 2.1 (1.1)  | 3.9 (1.5)  | 3.8 (1.4)   | 4.0 (1.7)   |
| Hospital occupancy, mean (SD), %                                                                                                                                                                           | 38.1 (10.5) | 42.4 (11.3) | 35.0 (9.7) | 36.1 (8.9) | 38.1 (9.4) | 37.1 (10.4) | 37.0 (10.6) |
| ADI: area deprivation index; COPD: Chronic obstructive pulmonary disease; eGFR: Estimated Glomerular Filtration Rate; HIV: Human immunodeficiency virus; IQR: interquartile range; SD: standard deviation. |             |             |            |            |            |             |             |

For peer review only

1  
2  
3  
4  
5  
6  
7  
8  
9  
10  
11  
12  
13  
14  
15  
16  
17  
18  
19  
20  
21  
22  
23  
24  
25  
26  
27  
28  
29  
30  
31  
32  
33  
34  
35  
36  
37  
38  
39  
40  
41  
42  
43  
44  
45  
46  
47

**Supplemental Table 4** Contribution of changes in demographic, health, and contextual characteristics to temporal differences in outcomes between 3/20–4/19, 2020 and 6/20–7/20, 2020

| Factors                                                                                                                              | Among Veterans with COVID-19  |                                                           |                              |                                                           | Among hospitalized Veterans with COVID-19 |                                                           |
|--------------------------------------------------------------------------------------------------------------------------------------|-------------------------------|-----------------------------------------------------------|------------------------------|-----------------------------------------------------------|-------------------------------------------|-----------------------------------------------------------|
|                                                                                                                                      | 30-day mortality rate changes |                                                           | Hospitalization rate changes |                                                           | 30-day mortality rate changes             |                                                           |
|                                                                                                                                      | Predicted rate of change      | Percent contribution to total change (predicted/observed) | Predicted rate of change     | Percent contribution to total change (predicted/observed) | Predicted rate of change                  | Percent contribution to total change (predicted/observed) |
| Demographics                                                                                                                         | -2.4%                         | 26.1%                                                     | -3.3%                        | 19.6%                                                     | -3.0%                                     | 23.6%                                                     |
| Health characteristics                                                                                                               | -0.7%                         | 7.6%                                                      | -1.5%                        | 9.0%                                                      | -0.3%                                     | 2.4%                                                      |
| Contextual characteristics                                                                                                           | 0.1%                          | -1.1%                                                     | 0.1%                         | -0.6%                                                     | 0.1%                                      | -0.8%                                                     |
| COVID-19 testing capacity                                                                                                            | -0.5%                         | 5.4%                                                      | -0.9%                        | 5.4%                                                      | -0.2%                                     | 1.6%                                                      |
| Hospital occupancy                                                                                                                   | -0.2%                         | 2.2%                                                      |                              |                                                           | -0.4%                                     | 3.1%                                                      |
| <b>Net rate of change predicted by demographic, health, contextual characteristics, testing capacity, and hospital occupancy (A)</b> | <b>-3.7%</b>                  | <b>40.2%</b>                                              | <b>-5.6%</b>                 | <b>33.3%</b>                                              | <b>-3.8%</b>                              | <b>29.9%</b>                                              |
| Observed rate of change (B)                                                                                                          | -9.2%                         |                                                           | -16.8%                       |                                                           | -12.7%                                    |                                                           |
| Epidemiological change (difference between observed and net predicted rate of change) (B)-(A)                                        | -5.5%                         | 59.8%                                                     | -11.2%                       | 66.7%                                                     | -8.9%                                     | 70.1%                                                     |

Demographics include age, race, and gender; Health characteristics include BMI, diabetes, cancer, cardiovascular disease, cerebrovascular disease, chronic kidney disease, dementia, HIV, hypertension, peripheral artery disease, pneumonia, and smoking status; contextual factors include ADI; epidemiological change includes the 30-day periods of testing positive dates.

1  
2  
3  
4  
5  
6  
7  
8  
9  
10  
11  
12  
13  
14  
15  
16  
17  
18  
19  
20  
21  
22  
23  
24  
25  
26  
27  
28  
29  
30  
31  
32  
33  
34  
35  
36  
37  
38  
39  
40  
41  
42  
43  
44  
45  
46  
47  
48  
49  
50  
51  
52  
53  
54  
55  
56  
57  
58  
59  
60

## STROBE Statement—checklist of items that should be included in reports of observational studies

|                              | Page | Recommendation                                                                                                                                                                                                                                                                                                                                                                                                                                                                                                                                                                                                                                                                                   |
|------------------------------|------|--------------------------------------------------------------------------------------------------------------------------------------------------------------------------------------------------------------------------------------------------------------------------------------------------------------------------------------------------------------------------------------------------------------------------------------------------------------------------------------------------------------------------------------------------------------------------------------------------------------------------------------------------------------------------------------------------|
| <b>Title and abstract</b>    | 1    | (a) Indicate the study's design with a commonly used term in the title or the abstract<br>(b) Provide in the abstract an informative and balanced summary of what was done and what was found                                                                                                                                                                                                                                                                                                                                                                                                                                                                                                    |
| <b>Introduction</b>          |      |                                                                                                                                                                                                                                                                                                                                                                                                                                                                                                                                                                                                                                                                                                  |
| Background/rationale         | 4    | Explain the scientific background and rationale for the investigation being reported                                                                                                                                                                                                                                                                                                                                                                                                                                                                                                                                                                                                             |
| Objectives                   | 4    | State specific objectives, including any prespecified hypotheses                                                                                                                                                                                                                                                                                                                                                                                                                                                                                                                                                                                                                                 |
| <b>Methods</b>               |      |                                                                                                                                                                                                                                                                                                                                                                                                                                                                                                                                                                                                                                                                                                  |
| Study design                 | 4    | Present key elements of study design early in the paper                                                                                                                                                                                                                                                                                                                                                                                                                                                                                                                                                                                                                                          |
| Setting                      | 4    | Describe the setting, locations, and relevant dates, including periods of recruitment, exposure, follow-up, and data collection                                                                                                                                                                                                                                                                                                                                                                                                                                                                                                                                                                  |
| Participants                 | 5    | (a) <i>Cohort study</i> —Give the eligibility criteria, and the sources and methods of selection of participants. Describe methods of follow-up<br><i>Case-control study</i> —Give the eligibility criteria, and the sources and methods of case ascertainment and control selection. Give the rationale for the choice of cases and controls<br><i>Cross-sectional study</i> —Give the eligibility criteria, and the sources and methods of selection of participants<br>(b) <i>Cohort study</i> —For matched studies, give matching criteria and number of exposed and unexposed<br><i>Case-control study</i> —For matched studies, give matching criteria and the number of controls per case |
| Variables                    | 6    | Clearly define all outcomes, exposures, predictors, potential confounders, and effect modifiers. Give diagnostic criteria, if applicable                                                                                                                                                                                                                                                                                                                                                                                                                                                                                                                                                         |
| Data sources/<br>measurement | 5    | For each variable of interest, give sources of data and details of methods of assessment (measurement). Describe comparability of assessment methods if there is more than one group                                                                                                                                                                                                                                                                                                                                                                                                                                                                                                             |
| Bias                         | 5    | Describe any efforts to address potential sources of bias                                                                                                                                                                                                                                                                                                                                                                                                                                                                                                                                                                                                                                        |
| Study size                   | 9    | Explain how the study size was arrived at                                                                                                                                                                                                                                                                                                                                                                                                                                                                                                                                                                                                                                                        |
| Quantitative variables       | 6-7  | Explain how quantitative variables were handled in the analyses. If applicable, describe which groupings were chosen and why                                                                                                                                                                                                                                                                                                                                                                                                                                                                                                                                                                     |
| Statistical methods          | 7-8  | (a) Describe all statistical methods, including those used to control for confounding<br>(b) Describe any methods used to examine subgroups and interactions<br>(c) Explain how missing data were addressed<br>(d) <i>Cohort study</i> —If applicable, explain how loss to follow-up was addressed<br><i>Case-control study</i> —If applicable, explain how matching of cases and controls was addressed<br><i>Cross-sectional study</i> —If applicable, describe analytical methods taking account of sampling strategy<br>(e) Describe any sensitivity analyses                                                                                                                                |

Continued on next page

| <b>Results</b>           |    |                                                                                                                                                                                                                                                                                                                                                                                                               |
|--------------------------|----|---------------------------------------------------------------------------------------------------------------------------------------------------------------------------------------------------------------------------------------------------------------------------------------------------------------------------------------------------------------------------------------------------------------|
| Participants             | 9  | (a) Report numbers of individuals at each stage of study—eg numbers potentially eligible, examined for eligibility, confirmed eligible, included in the study, completing follow-up, and analysed<br>(b) Give reasons for non-participation at each stage<br>(c) Consider use of a flow diagram                                                                                                               |
| Descriptive data         | 9  | (a) Give characteristics of study participants (eg demographic, clinical, social) and information on exposures and potential confounders<br>(b) Indicate number of participants with missing data for each variable of interest<br>(c) <i>Cohort study</i> —Summarise follow-up time (eg, average and total amount)                                                                                           |
| Outcome data             | 9  | <i>Cohort study</i> —Report numbers of outcome events or summary measures over time<br><i>Case-control study</i> —Report numbers in each exposure category, or summary measures of exposure<br><i>Cross-sectional study</i> —Report numbers of outcome events or summary measures                                                                                                                             |
| Main results             | 10 | (a) Give unadjusted estimates and, if applicable, confounder-adjusted estimates and their precision (eg, 95% confidence interval). Make clear which confounders were adjusted for and why they were included<br>(b) Report category boundaries when continuous variables were categorized<br>(c) If relevant, consider translating estimates of relative risk into absolute risk for a meaningful time period |
| Other analyses           | 10 | Report other analyses done—eg analyses of subgroups and interactions, and sensitivity analyses                                                                                                                                                                                                                                                                                                                |
| <b>Discussion</b>        |    |                                                                                                                                                                                                                                                                                                                                                                                                               |
| Key results              | 12 | Summarise key results with reference to study objectives                                                                                                                                                                                                                                                                                                                                                      |
| Limitations              | 14 | Discuss limitations of the study, taking into account sources of potential bias or imprecision. Discuss both direction and magnitude of any potential bias                                                                                                                                                                                                                                                    |
| Interpretation           | 14 | Give a cautious overall interpretation of results considering objectives, limitations, multiplicity of analyses, results from similar studies, and other relevant evidence                                                                                                                                                                                                                                    |
| Generalisability         | 14 | Discuss the generalisability (external validity) of the study results                                                                                                                                                                                                                                                                                                                                         |
| <b>Other information</b> |    |                                                                                                                                                                                                                                                                                                                                                                                                               |
| Funding                  | 15 | Give the source of funding and the role of the funders for the present study and, if applicable, for the original study on which the present article is based                                                                                                                                                                                                                                                 |

\*Give information separately for cases and controls in case-control studies and, if applicable, for exposed and unexposed groups in cohort and cross-sectional studies.

**Note:** An Explanation and Elaboration article discusses each checklist item and gives methodological background and published examples of transparent reporting. The STROBE checklist is best used in conjunction with this article (freely available on the Web sites of PLoS Medicine at <http://www.plosmedicine.org/>, Annals of Internal Medicine at <http://www.annals.org/>, and Epidemiology at <http://www.epidem.com/>). Information on the STROBE Initiative is available at [www.strobe-statement.org](http://www.strobe-statement.org).

# BMJ Open

## Temporal Trends of COVID-19 Mortality and Hospitalization Rates: An observational cohort study from the US Department of Veterans Affairs

|                                 |                                                                                                                                                                                                                                                                                                                          |
|---------------------------------|--------------------------------------------------------------------------------------------------------------------------------------------------------------------------------------------------------------------------------------------------------------------------------------------------------------------------|
| Journal:                        | <i>BMJ Open</i>                                                                                                                                                                                                                                                                                                          |
| Manuscript ID                   | bmjopen-2020-047369.R1                                                                                                                                                                                                                                                                                                   |
| Article Type:                   | Original research                                                                                                                                                                                                                                                                                                        |
| Date Submitted by the Author:   | 06-Apr-2021                                                                                                                                                                                                                                                                                                              |
| Complete List of Authors:       | Cai, Miao; VA Saint Louis Health Care System Clinical Epidemiology Center<br>Bowe, Benjamin; VA Saint Louis Health Care System Clinical Epidemiology Center<br>Xie, Yan; VA Saint Louis Health Care System Clinical Epidemiology Center<br>Al-Aly, Ziyad; VA Saint Louis Health Care System Clinical Epidemiology Center |
| <b>Primary Subject Heading</b>: | Epidemiology                                                                                                                                                                                                                                                                                                             |
| Secondary Subject Heading:      | Epidemiology, Infectious diseases, Public health                                                                                                                                                                                                                                                                         |
| Keywords:                       | COVID-19, Epidemiology < INFECTIOUS DISEASES, GENERAL MEDICINE (see Internal Medicine)                                                                                                                                                                                                                                   |
|                                 |                                                                                                                                                                                                                                                                                                                          |

SCHOLARONE™  
Manuscripts



I, the Submitting Author has the right to grant and does grant on behalf of all authors of the Work (as defined in the below author licence), an exclusive licence and/or a non-exclusive licence for contributions from authors who are: i) UK Crown employees; ii) where BMJ has agreed a CC-BY licence shall apply, and/or iii) in accordance with the terms applicable for US Federal Government officers or employees acting as part of their official duties; on a worldwide, perpetual, irrevocable, royalty-free basis to BMJ Publishing Group Ltd ("BMJ") its licensees and where the relevant Journal is co-owned by BMJ to the co-owners of the Journal, to publish the Work in this journal and any other BMJ products and to exploit all rights, as set out in our [licence](#).

The Submitting Author accepts and understands that any supply made under these terms is made by BMJ to the Submitting Author unless you are acting as an employee on behalf of your employer or a postgraduate student of an affiliated institution which is paying any applicable article publishing charge ("APC") for Open Access articles. Where the Submitting Author wishes to make the Work available on an Open Access basis (and intends to pay the relevant APC), the terms of reuse of such Open Access shall be governed by a Creative Commons licence – details of these licences and which [Creative Commons](#) licence will apply to this Work are set out in our licence referred to above.

Other than as permitted in any relevant BMJ Author's Self Archiving Policies, I confirm this Work has not been accepted for publication elsewhere, is not being considered for publication elsewhere and does not duplicate material already published. I confirm all authors consent to publication of this Work and authorise the granting of this licence.



1  
2  
3 Temporal Trends of COVID-19 Mortality and Hospitalization Rates: An observational cohort study from the US  
4 Department of Veterans Affairs

5 **Miao Cai<sup>a,b</sup>, PhD; Benjamin Bowe<sup>a,b,c</sup>, MPH; Yan Xie<sup>a,b,c</sup>, MPH; and Ziyad Al-Aly<sup>a,b,d,e,f</sup> MD**

6  
7  
8 <sup>a</sup> Clinical Epidemiology Center, Research and Development Service, VA Saint Louis Health  
9 Care System, Saint Louis, Missouri

10  
11 <sup>b</sup> Veterans Research & Education Foundation of St. Louis, Saint Louis, Missouri

12  
13 <sup>c</sup> Department of Epidemiology and Biostatistics, College for Public Health and Social Justice,  
14 Saint Louis University, Saint Louis, Missouri

15  
16 <sup>d</sup> Department of Medicine, Washington University School of Medicine, Saint Louis, Missouri

17  
18  
19 <sup>e</sup> Nephrology Section, Medicine Service, VA Saint Louis Health Care System,  
20 Saint Louis, Missouri

21  
22 <sup>f</sup> Institute for Public Health, Washington University in Saint Louis, Saint Louis, Missouri

23  
24  
25 **Running title: Temporal Trends in COVID-19 Mortality and Hospitalization**

26  
27  
28 **Conflict of Interest Disclosures:** None.

29  
30  
31 **Funding:** This study was funded by the United States Department of Veterans Affairs (grant  
32 number 1I21HX002995-01A1).

33  
34  
35  
36 **Word count: 2875**

37 **Tables & Figures: 6**

38  
39  
40 **Corresponding Author:**

41 Ziyad Al-Aly, M.D.

42 VA Saint Louis Health Care System

43 915 North Grand Boulevard, 151-JC

44 Saint Louis, MO 63106

45 Telephone: (314) 289-6333

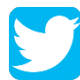

Twitter [@zalaly](https://twitter.com/zalaly)

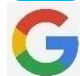

Email: [zalaly@gmail.com](mailto:zalaly@gmail.com)

## Abstract

**Objective:** To investigate the temporal trends of 30-day mortality and hospitalization in United States Veterans with COVID-19 and 30-day mortality in hospitalized Veterans with COVID-19; and to decompose the contribution of changes in the underlying characteristics of affected populations to these temporal changes.

**Design:** Observational cohort study.

**Setting:** US Department of Veteran Affairs.

**Participants:** 49 238 United States Veterans with a positive COVID-19 test between March 20, 2020 and September 19, 2020; and 9 428 United States Veterans hospitalized with a positive COVID-19 test during the same period.

**Outcome measures:** 30-day mortality rate and hospitalization rate.

**Results:** Between March 20, 2020 and September 19, 2020 and in COVID-19 positive individuals, 30-day mortality rate dropped by 9.2% from 13.6% to 4.4%; hospitalization rate dropped by 16.8% from 33.8% to 17.0%. In hospitalized COVID-19 individuals, 30-day mortality rate dropped by 12.7% from 23.5% to 10.8%. Among COVID-19 positive individuals, decomposition analyses suggested that changes in demographic, health and contextual characteristics, COVID-19 testing capacity, and hospital occupancy accounted for 40.2% and 33.3% of the decline in 30-day mortality and hospitalization, respectively. Changes in the underlying characteristics of hospitalized COVID-19 individuals accounted for 29.9% of the decline in 30-day mortality.

1  
2  
3 **Conclusion:** Between March and September 2020, changes in demographic and health  
4 characteristics of people infected with COVID-19 contributed measurably to the substantial  
5 decline in 30-day mortality and hospitalization.  
6  
7  
8  
9  
10  
11  
12

### 13 **Strengths and limitations of the study**

- 14  
15  
16 • National large-scale individual-level data from the US Department of Veterans Affairs  
17 which operated the largest integrated health care system in the United States.
- 18  
19  
20 • Advanced decomposition methods disentangle the influence of changes in  
21 demographics and health characteristics on temporal trends of 30-day mortality and  
22 hospital rates.
- 23  
24  
25 • The study accounted for important but less studied drivers of change in mortality and  
26 hospitalization including contextual variables, testing capacity, and hospital occupancy  
27 rates.
- 28  
29  
30 • The Veteran population includes mostly older White males, which may limit the  
31 generalizability.  
32  
33  
34  
35  
36  
37  
38  
39  
40  
41  
42  
43  
44  
45  
46  
47  
48  
49  
50  
51  
52  
53  
54  
55  
56  
57  
58  
59  
60

## Introduction

Reports from regional health systems and the Center of Disease Control suggest substantial temporal variations in COVID-19 mortality rates<sup>1-3</sup>; however, a national temporal analysis of mortality and hospitalization rates accounting for individual-level characteristics is lacking and the relative contribution of changes in demographic and health characteristics of people infected with COVID-19 to temporal differences in mortality rates is not clear.

A deeper understanding of the changes in hospitalization and mortality rates and the drivers of such changes in the first wave of the pandemic will aid effort to optimize management of future waves of this global pandemic.

In this work, we leveraged the breadth and depth of the United States Department of Veterans Affairs electronic health care databases to describe temporal changes in mortality rates and hospitalization among COVID-19 positive Veterans, and temporal changes in mortality rates of hospitalized veterans with COVID-19. We then decomposed the contribution of changes in demographic, health, contextual characteristics to these temporal changes.

## Methods

### ***Identification of COVID-19 test positive individuals***

Using the comprehensive COVID-19 Shared Data Resource (CSDR)<sup>4 5</sup> developed by the Department of Veterans Affairs (VA), we identified unique US Veterans with their first laboratory confirmed COVID-19 positive test between March 20, 2020 and September 19, 2020. The CSDR captures COVID-19 cases based on laboratory results that comply with

Centers for Disease Control and Prevention standards, including 2019-nCoV RT-PCR (reverse transcription-polymerase chain reaction) Diagnostic Panel and the SARS-CoV-2 Multiplex Assay, or human-confirmed case review<sup>5</sup>. The VA had its first COVID-19 positive patient on March 02, 2020. In this study, March 20, 2020 was selected as the first day of observation where it was the first day that VA had more than 100 COVID-19 positive patients nationally, facilitating stabilization of rate calculations. September 19, 2020 was selected as the last day of observation to ensure 30 days of follow-up for observation of outcomes.

### **Data sources**

Data were obtained from the VA CSDR<sup>4</sup> and Corporate Data Warehouse (CDW)<sup>6-18</sup>, which provides electronic health record information during routine healthcare. Demographic information and dates of death were collected from the CDW SPatient domain. Patient clinical diagnoses, procedures, and hospitalization characteristics were obtained from the CDW Outpatient Encounter and Inpatient Encounter domains. Smoking status was obtained from the CDA Health Factors domain. Laboratory results, including serum creatinine, were obtained from the CDW Patient Laboratory Chemistry domain. Data on height, weight, and blood pressure were procured from the CDW Vital Signs domain. The CDW Outpatient Pharmacy domain was used to obtain diabetes medication data. The Planning System Support Group Enrollee provided the Federal Information Processing Standard (FIPS) code of residence. The 2015 Area Deprivation Index (ADI) were obtained from the University of Wisconsin. The ADI is a composite measure of a census block group's socio-economic disadvantage, and is constructed from data elements including education, employment, housing quality, and poverty measures<sup>19</sup>.

### **Outcomes**

1  
2  
3 We examined the temporal trends in a) rates of 30-day mortality and hospitalization among  
4 those with a positive COVID-19 test, and b) rates of 30-day mortality among those hospitalized  
5 with COVID-19. 30-day mortality was defined as all-cause mortality occurring within the 30  
6 days after the participant's first COVID-19 positive test. Hospitalization is defined by a hospital  
7 admission between 5 days before and 30 days after the first COVID-19 positive test.  
8  
9  
10  
11  
12  
13

### 14 ***Participant characteristics***

15  
16  
17  
18 Race was categorized as White, Black, and other. Health features included body weight index  
19 (BMI) and smoking status. BMI was computed from the last measurements of the participant's  
20 height and weight prior and closest to the first COVID-19 positive test date. Smoking status  
21 was categorized as never smoker, former smoker, and current smoker, based on the most  
22 recent record prior to the first COVID-19 positive test. Comorbidities included cancer,  
23 cardiovascular disease, cerebrovascular disease, chronic kidney disease, chronic obstructive  
24 pulmonary disease (COPD), dementia, diabetes mellitus, human immunodeficiency virus  
25 (HIV), hypertension, peripheral artery disease, and pneumonia. Cancer, cardiovascular  
26 disease, cerebrovascular disease, dementia, HIV, peripheral artery disease, pneumonia, and  
27 COPD were identified in the two years prior to testing positive for COVID-19 through  
28 International Classification of Diseases Tenth Version Clinical Modification diagnosis codes<sup>18</sup>  
29  
30  
31  
32  
33  
34  
35  
36  
37  
38  
39  
40  
41  
42  
43  
44  
45  
46  
47  
48  
49  
50  
51  
52  
53  
54  
55  
56  
57  
58  
59  
60

20. Chronic kidney disease was defined as baseline estimated glomerular filtration rate (eGFR) lower than 60 mL/min/1.73m<sup>2</sup>. Baseline eGFR was calculated using the CKD-EPI equation<sup>21</sup> and was assessed as the Veteran's last outpatient value prior to the date of first COVID-19 test positive. Participants who had no measurement of baseline eGFR (N=5 447, 11.1% for Veterans with COVID-19; N=717, 7.6% for hospitalized Veterans with COVID-19) were assumed to have no chronic kidney disease. Diabetes was defined as any use of

1  
2  
3 antihyperglycemic medications<sup>22 23</sup> or incidence of hemoglobin A1C greater or equal to 6.5%<sup>24</sup>.  
4  
5 Hypertension was defined as median systolic blood pressure greater than or equal to 130  
6  
7 mmHg or median diastolic blood pressure greater than or equal to 80 mmHg in one year<sup>25</sup>.  
8  
9  
10 Participants who had no measurement of blood pressure (N=2 699, 5.5% for Veterans with  
11  
12 COVID-19; N=235, 2.5% for hospitalized Veterans with COVID-19) were assumed to have no  
13  
14 chronic kidney disease. ADI is a composite measure of a geographic location's socio-  
15  
16 economic disadvantage, and ranges from 0 (low disadvantage) to 100 (high disadvantage).  
17  
18 County level ADI of the participants was assigned based on the participant's FIPS code of  
19  
20 residence location at the first COVID-19 positive test date. Mean imputation was applied to  
21  
22 missing values of covariates including BMI (missing = 111, 0.2% of Veterans with COVID-19;  
23  
24 missing = 11, 0.1% of hospitalized Veterans with COVID-19) and ADI (missing = 1303, 2.6% of  
25  
26 Veterans with COVID-19; missing = 88, 1.0% of hospitalized Veterans with COVID-19).  
27  
28 COVID-19 testing capacity was calculated as 7-day averages of the number of COVID-19 tests  
29  
30 conducted in a hospital system divided by the total number of veterans served in that hospital  
31  
32 system in the last calendar year. Hospital occupancy was defined as the percentage of beds  
33  
34 occupied by hospitalized patients in a hospital system within a calendar week. COVID-19  
35  
36 testing capacity and hospital occupancy were linked to the Veterans by the hospital system in  
37  
38 which the individuals had their first positive COVID-19 test.  
39  
40  
41  
42  
43  
44

### 45 ***Statistical analyses***

46  
47  
48 We calculated and plotted 7-day moving averages of crude and standardized 30-day mortality  
49  
50 and hospitalization rates in COVID-19 positive participants, as well as 30-day mortality rates in  
51  
52 hospitalized COVID-19 positive participants. The 7-day range included the current day, and the  
53  
54 three days before and after. Standardized rates were adjusted for age, race, gender, health  
55  
56  
57  
58  
59

1  
2  
3 behaviors (smoking status and BMI), comorbidities, and ADI through indirect standardization<sup>26</sup>.

4  
5 The standardization was based on the ratio difference between expected and observed  
6  
7 number of outcomes, where expected number of outcomes were estimated from individual-  
8  
9 level logistic regressions.  
10

11  
12  
13 To understand driving factors of the temporal trends in the outcomes, we decomposed the  
14  
15 contribution of the changes in key participant characteristics to changes in the observed rates  
16  
17 of outcomes over time. We first constructed individual-level logistic regression models for the  
18  
19 different outcomes using four sets of factor domains: demographics (age, race, gender), health  
20  
21 characteristics (BMI, diabetes, cancer, cardiovascular disease, cerebrovascular disease,  
22  
23 chronic kidney disease, dementia, HIV, hypertension, peripheral artery disease, pneumonia,  
24  
25 and smoking status), contextual factors (ADI), COVID-19 testing capacity, and hospital  
26  
27 occupancy. Hospital occupancy rate was not included as a predictor of hospitalization since  
28  
29 they are measuring the same variable. For each individual, we then computed the expected  
30  
31 probabilities of the outcome based on a participant's observed characteristics and under a  
32  
33 reference characteristics set, where probability of the outcome was minimized (age was set as  
34  
35 zero, and other categorical variables were set to be the reference group). We estimated the  
36  
37 additive contribution of the six sets of factor domains to the estimated rates of the outcome  
38  
39 using decomposition analysis<sup>27</sup>. Then the change in outcome rates between the first (March 20  
40  
41 to April 19) and the last (August 20 to September 19) 30 day periods associated with each  
42  
43 domain were calculated by taking the difference of the contributions between the two periods.  
44  
45  
46  
47  
48  
49

50 All statistical tests were two sided, and a p-value less than 0.05 or a 95% confidence interval  
51  
52 that did not contain unity was considered statistically significant. Statistical analyses and data  
53  
54 visualization were performed using SAS Enterprise Guide version 7.1 (SAS Institute, Cary,  
55  
56  
57  
58  
59



1  
2  
3 NC) and R 4.0.2<sup>28</sup>. The participants were not involved in the design, or conduct, or reporting, or  
4  
5 dissemination plans of the study.  
6  
7

### 8 **Ethics approval statement**

9

10  
11 The study was approved by the Institutional Review Board of the Department of Veterans  
12  
13 Affairs St Louis Health Care System, St Louis, MO (approval number: 1163689). The  
14  
15 requirement for informed consent was waived as the risk to participants was intangible.  
16  
17

### 18 **Patient and public involvement**

19

20  
21 No patients were involved in developing the hypothesis, the specific aims, or the research questions,  
22  
23 nor were they involved in developing plans for design or implementation of the study. No patients were  
24  
25 involved in the interpretation or writing up of results.  
26  
27

### 28 **Results**

29

30  
31 Between March 20, 2020 and September 19, 2020, we identified 49 238 US Veterans who  
32  
33 tested positive for COVID-19 and 9 428 US Veterans hospitalized with COVID-19.  
34  
35

36 Characteristics of the two cohorts are reported in Table 1. Among individuals with COVID-19,  
37  
38 the median age was 63.3 years (interquartile range [IQR], 49.8 to 73.1 years); 60.6% were  
39  
40 White, 33.9% were Black, and 11.5% were women. Among hospitalized individuals, the  
41  
42 median age was 70.6 years (IQR 61.2 to 76.8 years), 53.6% were White, 40.4% were Black,  
43  
44 and 6.0% were women.  
45  
46  
47

### 48 **Temporal trends in 30-day mortality and hospitalization rates**

49

50  
51 Between March 20, 2020 and September 19, 2020 and among individuals with a COVID-19  
52  
53 positive test the 30-day mortality rate dropped by 9.2% from 13.6% to 4.4%; the hospitalization  
54  
55 rate dropped by 16.8% from 33.8% to 17.0% (Table 2 and Figure 1). Among hospitalized  
56  
57  
58  
59  
60

1  
2  
3 individuals with COVID-19, the 30-day mortality rate dropped by 12.7% from 23.5% to 10.8%  
4  
5 (Table 2 and Figure 1). After accounting for demographics, contextual factors, health  
6  
7 characteristics, COVID-19 testing capacity, and hospital occupancy, standardized rates  
8  
9 showed consistent decline during the period (Figure 1).  
10  
11

12  
13 Between March 20, 2020 and September 19, 2020 and among hospitalized individuals with  
14  
15 COVID-19, we observed consistent decline in healthcare resource utilization including decline  
16  
17 in rates of intensive care unit (ICU) admission, mechanical ventilator use, and length of  
18  
19 hospital stay (Supplemental Table 1). The rate of ICU stay dropped by 4% from 35.6% to  
20  
21 31.6%; the rate of mechanical ventilator use dropped by 11.3% from 20.6% to 9.3%; the mean  
22  
23 length of stay dropped by 4.2 days from 13.8 to 9.6 days.  
24  
25

### 26 27 **Predictors of 30-day mortality and hospitalization**

28  
29  
30 Adjusted odds ratios for the association between potential predictors and risk of 30-day  
31  
32 mortality and hospitalization among Veterans with COVID-19, as well as risk of 30-day  
33  
34 mortality among hospitalized Veterans with COVID-19 are presented in Table 3. Among  
35  
36 Veterans with COVID-19, older age, Black and other race, male gender, current smoker,  
37  
38 diabetes, cancer, cardiovascular disease, dementia, chronic kidney disease, pneumonia,  
39  
40 COPD, and higher hospital occupancy rate were associated with higher risk of 30-day mortality  
41  
42 and hospitalization; higher COVID-19 testing capacity was associated with lower risk of 30-day  
43  
44 mortality and hospitalization. Among hospitalized Veterans with COVID-19, older age, male  
45  
46 gender, obesity, current smoker, diabetes, cardiovascular disease, chronic kidney disease,  
47  
48 dementia, and higher hospital occupancy rate were associated with higher risk of 30-day  
49  
50 mortality; higher COVID-19 testing capacity was associated with lower risk of 30-day mortality.  
51  
52  
53 The models for 30-day mortality and hospitalization among those who tested positive, and the  
54  
55  
56  
57  
58  
59  
60

1  
2  
3 model for 30-day mortality among hospitalized achieved reasonably good predictive  
4 performance, with the c-statistics of 0.834, 0.718, and 0.746, respectively. The c-statistics for  
5 nested models, showing the predictive performance improvement when adding different  
6 variable sets, are included in Supplemental Table 2.  
7  
8  
9  
10  
11  
12

### 13 **Temporal change of predictors of 30-day mortality and hospitalization**

14  
15  
16 The demographic, health, and contextual characteristics as well as hospital occupancy and  
17 testing capacity in each one-month interval after March 20, 2020 and before September 19,  
18 2020 are described in Figure 2 and 3 and Supplemental Table 3A and 3B. We observed  
19 substantial decline in percent of Black patients over time in both individuals with COVID-19  
20 (from 47.2% to 25.5%, dropping by 21.7%) and hospitalized individuals with COVID-19 (from  
21 54.4% to 28.2%, dropping by 26.3%). The prevalence of comorbidities was consistently  
22 dropping between the two period in individuals with COVID-19; the overall trend of comorbidity  
23 prevalence was still declining while less consistent in hospitalized individuals with COVID-19.  
24 In both of two cohorts, the percent of individuals living in disadvantaged neighborhood (higher  
25 ADI) and COVID-19 testing capacity were increasing over time, while hospital occupancy was  
26 decreasing.  
27  
28  
29  
30  
31  
32  
33  
34  
35  
36  
37  
38  
39  
40  
41

### 42 **The contribution of changes in predictors to temporal changes in 30-day mortality and** 43 **hospitalization rates**

44  
45  
46  
47 Decomposition analyses showed that from March 20, 2020 to September 19, 2020 and among  
48 COVID-19 positive individuals, changes in demographics, health characteristics, and  
49 contextual characteristics, expansion of testing capacity, and decreasing hospital occupancy  
50 contributed to 26.1%, 7.6%, 5.4%, -1.1%, and 2.2% of the decline in 30-day mortality rates  
51  
52  
53  
54  
55  
56  
57  
58  
59  
60

1  
2  
3 respectively. Altogether, these predictors accounted for 40.2% of the decline in 30-day  
4 mortality in Veterans with COVID-19 (Figure 4 and Supplemental Table 4).  
5  
6

7  
8 Changes in demographics, health characteristics, and contextual characteristics, and  
9 expansion of testing capacity, and decreasing hospital occupancy contributed to 19.6%, 9.0%,  
10 -0.6%, and 5.4% of the decline in hospitalization rates. Altogether, they accounted for 33.3% of  
11 the decline in hospitalization rates in Veterans with COVID-19 (Figure 4 and Supplemental  
12 Table 4).  
13  
14

15  
16 Among those hospitalized with COVID-19, changes in demographic, health characteristics,  
17 and contextual characteristics, expansion of testing capacity, and decreasing hospital  
18 occupancy accounted for 23.6%, 2.4%, -0.8%, 1.6%, and 3.1% of the decline in 30-day  
19 mortality rate respectively. All predictors collectively accounted for, 29.9% of the decline in 30-  
20 day mortality (Figure 4 and Supplemental Table 4).  
21  
22  
23  
24  
25  
26  
27  
28  
29  
30  
31  
32  
33  
34  
35

## 36 Discussion

37  
38 This analysis of temporal trends of COVID-19 hospitalization and mortality suggests  
39 substantial decline between March 2020 and September 2020. We also observed substantial  
40 shifts in the demographic and health characteristics of those who tested positive for COVID-19  
41 and in those who were hospitalized with a positive COVID-19 test including substantial decline  
42 in the percentage of Black people and comorbidity burden as well as increase in testing  
43 capacity and reduction in hospital occupancy rates. Around 40.2% of the decline in mortality  
44 rates and 33.3% of decline in hospitalization rates were explained by changes in the  
45 underlying characteristics of people who tested positive for COVID-19. Around 29.9% of the  
46  
47  
48  
49  
50  
51  
52  
53  
54  
55  
56  
57  
58  
59  
60

1  
2  
3 decline in mortality rates among hospitalized individuals was explained by changes in their  
4  
5 underlying characteristics.  
6  
7

8 Our analysis highlights the influence of individual-level demographic and health characteristics  
9  
10 on hospitalization and mortality rates in COVID-19. The contribution of changes in testing  
11  
12 capacity to these outcomes (albeit small) was measurable. The contribution of hospital  
13  
14 occupancy rates to decline in mortality rates also highlights the importance of this variable as  
15  
16 policy makers and health systems continue to optimize the public health response to this  
17  
18 pandemic and may also be useful in preparing for and mitigating impact of future pandemics.  
19  
20  
21

22 Slightly more than half of decline in rates was not predicted by the explanatory variables in our  
23  
24 models and likely reflects the influence of factors that are not accounted for in our approach  
25  
26 including improvement in medical care (to the extent that it may have influenced the  
27  
28 outcomes), a putative seasonality effect, and the potential influence of the broader public  
29  
30 health policy measures on these outcomes. In particular, it has been postulated that severity of  
31  
32 COVID-19 may be proportionate to the viral inoculum which initiates the infection in the human  
33  
34 host, and it is plausible that public health policies (e.g. physical distancing, masking, etc.) may  
35  
36 have reduced the viral inoculum in some infected individuals and might have consequently  
37  
38 resulted in less severe COVID-19 (and reduced hospitalization and mortality) – a hypothesis  
39  
40 referred to as the variolation of coronavirus<sup>29</sup>.  
41  
42  
43  
44  
45

46 Our findings provide insight not only into the dynamic changes of key indicators of the COVID-  
47  
48 19 pandemic (mortality and hospitalization rates), but also estimates of the influence of  
49  
50 individual and contextual parameters on these indicators. The synergistic influence of both  
51  
52 individual and contextual factors cannot be overstated<sup>30</sup>. The COVID-19 pandemic has brought  
53  
54 to prominence the complex interplay of several dynamic drivers including individual-level  
55  
56  
57  
58  
59

1  
2  
3 demographic and health characteristics, health system-level characteristics, the influence of  
4 socioeconomic factors, and the broader contextual reality in which people live (public health  
5 response, etc.) — all collectively shape the ultimate health outcomes of COVID-19. Continued  
6 effort to surveil temporal trends of key indicators of this global pandemic, and careful analysis  
7 of drivers of any temporal change is needed to inform ongoing effort to optimize the  
8 management of this so far unabated pandemic and to guide development of better mitigation  
9 plans for future pandemics.  
10  
11

12  
13  
14  
15  
16  
17  
18  
19  
20 While we investigated the temporal trends of COVID-19 mortality and hospitalization rates  
21 within the US Veteran population, some important differences between our cohort and the  
22 general US population are noteworthy to better contextualize the broader implications of our  
23 findings; in our cohort the median age was 63.6 years, the percentages of White and Black  
24 race were 60.6% and 33.9%, 11.5% were women, and 17.6% were current smokers; whereas  
25 the median age is 38.1 years, the percentages of White and Black race are 60.1% and 13.4%,  
26 50.8% are women, and 13.7% are current smokers in the US general population<sup>31 32</sup>.  
27  
28  
29  
30  
31  
32  
33  
34  
35

36  
37 A key strength of this analysis is the use of individual level data from the US Department of  
38 Veterans Affairs which operates the largest nationally integrated health care system in the US,  
39 and use of advanced methods to decompose the influence of changes in demographics and  
40 health characteristics on temporal trends. In addition to accounting for individual-level  
41 demographic and health characteristics, our analyses also account for contextual variables,  
42 testing capacity, and measures of hospital occupancy rates — as important determinants of  
43 outcomes in this pandemic.  
44  
45  
46  
47  
48  
49  
50  
51  
52

53 This analysis has several limitations. While we used validated definitions to identify covariates,  
54 we cannot completely rule out misclassification bias. While we accounted for known predictors,  
55  
56  
57  
58  
59

1  
2  
3 our analyses do not account for predictors that are not measured in the datasets including  
4 improvement in medical care as the pandemic progressed, and other unmeasured or unknown  
5 variables.  
6  
7  
8

9  
10 In sum, between March 2020 and September 2020, substantial decline in 30-day mortality and  
11 hospitalization among COVID-19 positive individuals and substantial decline in 30- day  
12 mortality among hospitalized Veterans with COVID-19. The temporal decline in these  
13 outcomes was partially explained by changes in underlying demographic, health, and  
14 contextual characteristics, and well as expansion of testing capacity, and reduction in hospital  
15 capacity. The results may be helpful in informing effort to optimize the collective public health  
16 response to this ongoing pandemic.  
17  
18  
19  
20  
21  
22  
23  
24  
25  
26  
27  
28  
29

### 30 **Author Contribution:**

31  
32  
33 *Concept and design:* All authors.  
34

35  
36 *Acquisition, analysis, or interpretation of data:* Cai, Bowe, Xie.  
37

38  
39 *Drafting of the manuscript:* Cai, Al-Aly.  
40

41  
42 *Critical revision of the manuscript for important intellectual content:* All authors.  
43

44  
45 *Statistical analysis:* Cai, Bowe, Xie.  
46

47  
48 *Supervision and funding:* Al-Aly.  
49

50  
51 **Conflict of Interest Disclosures:** None reported.  
52  
53  
54  
55  
56  
57  
58  
59  
60

**Funding:** This study was funded by the United States Department of Veterans Affairs (grant number 1I21HX002995-01A1).

**Role of the Funder/Sponsor:** The funders had no role in design and conduct of the study; collection, management, analysis, and interpretation of the data; preparation, review, or approval of the manuscript; and decision to submit the manuscript for publication.

**Reproducible Research Statement:** Study protocol and Statistical code: Available by request. Data set: Available to those who have access to the Department of Veteran Affairs data sets.

**Disclaimer:** The contents do not represent the views of the United States Department of Veterans Affairs or the United States government.

## References

1. Center for Disease Control and Prevention. COVIDView A Weekly Surveillance Summary of U.S. COVID-19 Activity: Center for Disease Control and Prevention; 2020 [Available from: <https://www.cdc.gov/coronavirus/2019-ncov/covid-data/covidview/index.html2020>].
2. Dennis J, McGovern A, Vollmer S, et al. Improving COVID-19 critical care mortality over time in England: A national cohort study, March to June 2020. *medRxiv* 2020
3. Horwitz L, Jones SA, Cerfolio RJ, et al. Trends in COVID-19 Risk-Adjusted Mortality Rates. *Journal of Hospital Medicine* 2020;15:E1-E3. doi: 10.12788/jhm.3552
4. Bowe B, Cai M, Xie Y, et al. Acute Kidney Injury in a National Cohort of Hospitalized US Veterans with COVID-19. *Clin J Am Soc Nephrol* 2020;16(1):14-25. doi: 10.2215/CJN.09610620 [published Online First: 2020/11/18]
5. United States Department of Veteran Affairs. COVID-19:Shared Data Resource 2020 [Available from: [https://vhacdwdwhweb100.vha.med.va.gov/phenotype/index.php/COVID-19:Shared\\_Data\\_Resource#Acknowledgements\\_COVID-19\\_Shared\\_Data\\_Resource](https://vhacdwdwhweb100.vha.med.va.gov/phenotype/index.php/COVID-19:Shared_Data_Resource#Acknowledgements_COVID-19_Shared_Data_Resource)].
6. Bowe B, Xie Y, Xian H, et al. Geographic Variation and US County Characteristics Associated With Rapid Kidney Function Decline. *Kidney Int Rep* 2017;2(1):5-17. doi: 10.1016/j.ekir.2016.08.016 [published Online First: 2016/08/30]
7. The Department of Veterans Affairs OoIT. Corporate Data Warehouse (CDW) 2014 [updated March 27, 2014. Available from: [https://www.hsrd.research.va.gov/for\\_researchers/vinci/cdw.cfm](https://www.hsrd.research.va.gov/for_researchers/vinci/cdw.cfm) accessed November 1 2019.
8. Xie Y, Bowe B, Li T, et al. Long-term kidney outcomes among users of proton pump inhibitors without intervening acute kidney injury. *Kidney Int* 2017;91(6):1482-94. doi: 10.1016/j.kint.2016.12.021 [published Online First: 2017/02/27]



- 1  
2  
3 9. Xie Y, Bowe B, Li TT, et al. Risk of death among users of Proton Pump Inhibitors: a longitudinal  
4 observational cohort study of United States veterans. *Bmj Open* 2017;7(6) doi: ARTN e015735  
5  
6 10.1136/bmjopen-2016-015735  
7 10. Bowe B, Xie Y, Li T, et al. Associations of ambient coarse particulate matter, nitrogen dioxide, and  
8 carbon monoxide with the risk of kidney disease: a cohort study. *Lancet Planet Health*  
9 2017;1(7):e267-e76. doi: 10.1016/S2542-5196(17)30117-1 [published Online First: 2018/06/01]  
10 11. Bowe B, Xie Y, Li T, et al. Particulate Matter Air Pollution and the Risk of Incident CKD and  
11 Progression to ESRD. *J Am Soc Nephrol* 2018;29(1):218-30. doi: 10.1681/ASN.2017030253  
12 [published Online First: 2017/09/25]  
13 12. Bowe B, Xie Y, Li T, et al. Estimates of the 2016 global burden of kidney disease attributable to  
14 ambient fine particulate matter air pollution. *Bmj Open* 2019;9(5):e022450. doi:  
15 10.1136/bmjopen-2018-022450  
16 13. Bowe B, Xie Y, Xian H, et al. Association between Monocyte Count and Risk of Incident CKD and  
17 Progression to ESRD. *Clin J Am Soc Nephrol* 2017;12(4):603-13. doi: 10.2215/CJN.09710916  
18 14. Bowe B, Xie Y, Yan Y, et al. Burden of Cause-Specific Mortality Associated With PM2.5 Air  
19 Pollution in the United States. *JAMA Netw Open* 2019;2(11):e1915834. doi:  
20 10.1001/jamanetworkopen.2019.15834 [published Online First: 2019/11/21]  
21 15. Xie Y, Bowe B, Li T, et al. Higher blood urea nitrogen is associated with increased risk of incident  
22 diabetes mellitus. *Kidney Int* 2018;93(3):741-52. doi: 10.1016/j.kint.2017.08.033 [published  
23 Online First: 2017/12/16]  
24 16. Xie Y, Bowe B, Yan Y, et al. Estimates of all cause mortality and cause specific mortality associated  
25 with proton pump inhibitors among US veterans: cohort study. *Bmj-Brit Med J* 2019;365 doi:  
26 ARTN I1580  
27  
28 10.1136/bmj.I1580  
29 17. Al-Aly Z, Maddukuri G, Xie Y. Proton Pump Inhibitors and the Kidney: Implications of Current  
30 Evidence for Clinical Practice and When and How to Deprescribe. *Am J Kidney Dis*  
31 2020;75(4):497-507. doi: 10.1053/j.ajkd.2019.07.012 [published Online First: 2019/10/14]  
32 18. Cai M, Xie Y, Bowe B, et al. Temporal Trends in Incidence Rates of Lower Extremity Amputation  
33 and Associated Risk Factors Among Patients Using Veterans Health Administration Services  
34 From 2008 to 2018. *JAMA Netw Open* 2021;4(1):e2033953. doi:  
35 10.1001/jamanetworkopen.2020.33953 [published Online First: 2021/01/23]  
36 19. Kind AJ, Buckingham WR. Making Neighborhood-Disadvantage Metrics Accessible—The  
37 Neighborhood Atlas. *New England Journal of Medicine* 2018;378(26):2456-58.  
38 20. Cai M, Liu E, Zhang R, et al. Comparing the Performance of Charlson and Elixhauser Comorbidity  
39 Indices to Predict In-Hospital Mortality Among a Chinese Population. *Clin Epidemiol*  
40 2020;12:307-16. doi: 10.2147/CLEP.S241610 [published Online First: 2020/04/08]  
41 21. Levey AS, Stevens LA. Estimating GFR using the CKD Epidemiology Collaboration (CKD-EPI)  
42 creatinine equation: more accurate GFR estimates, lower CKD prevalence estimates, and better  
43 risk predictions. *Am J Kidney Dis* 2010;55(4):622-7. doi: 10.1053/j.ajkd.2010.02.337 [published  
44 Online First: 2010/03/27]  
45 22. Xie Y, Bowe B, Gibson AK, et al. Comparative Effectiveness of SGLT2 Inhibitors, GLP-1 Receptor  
46 Agonists, DPP-4 Inhibitors, and Sulfonylureas on Risk of Kidney Outcomes: Emulation of a  
47 Target Trial Using Health Care Databases. *Diabetes Care* 2020;43(11):2859-69. doi:  
48 10.2337/dc20-1890 [published Online First: 2020/09/18]  
49 23. Xie Y, Bowe B, Gibson AK, et al. Comparative Effectiveness of the Sodium-Glucose Cotransporter  
50 2 Inhibitor Empagliflozin Versus Other Antihyperglycemics on Risk of Major Adverse Kidney  
51 Events. *Diabetes Care* 2020;43(11):2785-95. doi: 10.2337/dc20-1231 [published Online First:  
52 2020/09/12]  
53  
54  
55  
56  
57  
58  
59

- 1  
2  
3 24. Di Pino A, Scicali R, Calanna S, et al. Cardiovascular risk profile in subjects with prediabetes and  
4 new-onset type 2 diabetes identified by HbA(1c) according to American Diabetes Association  
5 criteria. *Diabetes Care* 2014;37(5):1447-53. doi: 10.2337/dc13-2357 [published Online First:  
6 2014/02/28]
- 7 25. Carey RM, Whelton PK, Committee AAHW. Prevention, Detection, Evaluation, and Management  
8 of High Blood Pressure in Adults: Synopsis of the 2017 American College of  
9 Cardiology/American Heart Association Hypertension Guideline. *Ann Intern Med*  
10 2018;168(5):351-58. doi: 10.7326/M17-3203 [published Online First: 2018/01/23]
- 11 26. Curtin LR, Klein RJ. Direct standardization (age-adjusted death rates): US Department of Health  
12 and Human Services, Public Health Service, Centers for Disease Control and Prevention,  
13 National Center for Health Statistics 1995.
- 14 27. Gupta PD. Standardization and decomposition of rates: a user's manual: US Department of  
15 Commerce, Economics and Statistics Administration, Bureau ... 1993.
- 16 28. R Core Team. R: A language and environment for statistical computing: Vienna, Austria, 2013.
- 17 29. Gandhi M, Rutherford GW. Facial Masking for Covid-19 - Potential for "Variolation" as We Await a  
18 Vaccine. *N Engl J Med* 2020;383(18):e101. doi: 10.1056/NEJMp2026913 [published Online  
19 First: 2020/09/09]
- 20 30. Xie Y, Bowe B, Maddukuri G, et al. Comparative evaluation of clinical manifestations and risk of  
21 death in patients admitted to hospital with covid-19 and seasonal influenza: cohort study. *BMJ*  
22 2020;371:m4677. doi: 10.1136/bmj.m4677 [published Online First: 2020/12/17]
- 23 31. Bowe B, Xie Y, Li T, et al. Changes in the US Burden of Chronic Kidney Disease From 2002 to  
24 2016: An Analysis of the Global Burden of Disease Study. *JAMA Netw Open*  
25 2018;1(7):e184412. doi: 10.1001/jamanetworkopen.2018.4412 [published Online First:  
26 2019/01/16]
- 27 32. Xie Y, Bowe B, Yan Y, et al. County-Level Contextual Characteristics and Disparities in Life  
28 Expectancy. *Mayo Clin Proc* 2021;96(1):92-104. doi: 10.1016/j.mayocp.2020.04.043 [published  
29 Online First: 2021/01/09]
- 30  
31  
32  
33  
34  
35  
36  
37  
38  
39  
40  
41  
42  
43  
44  
45  
46  
47  
48  
49  
50  
51  
52  
53  
54  
55  
56  
57  
58  
59  
60

**Table 1:** Characteristics of the individuals with COVID-19 and hospitalized individuals with COVID-19

| Characteristic                                         | Veterans with COVID-19 (N = 49238) | Hospitalized Veterans with COVID-19 (N = 9428) |
|--------------------------------------------------------|------------------------------------|------------------------------------------------|
| <b>Demographics</b>                                    |                                    |                                                |
| Age, median (IQR), year                                | 63.3 (49.8-73.1)                   | 70.6 (61.2-76.8)                               |
| Race, no. (%)                                          |                                    |                                                |
| White                                                  | 29814 (60.6)                       | 5054 (53.6)                                    |
| Black                                                  | 16714 (33.9)                       | 3809 (40.4)                                    |
| Other                                                  | 2710 ( 5.5)                        | 565 ( 6.0)                                     |
| Sex, no. (%), women                                    | 5673 (11.5)                        | 527 ( 5.6)                                     |
| <b>Health characteristics</b>                          |                                    |                                                |
| BMI category, no. (%)                                  |                                    |                                                |
| Underweight (<8.5 kg/m <sup>2</sup> )                  | 265 ( 0.5)                         | 83 ( 0.9)                                      |
| Normal weight (18.5 to <25 kg/m <sup>2</sup> )         | 9939 (20.2)                        | 1836 (19.5)                                    |
| Overweight (25 to <30 kg/m <sup>2</sup> )              | 15032 (30.5)                       | 2922 (31.0)                                    |
| Obesity (>18.5 kg/m <sup>2</sup> )                     | 24002 (48.7)                       | 4587 (48.7)                                    |
| Smoke, no. (%)                                         |                                    |                                                |
| Never smoker                                           | 27492 (55.8)                       | 4713 (50.0)                                    |
| Former smoker                                          | 13062 (26.5)                       | 2956 (31.4)                                    |
| Current smoker                                         | 8684 (17.6)                        | 1759 (18.7)                                    |
| Hypertension, no. (%)                                  | 30568 (62.1)                       | 6347 (67.3)                                    |
| Diabetes, no. (%)                                      | 13717 (27.9)                       | 3695 (39.2)                                    |
| Cancer, no. (%)                                        | 4558 ( 9.3)                        | 1443 (15.3)                                    |
| Cardiovascular disease, no. (%)                        | 10399 (21.1)                       | 3417 (36.2)                                    |
| Cerebrovascular disease, no. (%)                       | 5192 (10.5)                        | 1836 (19.5)                                    |
| Dementia, no. (%)                                      | 5350 (10.9)                        | 1953 (20.7)                                    |
| Chronic kidney disease, no. (%)                        | 9573 (21.9)                        | 3042 (34.9)                                    |
| Peripheral artery disease, no. (%)                     | 1411 ( 2.9)                        | 543 ( 5.8)                                     |
| HIV, no. (%)                                           | 504 ( 1.0)                         | 141 ( 1.5)                                     |
| Pneumonia, no. (%)                                     | 765 ( 1.6)                         | 336 ( 3.6)                                     |
| COPD, no. (%)                                          | 7666 (15.6)                        | 2429 (25.8)                                    |
| <b>Contextual factors</b>                              |                                    |                                                |
| ADI rank category, no. (%)                             |                                    |                                                |
| 0 to 33.3                                              | 10248 (20.8)                       | 1785 (18.9)                                    |
| 33.4 to 66.6                                           | 20861 (42.4)                       | 3643 (38.6)                                    |
| 66.7 to 100                                            | 18129 (36.8)                       | 4000 (42.4)                                    |
| <b>Testing capacity</b>                                |                                    |                                                |
| COVID-19 testing capacity, mean (SD), per 10000 people | 3.1 (1.9)                          | 2.8 (1.8)                                      |
| <b>Hospital occupancy</b>                              |                                    |                                                |
| Hospital occupancy, mean (SD), %                       | 37.0 (10.8)                        | 38.1 (10.5)                                    |

ADI: area deprivation index; COPD: Chronic obstructive pulmonary disease; eGFR: Estimated Glomerular Filtration Rate; HIV: Human immunodeficiency virus; IQR: interquartile range; IQR: interquartile range; SD: standard deviation.

**Table 2** 30-day mortality and hospitalization rates in US veterans by 30-day periods, March 20, 2020 to September 19, 2020

| Periods                  | Total number of COVID-19 patients | 30-day mortality, n (%) | Hospitalization, n (%) | 30-day mortality among hospitalized COVID-19 patients, n (%) |
|--------------------------|-----------------------------------|-------------------------|------------------------|--------------------------------------------------------------|
| March 20 - April 19      | 5896                              | 13.6%                   | 33.8%                  | 23.5%                                                        |
| April 20 - May 19        | 6685                              | 12.3%                   | 17.2%                  | 17.0%                                                        |
| May 20 - June 19         | 4824                              | 7.1%                    | 20.0%                  | 12.6%                                                        |
| June 20 - July 19        | 13084                             | 4.9%                    | 17.4%                  | 11.8%                                                        |
| July 20 - August 19      | 11874                             | 5.2%                    | 15.8%                  | 11.1%                                                        |
| August 20 - September 19 | 6875                              | 4.4%                    | 17.0%                  | 10.8%                                                        |
| <b>Overall</b>           | <b>49238</b>                      | <b>7.2%</b>             | <b>19.1%</b>           | <b>14.8%</b>                                                 |

**Table 3** Odd ratios (95% confidence intervals) of predictors associated with 30-day mortality and hospitalization among Veterans and hospitalized Veterans with COVID-19

| Characteristics                                 | Veterans with COVID-19 |                   | Hospitalized Veterans with COVID-19 |
|-------------------------------------------------|------------------------|-------------------|-------------------------------------|
|                                                 | 30-day mortality       | Hospitalization   | 30-day mortality                    |
| <b>Demographics</b>                             |                        |                   |                                     |
| Age                                             | 1.08 (1.07, 1.08)      | 1.02 (1.02, 1.02) | 1.06 (1.06, 1.07)                   |
| Race (reference = white)                        |                        |                   |                                     |
| Black                                           | 1.11 (1.01, 1.22)      | 1.64 (1.56, 1.74) | 1.03 (0.90, 1.18)                   |
| Other                                           | 1.33 (1.12, 1.58)      | 1.58 (1.42, 1.76) | 1.20 (0.92, 1.57)                   |
| Sex, women (reference = men)                    | 0.52 (0.40, 0.67)      | 0.74 (0.67, 0.82) | 0.72 (0.47, 1.06)                   |
| <b>Health characteristics</b>                   |                        |                   |                                     |
| BMI category (reference = normal weight)        |                        |                   |                                     |
| Underweight (< 18.5 kg/m <sup>2</sup> )         | 1.03 (0.64, 1.59)      | 1.26 (0.92, 1.71) | 0.67 (0.29, 1.38)                   |
| Overweight (25 to < 30 kg/m <sup>2</sup> )      | 0.89 (0.80, 1.00)      | 0.98 (0.91, 1.06) | 1.07 (0.90, 1.29)                   |
| Obesity (> 18.5 kg/m <sup>2</sup> )             | 1.02 (0.92, 1.15)      | 1.05 (0.98, 1.13) | 1.24 (1.03, 1.49)                   |
| Smoking status (reference = never smoker)       |                        |                   |                                     |
| Former smoker                                   | 1.15 (1.05, 1.25)      | 1.01 (0.96, 1.07) | 1.11 (0.97, 1.28)                   |
| Current smoker                                  | 1.12 (0.99, 1.27)      | 1.11 (1.03, 1.19) | 1.21 (1.00, 1.46)                   |
| Hypertension                                    | 0.87 (0.80, 0.94)      | 1.10 (1.04, 1.16) | 0.81 (0.70, 0.92)                   |
| Diabetes                                        | 1.37 (1.26, 1.49)      | 1.23 (1.16, 1.29) | 1.15 (1.00, 1.31)                   |
| Cancer                                          | 1.10 (0.99, 1.22)      | 1.36 (1.27, 1.47) | 1.03 (0.88, 1.21)                   |
| Cardiovascular disease                          | 1.17 (1.07, 1.27)      | 1.43 (1.35, 1.52) | 1.15 (1.00, 1.31)                   |
| Cerebrovascular disease                         | 1.09 (0.98, 1.20)      | 1.38 (1.29, 1.48) | 1.04 (0.90, 1.21)                   |
| Dementia                                        | 1.81 (1.65, 2.00)      | 1.52 (1.41, 1.63) | 1.37 (1.18, 1.59)                   |
| Chronic kidney disease                          | 1.48 (1.36, 1.61)      | 1.27 (1.20, 1.35) | 1.47 (1.28, 1.68)                   |
| Peripheral arterial disease                     | 1.09 (0.92, 1.29)      | 1.31 (1.16, 1.48) | 1.17 (0.92, 1.47)                   |
| HIV                                             | 1.05 (0.67, 1.58)      | 1.50 (1.22, 1.85) | 1.23 (0.71, 2.03)                   |
| Pneumonia                                       | 1.44 (1.15, 1.80)      | 2.00 (1.71, 2.35) | 1.22 (0.90, 1.62)                   |
| COPD                                            | 1.21 (1.10, 1.32)      | 1.40 (1.31, 1.49) | 0.96 (0.83, 1.11)                   |
| <b>Contextual factors</b>                       |                        |                   |                                     |
| ADI rank (reference = 1-33.2)                   |                        |                   |                                     |
| 33.3 to 66.6                                    | 0.99 (0.89, 1.10)      | 1.03 (0.96, 1.10) | 0.94 (0.79, 1.11)                   |
| 66.7 to 100                                     | 1.04 (0.93, 1.16)      | 1.16 (1.09, 1.25) | 0.92 (0.77, 1.09)                   |
| <b>COVID-19 testing capacity</b>                |                        |                   |                                     |
| COVID-19 testing capacity (per 10,000 veterans) | 0.92 (0.90, 0.94)      | 0.95 (0.94, 0.96) | 0.90 (0.86, 0.93)                   |
| <b>Hospital occupancy</b>                       |                        |                   |                                     |
| Hospital occupancy rate (an increase of 10%)    | 1.05 (1.01, 1.08)      | Not included      | 1.08 (1.02, 1.15)                   |
| <i>C-statistics</i>                             | 0.834                  | 0.718             | 0.746                               |

ADI: area deprivation index; COPD: Chronic obstructive pulmonary disease; eGFR: Estimated Glomerular Filtration Rate; HIV: Human immunodeficiency virus.

## Figure Legends:

**Figure 1. Temporal trends of COVID-19 30-day mortality and hospitalization among US Veterans. A and B: 30-day mortality and hospitalization rates in US Veterans who had a positive COVID-19 test (N=29,528). C: 30-day mortality rate in hospitalized US Veterans with a positive COVID-19 test (N=6,449).** Fully standardized rates were adjusted for, demographics (age, race, gender), health characteristics (smoking status, body weight index, cancer, cardiovascular disease, chronic kidney disease, dementia, diabetes mellitus type 2, human immunodeficiency virus, hypertension, peripheral artery disease, pneumonia, and stroke), contextual factors (area deprivation index), COVID-19 testing capacity, and hospital occupancy.

**Figure 2 The change in predictors of 30-day mortality and hospitalization among US Veterans with COVID-19 between 3/20–4/19, 2020 and 8/20–9/19, 2020.** The yellow dots represent the prevalence of predictors in 3/20–4/19, 2020, while the green dots represent the prevalence of predictors in 8/20–9/19, 2020. In the delta column, blue text indicates that the change of predictor leads to decrease in mortality and hospitalization rates, while red text indicates the change of predictor leads to increase in mortality and hospitalization rates. COPD: chronic obstructive pulmonary disease.

**Figure 3 The change in predictors of 30-day mortality among hospitalized US Veterans with COVID-19 between 3/20–4/19, 2020 and 8/20–9/19, 2020.** The yellow dots represent the prevalence of predictors in 3/20–4/19, 2020, while the green dots represent the prevalence of predictors in 8/20–9/19, 2020. In the  $\Delta$  column, the blue text indicates that the change of predictor leads to decrease in mortality rates, while the red text indicates the change of predictor leads to increase in mortality rates. COPD: chronic obstructive pulmonary disease.

**Figure 4 The contribution of changes in demographics, health characteristics, testing capacity, hospital occupancy, and contextual factors, and epidemiological changes to changes in 30-day mortality and hospitalization rates between 3/20–4/19, 2020 and 8/20–9/19, 2020.** The red dot represents the observed change in rate of outcomes between the two periods, and the blue dot represents the change predicted based on demographics, health, contextual characteristics, COVID-19 testing capacity, and hospital occupancy. Hospital occupancy is not considered as predictor for the hospitalization outcome model. Epidemiological changes collectively represent the difference between predicted and observed rates and reflect the summative contribution of factors that are not accounted for in prediction models.

### 30-day mortality rates among US Veterans with a positive COVID-19 test

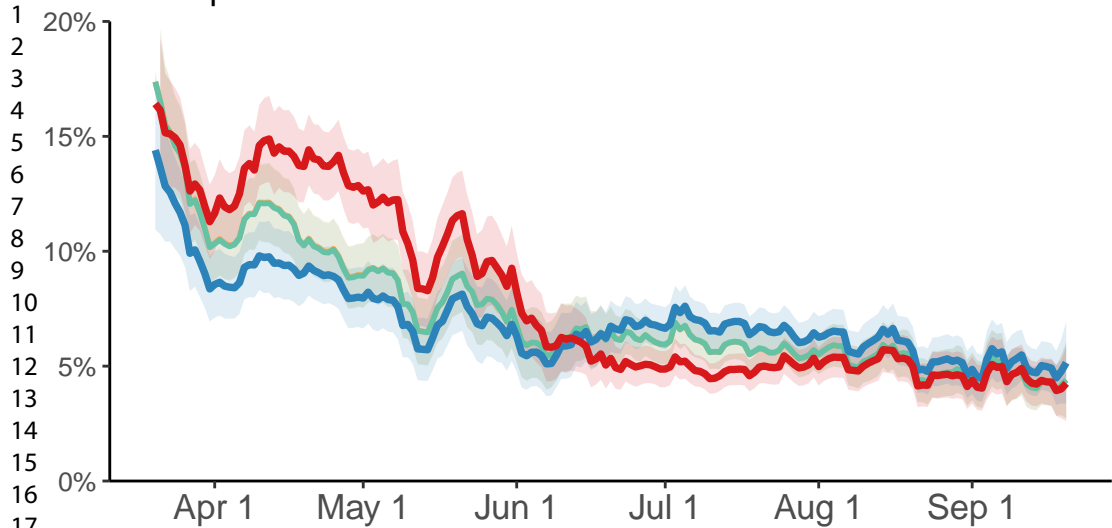

### Hospitalization rates among US Veterans with a positive COVID-19 test

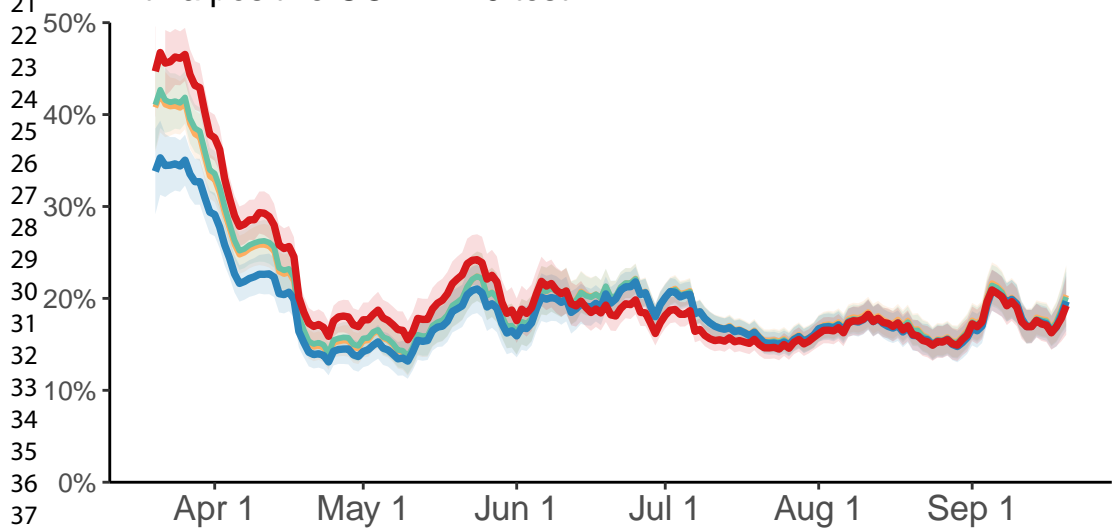

### 30-day mortality rates among hospitalized US Veterans with a positive COVID-19 test

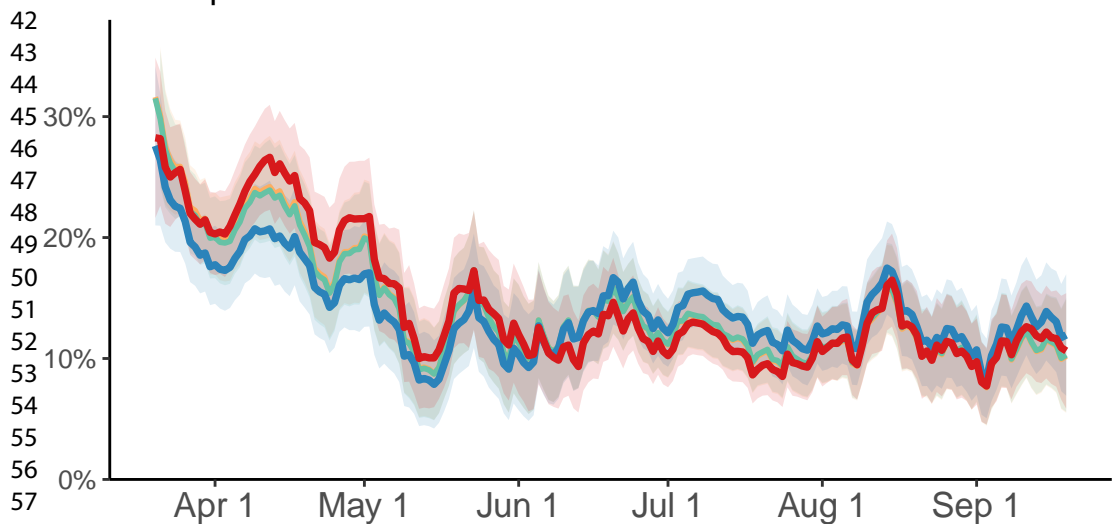

■ Crude      ■ Age, race, gender, and ADI standardized  
■ Fully standardized      ■ Age, race, gender standardized

BMJ Open

Aug 20 – Sep 19 Mar 20 – Apr 19

Demographics

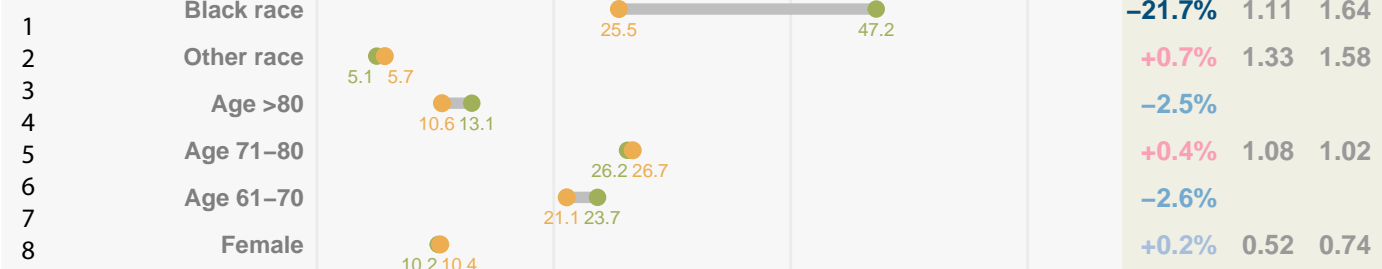

Health characteristics

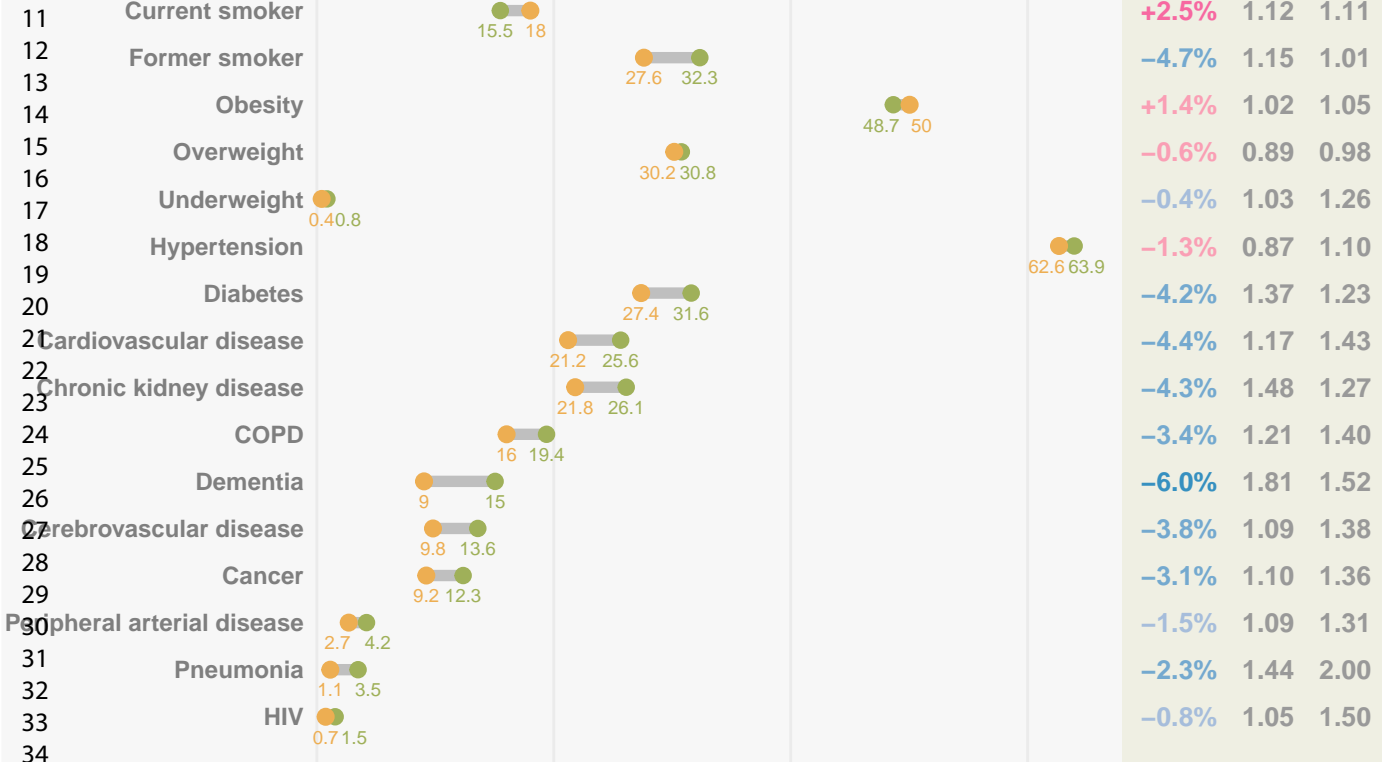

Contextual factor

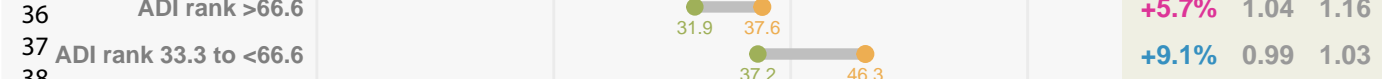

Testing capacity

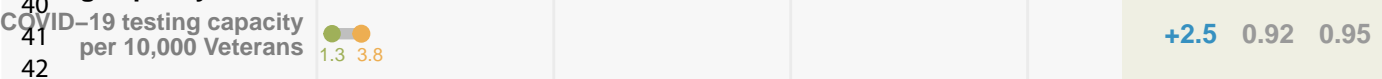

Hospital Occupancy

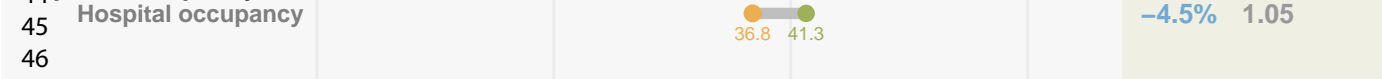



Demographics



Health characteristics



Contextual factor



Testing capacity



Hospital Occupancy



1 30-day mortality rate change in  
 2 Veterans with COVID-19  
 3  
 4  
 5  
 6  
 7 Hospitalization rate change in  
 8 Veterans with COVID-19  
 9  
 10  
 11  
 12  
 13  
 14  
 15 30-day mortality rate change in  
 16 hospitalized Veterans with COVID-19  
 17  
 18  
 19  
 20  
 21

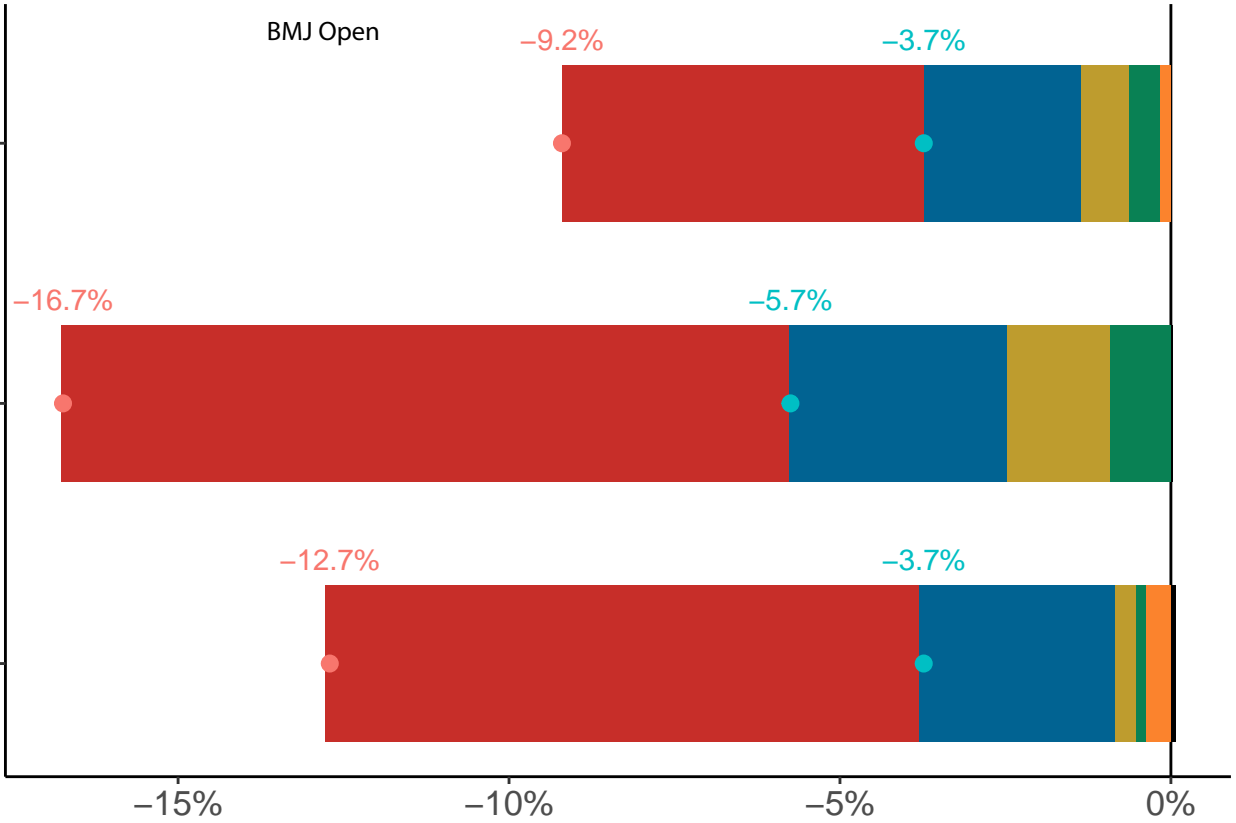

Contextual characteristics
  Hospital occupancy
  Testing capacity  
 Health characteristics
  Demographics
  Epidemiological change

**Supplemental material**

|                                                                                                                                                                                            |            |
|--------------------------------------------------------------------------------------------------------------------------------------------------------------------------------------------|------------|
| <b>Table of Contents</b>                                                                                                                                                                   |            |
| <b>Supplemental Table 1</b> Health care resource utilization among hospitalized Veterans with COVID-19                                                                                     | <b>2</b>   |
| <b>Supplemental Table 2:</b> C statistics (95% confidence intervals) for nested models using different combination of predictors                                                           | <b>3</b>   |
| <b>Supplemental Table 3A</b> Characteristics of US Veterans with COVID-19 overall and by different month periods                                                                           | <b>4-5</b> |
| <b>Supplemental Table 3B</b> Characteristics of hospitalized US Veterans with COVID-19 overall and by different month periods                                                              | <b>6-7</b> |
| <b>Supplemental Table 4</b> Contribution of changes in demographic, health, and contextual characteristics to temporal differences in outcomes between 3/20–4/19, 2020 and 6/20–7/20, 2020 | <b>8</b>   |

**Supplemental Table 1** Health care resource utilization among hospitalized Veterans with COVID-19

| <b>Month</b>             | <b>ICU</b>   | <b>Mechanical Ventilation</b> | <b>LOS</b>  |
|--------------------------|--------------|-------------------------------|-------------|
| March 20 - April 19      | 35.6%        | 20.6%                         | 13.8        |
| April 20 - May 19        | 31.0%        | 13.5%                         | 16.2        |
| May 20 - June 19         | 31.2%        | 11.4%                         | 12.1        |
| June 20 - July 19        | 29.7%        | 11.7%                         | 11.4        |
| July 20 - August 19      | 28.2%        | 11.2%                         | 11          |
| August 20 - September 19 | 31.6%        | 9.3%                          | 9.6         |
| <b>Overall</b>           | <b>31.2%</b> | <b>13.4%</b>                  | <b>12.3</b> |

ICU: intensive care units; LOS: length of stay.

**Supplemental Table 2:** C statistics (95% confidence intervals) for nested models using different combination of predictors

| Cohort                      | Veterans with COVID-19 |                     | Hospitalized Veterans with COVID-19 |
|-----------------------------|------------------------|---------------------|-------------------------------------|
|                             | 30-day mortality       | Hospitalization     | 30-day mortality                    |
| Predictor variables         |                        |                     |                                     |
| Demographics                | 0.822 (0.816-0.828)    | 0.678 (0.673-0.684) | 0.725 (0.712-0.738)                 |
| + health characteristics    | 0.832 (0.826-0.838)    | 0.713 (0.707-0.719) | 0.740 (0.726-0.753)                 |
| + contextual factors        | 0.832 (0.826-0.838)    | 0.714 (0.708-0.720) | 0.741 (0.726-0.754)                 |
| + COVID-19 testing capacity | 0.834 (0.828-0.840)    | 0.715 (0.709-0.721) | 0.745 (0.730-0.758)                 |
| + hospital occupancy        | 0.834 (0.828-0.841)    | 0.718 (0.712-0.723) | 0.746 (0.732-0.759)                 |

Each + indicates including all the variable above that row. For example, "+ contextual factors" indicates including demographics, health characteristics, and contextual factors as predictors.

| <b>Supplemental Table 3A: Characteristics of US Veterans with COVID-19 overall and by different month periods</b> |                              |                                             |                                           |                                          |                                            |                                              |                                                  |
|-------------------------------------------------------------------------------------------------------------------|------------------------------|---------------------------------------------|-------------------------------------------|------------------------------------------|--------------------------------------------|----------------------------------------------|--------------------------------------------------|
| <b>Characteristic</b>                                                                                             | <b>Overall<br/>N = 49238</b> | <b>March 20 –<br/>April 19<br/>N = 5896</b> | <b>April 20 –<br/>May 19<br/>N = 6685</b> | <b>May 20 –<br/>June 19<br/>N = 4824</b> | <b>June 20 –<br/>July 19<br/>N = 13084</b> | <b>July 20 –<br/>August 19<br/>N = 11874</b> | <b>August 20 –<br/>September 19<br/>N = 6875</b> |
| Age, median (IQR), year                                                                                           | 63.3<br>(49.8-73.1)          | 65.3<br>(53.7-73.8)                         | 68.0<br>(56.6-76.1)                       | 63.9<br>(50.0-73.4)                      | 59.6<br>(44.7- 71.4)                       | 62.9<br>(49.6-72.8)                          | 64.3<br>(50.2-73.3)                              |
| Race, no. (%)                                                                                                     |                              |                                             |                                           |                                          |                                            |                                              |                                                  |
| White                                                                                                             | 29814 (60.6)                 | 2814 (47.7)                                 | 3908 (58.5)                               | 2877 (59.6)                              | 7991 (61.1)                                | 7496 (63.1)                                  | 4728 (68.8)                                      |
| Black                                                                                                             | 16714 (33.9)                 | 2784 (47.2)                                 | 2492 (37.3)                               | 1693 (35.1)                              | 4272 (32.7)                                | 3720 (31.3)                                  | 1753 (25.5)                                      |
| Other                                                                                                             | 2710 ( 5.5)                  | 298 ( 5.1)                                  | 285 ( 4.3)                                | 254 ( 5.3)                               | 821 ( 6.3)                                 | 658 ( 5.5)                                   | 394 ( 5.7)                                       |
| Sex, no. (%), women                                                                                               | 5673 (11.5)                  | 604 (10.2)                                  | 693 (10.4)                                | 557 (11.5)                               | 1671 (12.8)                                | 1432 (12.1)                                  | 716 (10.4)                                       |
| BMI category, no. (%)                                                                                             |                              |                                             |                                           |                                          |                                            |                                              |                                                  |
| Underweight (<8.5 kg/m <sup>2</sup> )                                                                             | 265 ( 0.5)                   | 50 ( 0.8)                                   | 56 ( 0.8)                                 | 38 ( 0.8)                                | 49 ( 0.4)                                  | 44 ( 0.4)                                    | 28 ( 0.4)                                        |
| Normal weight (18.5 to <25 kg/m <sup>2</sup> )                                                                    | 9939 (20.2)                  | 1163 (19.7)                                 | 1645 (24.6)                               | 1018 (21.1)                              | 2508 (19.2)                                | 2272 (19.1)                                  | 1333 (19.4)                                      |
| Overweight (25 to <30 kg/m <sup>2</sup> )                                                                         | 15032 (30.5)                 | 1814 (30.8)                                 | 2030 (30.4)                               | 1521 (31.5)                              | 4025 (30.8)                                | 3568 (30.0)                                  | 2074 (30.2)                                      |
| Obesity (>18.5 kg/m <sup>2</sup> )                                                                                | 24002 (48.7)                 | 2869 (48.7)                                 | 2954 (44.2)                               | 2247 (46.6)                              | 6502 (49.7)                                | 5990 (50.4)                                  | 3440 (50.0)                                      |
| Smoke, no. (%)                                                                                                    |                              |                                             |                                           |                                          |                                            |                                              |                                                  |
| Never smoker                                                                                                      | 27492 (55.8)                 | 3077 (52.2)                                 | 3411 (51.0)                               | 2624 (54.4)                              | 7799 (59.6)                                | 6843 (57.6)                                  | 3738 (54.4)                                      |
| Former smoker                                                                                                     | 13062 (26.5)                 | 1906 (32.3)                                 | 2027 (30.3)                               | 1292 (26.8)                              | 2965 (22.7)                                | 2974 (25.0)                                  | 1898 (27.6)                                      |
| Current smoker                                                                                                    | 8684 (17.6)                  | 913 (15.5)                                  | 1247 (18.7)                               | 908 (18.8)                               | 2320 (17.7)                                | 2057 (17.3)                                  | 1239 (18.0)                                      |
| Hypertension, no. (%)                                                                                             | 30568 (62.1)                 | 3769 (63.9)                                 | 4077 (61.0)                               | 2993 (62.0)                              | 8052 (61.5)                                | 7370 (62.1)                                  | 4307 (62.6)                                      |
| Diabetes, no. (%)                                                                                                 | 13717 (27.9)                 | 1863 (31.6)                                 | 1996 (29.9)                               | 1360 (28.2)                              | 3301 (25.2)                                | 3315 (27.9)                                  | 1882 (27.4)                                      |
| Cancer, no. (%)                                                                                                   | 4558 ( 9.3)                  | 728 (12.3)                                  | 695 (10.4)                                | 443 ( 9.2)                               | 1043 ( 8.0)                                | 1014 ( 8.5)                                  | 635 ( 9.2)                                       |
| Cardiovascular disease, no. (%)                                                                                   | 10399 (21.1)                 | 1512 (25.6)                                 | 1706 (25.5)                               | 1048 (21.7)                              | 2307 (17.6)                                | 2368 (19.9)                                  | 1458 (21.2)                                      |
| Cerebrovascular disease, no. (%)                                                                                  | 5192 (10.5)                  | 801 (13.6)                                  | 1011 (15.1)                               | 503 (10.4)                               | 1091 ( 8.3)                                | 1112 ( 9.4)                                  | 674 ( 9.8)                                       |
| Dementia, no. (%)                                                                                                 | 5350 (10.9)                  | 887 (15.0)                                  | 1268 (19.0)                               | 586 (12.1)                               | 988 ( 7.6)                                 | 999 ( 8.4)                                   | 622 ( 9.0)                                       |
| Chronic kidney disease, no. (%)                                                                                   | 9573 (21.9)                  | 1390 (26.1)                                 | 1477 (26.2)                               | 963 (22.9)                               | 2161 (18.4)                                | 2237 (20.9)                                  | 1345 (21.8)                                      |
| Peripheral artery disease, no. (%)                                                                                | 1411 ( 2.9)                  | 247 ( 4.2)                                  | 261 ( 3.9)                                | 140 ( 2.9)                               | 301 ( 2.3)                                 | 277 ( 2.3)                                   | 185 ( 2.7)                                       |
| HIV, no. (%)                                                                                                      | 504 ( 1.0)                   | 91 ( 1.5)                                   | 75 ( 1.1)                                 | 58 ( 1.2)                                | 130 ( 1.0)                                 | 99 ( 0.8)                                    | 51 ( 0.7)                                        |
| Pneumonia, no. (%)                                                                                                | 765 ( 1.6)                   | 205 ( 3.5)                                  | 191 ( 2.9)                                | 83 ( 1.7)                                | 108 ( 0.8)                                 | 100 ( 0.8)                                   | 78 ( 1.1)                                        |
| COPD, no. (%)                                                                                                     | 7666 (15.6)                  | 1143 (19.4)                                 | 1285 (19.2)                               | 765 (15.9)                               | 1670 (12.8)                                | 1702 (14.3)                                  | 1101 (16.0)                                      |
| ADI rank category, no. (%)                                                                                        |                              |                                             |                                           |                                          |                                            |                                              |                                                  |
| 0 to 33.3                                                                                                         | 10248 (20.8)                 | 1816 (30.8)                                 | 2003 (30.0)                               | 1026 (21.3)                              | 2356 (18.0)                                | 1944 (16.4)                                  | 1103 (16.0)                                      |

|   |                                                                                                                                                                                                                                           |              |             |             |             |             |             |             |
|---|-------------------------------------------------------------------------------------------------------------------------------------------------------------------------------------------------------------------------------------------|--------------|-------------|-------------|-------------|-------------|-------------|-------------|
| 1 | 33.4 to 66.6                                                                                                                                                                                                                              | 20861 (42.4) | 2203 (37.4) | 2594 (38.8) | 1967 (40.8) | 5788 (44.2) | 5113 (43.1) | 3196 (46.5) |
| 2 | 66.7 to 100                                                                                                                                                                                                                               | 18129 (36.8) | 1877 (31.8) | 2088 (31.2) | 1831 (38.0) | 4940 (37.8) | 4817 (40.6) | 2576 (37.5) |
| 3 | COVID-19 testing capacity,<br>4 mean (SD),<br>5 per 10000 people                                                                                                                                                                          | 3.1 (1.9)    | 1.3 (0.9)   | 1.7 (1.0)   | 2.1 (1.2)   | 4.1 (2.1)   | 3.7 (1.6)   | 3.8 (1.7)   |
| 6 | Hospital occupancy,<br>7 mean (SD), %                                                                                                                                                                                                     | 37.0 (10.8)  | 41.3 (11.8) | 35.4 (9.9)  | 35.8 (10.2) | 36.5 (10.3) | 37.0 (10.5) | 36.8 (11.5) |
| 8 | ADI: area deprivation index; COPD: Chronic obstructive pulmonary disease; eGFR: Estimated Glomerular Filtration Rate; HIV: Human<br>9 immunodeficiency virus; IQR: interquartile range; IQR: interquartile range; SD: standard deviation. |              |             |             |             |             |             |             |

For peer review only

| <b>Supplemental Table 3B: Characteristics of hospitalized US Veterans with COVID-19 overall and by different month periods</b> |                             |                                             |                                           |                                         |                                           |                                             |                                                  |
|--------------------------------------------------------------------------------------------------------------------------------|-----------------------------|---------------------------------------------|-------------------------------------------|-----------------------------------------|-------------------------------------------|---------------------------------------------|--------------------------------------------------|
| <b>Characteristic</b>                                                                                                          | <b>Overall<br/>N = 9428</b> | <b>March 20 –<br/>April 19<br/>N = 1992</b> | <b>April 20 –<br/>May 19<br/>N = 1152</b> | <b>May 20 –<br/>June 19<br/>N = 966</b> | <b>June 20 –<br/>July 19<br/>N = 2274</b> | <b>July 20 –<br/>August 19<br/>N = 1872</b> | <b>August 20 –<br/>September 19<br/>N = 1172</b> |
| Age, median (IQR), year                                                                                                        | 70.6<br>(61.2-76.8)         | 70.7<br>(61.8, 76.7)                        | 72.2<br>(63.7-79.3)                       | 69.7<br>(59.7- 76.8)                    | 69.1<br>(58.9-75.6)                       | 70.8<br>(61.1-76.5)                         | 71.5<br>(62.3-77.2)                              |
| Race, no. (%)                                                                                                                  |                             |                                             |                                           |                                         |                                           |                                             |                                                  |
| White                                                                                                                          | 5054 (53.6)                 | 811 (40.7)                                  | 607 (52.7)                                | 533 (55.2)                              | 1255 (55.2)                               | 1081 (57.7)                                 | 767 (65.4)                                       |
| Black                                                                                                                          | 3809 (40.4)                 | 1084 (54.4)                                 | 496 (43.1)                                | 389 (40.3)                              | 861 (37.9)                                | 649 (34.7)                                  | 330 (28.2)                                       |
| Other                                                                                                                          | 565 ( 6.0)                  | 97 ( 4.9)                                   | 49 ( 4.3)                                 | 44 ( 4.6)                               | 158 ( 6.9)                                | 142 ( 7.6)                                  | 75 ( 6.4)                                        |
| Sex, no. (%), women                                                                                                            | 527 ( 5.6)                  | 95 ( 4.8)                                   | 53 ( 4.6)                                 | 73 ( 7.6)                               | 147 ( 6.5)                                | 112 ( 6.0)                                  | 47 ( 4.0)                                        |
| BMI category, no. (%)                                                                                                          |                             |                                             |                                           |                                         |                                           |                                             |                                                  |
| Underweight (<8.5 kg/m <sup>2</sup> )                                                                                          | 83 ( 0.9)                   | 24 ( 1.2)                                   | 14 ( 1.2)                                 | 10 ( 1.0)                               | 18 ( 0.8)                                 | 12 ( 0.6)                                   | 5 ( 0.4)                                         |
| Normal weight (18.5 to <25 kg/m <sup>2</sup> )                                                                                 | 1836 (19.5)                 | 387 (19.4)                                  | 276 (24.0)                                | 182 (18.8)                              | 423 (18.6)                                | 350 (18.7)                                  | 218 (18.6)                                       |
| Overweight (25 to <30 kg/m <sup>2</sup> )                                                                                      | 2922 (31.0)                 | 611 (30.7)                                  | 344 (29.9)                                | 322 (33.3)                              | 684 (30.1)                                | 582 (31.1)                                  | 379 (32.3)                                       |
| Obesity (>18.5 kg/m <sup>2</sup> )                                                                                             | 4587 (48.7)                 | 970 (48.7)                                  | 518 (45.0)                                | 452 (46.8)                              | 1149 (50.5)                               | 928 (49.6)                                  | 570 (48.6)                                       |
| Smoke, no. (%)                                                                                                                 |                             |                                             |                                           |                                         |                                           |                                             |                                                  |
| Never smoker                                                                                                                   | 4713 (50.0)                 | 913 (45.8)                                  | 511 (44.4)                                | 474 (49.1)                              | 1250 (55.0)                               | 980 (52.4)                                  | 585 (49.9)                                       |
| Former smoker                                                                                                                  | 2956 (31.4)                 | 766 (38.5)                                  | 409 (35.5)                                | 283 (29.3)                              | 607 (26.7)                                | 535 (28.6)                                  | 356 (30.4)                                       |
| Current smoker                                                                                                                 | 1759 (18.7)                 | 313 (15.7)                                  | 232 (20.1)                                | 209 (21.6)                              | 417 (18.3)                                | 357 (19.1)                                  | 231 (19.7)                                       |
| Hypertension, no. (%)                                                                                                          | 6347 (67.3)                 | 1345 (67.5)                                 | 763 (66.2)                                | 649 (67.2)                              | 1546 (68.0)                               | 1264 (67.5)                                 | 780 (66.6)                                       |
| Diabetes, no. (%)                                                                                                              | 3695 (39.2)                 | 798 (40.1)                                  | 473 (41.1)                                | 386 (40.0)                              | 856 (37.6)                                | 715 (38.2)                                  | 467 (39.8)                                       |
| Cancer, no. (%)                                                                                                                | 1443 (15.3)                 | 346 (17.4)                                  | 169 (14.7)                                | 150 (15.5)                              | 328 (14.4)                                | 261 (13.9)                                  | 189 (16.1)                                       |
| Cardiovascular disease, no. (%)                                                                                                | 3417 (36.2)                 | 735 (36.9)                                  | 453 (39.3)                                | 338 (35.0)                              | 773 (34.0)                                | 674 (36.0)                                  | 444 (37.9)                                       |
| Cerebrovascular disease, no. (%)                                                                                               | 1836 (19.5)                 | 403 (20.2)                                  | 279 (24.2)                                | 179 (18.5)                              | 399 (17.5)                                | 328 (17.5)                                  | 248 (21.2)                                       |
| Dementia, no. (%)                                                                                                              | 1953 (20.7)                 | 420 (21.1)                                  | 345 (29.9)                                | 212 (21.9)                              | 398 (17.5)                                | 336 (17.9)                                  | 242 (20.6)                                       |
| Chronic kidney disease, no. (%)                                                                                                | 3042 (34.9)                 | 704 (37.8)                                  | 368 (35.9)                                | 293 (33.2)                              | 716 (33.7)                                | 575 (33.3)                                  | 386 (35.5)                                       |
| Peripheral artery disease, no. (%)                                                                                             | 543 ( 5.8)                  | 127 ( 6.4)                                  | 87 ( 7.6)                                 | 59 ( 6.1)                               | 120 ( 5.3)                                | 92 ( 4.9)                                   | 58 ( 4.9)                                        |
| HIV, no. (%)                                                                                                                   | 141 ( 1.5)                  | 44 ( 2.2)                                   | 16 ( 1.4)                                 | 12 ( 1.2)                               | 40 ( 1.8)                                 | 23 ( 1.2)                                   | 6 ( 0.5)                                         |
| Pneumonia, no. (%)                                                                                                             | 336 ( 3.6)                  | 104 ( 5.2)                                  | 59 ( 5.1)                                 | 37 ( 3.8)                               | 51 ( 2.2)                                 | 50 ( 2.7)                                   | 35 ( 3.0)                                        |
| COPD, no. (%)                                                                                                                  | 2429 (25.8)                 | 524 (26.3)                                  | 311 (27.0)                                | 251 (26.0)                              | 549 (24.1)                                | 462 (24.7)                                  | 332 (28.3)                                       |
| ADI rank category, no. (%)                                                                                                     |                             |                                             |                                           |                                         |                                           |                                             |                                                  |
| 0 to 33.3                                                                                                                      | 1785 (18.9)                 | 583 (29.3)                                  | 290 (25.2)                                | 169 (17.5)                              | 335 (14.7)                                | 249 (13.3)                                  | 159 (13.6)                                       |
| 33.4 to 66.6                                                                                                                   | 3643 (38.6)                 | 671 (33.7)                                  | 454 (39.4)                                | 383 (39.6)                              | 904 (39.8)                                | 733 (39.2)                                  | 498 (42.5)                                       |
| 66.7 to 100                                                                                                                    | 4000 (42.4)                 | 738 (37.0)                                  | 408 (35.4)                                | 414 (42.9)                              | 1035 (45.5)                               | 890 (47.5)                                  | 515 (43.9)                                       |



|                                                                                                                                                                                                            |             |             |            |            |            |             |             |
|------------------------------------------------------------------------------------------------------------------------------------------------------------------------------------------------------------|-------------|-------------|------------|------------|------------|-------------|-------------|
| COVID-19 testing capacity,<br>mean (SD),<br>per 10000 people                                                                                                                                               | 2.8 (1.8)   | 1.2 (0.9)   | 1.6 (0.8)  | 2.1 (1.1)  | 3.9 (1.5)  | 3.8 (1.4)   | 4.0 (1.7)   |
| Hospital occupancy,<br>mean (SD), %                                                                                                                                                                        | 38.1 (10.5) | 42.4 (11.3) | 35.0 (9.7) | 36.1 (8.9) | 38.1 (9.4) | 37.1 (10.4) | 37.0 (10.6) |
| ADI: area deprivation index; COPD: Chronic obstructive pulmonary disease; eGFR: Estimated Glomerular Filtration Rate; HIV: Human immunodeficiency virus; IQR: interquartile range; SD: standard deviation. |             |             |            |            |            |             |             |

For peer review only

**Supplemental Table 4** Contribution of changes in demographic, health, and contextual characteristics to temporal differences in outcomes between 3/20–4/19, 2020 and 6/20–7/20, 2020

| Factors                                                                                                                              | Among Veterans with COVID-19  |                                                           |                              |                                                           | Among hospitalized Veterans with COVID-19 |                                                           |
|--------------------------------------------------------------------------------------------------------------------------------------|-------------------------------|-----------------------------------------------------------|------------------------------|-----------------------------------------------------------|-------------------------------------------|-----------------------------------------------------------|
|                                                                                                                                      | 30-day mortality rate changes |                                                           | Hospitalization rate changes |                                                           | 30-day mortality rate changes             |                                                           |
|                                                                                                                                      | Predicted rate of change      | Percent contribution to total change (predicted/observed) | Predicted rate of change     | Percent contribution to total change (predicted/observed) | Predicted rate of change                  | Percent contribution to total change (predicted/observed) |
| Demographics                                                                                                                         | -2.4%                         | 26.1%                                                     | -3.3%                        | 19.6%                                                     | -3.0%                                     | 23.6%                                                     |
| Health characteristics                                                                                                               | -0.7%                         | 7.6%                                                      | -1.5%                        | 9.0%                                                      | -0.3%                                     | 2.4%                                                      |
| Contextual characteristics                                                                                                           | 0.1%                          | -1.1%                                                     | 0.1%                         | -0.6%                                                     | 0.1%                                      | -0.8%                                                     |
| COVID-19 testing capacity                                                                                                            | -0.5%                         | 5.4%                                                      | -0.9%                        | 5.4%                                                      | -0.2%                                     | 1.6%                                                      |
| Hospital occupancy                                                                                                                   | -0.2%                         | 2.2%                                                      |                              |                                                           | -0.4%                                     | 3.1%                                                      |
| <b>Net rate of change predicted by demographic, health, contextual characteristics, testing capacity, and hospital occupancy (A)</b> | <b>-3.7%</b>                  | <b>40.2%</b>                                              | <b>-5.6%</b>                 | <b>33.3%</b>                                              | <b>-3.8%</b>                              | <b>29.9%</b>                                              |
| Observed rate of change (B)                                                                                                          | -9.2%                         |                                                           | -16.8%                       |                                                           | -12.7%                                    |                                                           |
| Epidemiological change (difference between observed and net predicted rate of change) (B)-(A)                                        | -5.5%                         | 59.8%                                                     | -11.2%                       | 66.7%                                                     | -8.9%                                     | 70.1%                                                     |

Demographics include age, race, and gender; Health characteristics include BMI, diabetes, cancer, cardiovascular disease, cerebrovascular disease, chronic kidney disease, dementia, HIV, hypertension, peripheral artery disease, pneumonia, and smoking status; contextual factors include ADI; epidemiological change includes the 30-day periods of testing positive dates.

## STROBE Statement—checklist of items that should be included in reports of observational studies

|                              | Page | Recommendation                                                                                                                                                                                                                                                                                                                                                                                                                                                                                                                                                                                                                                                                                   |
|------------------------------|------|--------------------------------------------------------------------------------------------------------------------------------------------------------------------------------------------------------------------------------------------------------------------------------------------------------------------------------------------------------------------------------------------------------------------------------------------------------------------------------------------------------------------------------------------------------------------------------------------------------------------------------------------------------------------------------------------------|
| <b>Title and abstract</b>    | 1    | (a) Indicate the study's design with a commonly used term in the title or the abstract<br>(b) Provide in the abstract an informative and balanced summary of what was done and what was found                                                                                                                                                                                                                                                                                                                                                                                                                                                                                                    |
| <b>Introduction</b>          |      |                                                                                                                                                                                                                                                                                                                                                                                                                                                                                                                                                                                                                                                                                                  |
| Background/rationale         | 4    | Explain the scientific background and rationale for the investigation being reported                                                                                                                                                                                                                                                                                                                                                                                                                                                                                                                                                                                                             |
| Objectives                   | 4    | State specific objectives, including any prespecified hypotheses                                                                                                                                                                                                                                                                                                                                                                                                                                                                                                                                                                                                                                 |
| <b>Methods</b>               |      |                                                                                                                                                                                                                                                                                                                                                                                                                                                                                                                                                                                                                                                                                                  |
| Study design                 | 4    | Present key elements of study design early in the paper                                                                                                                                                                                                                                                                                                                                                                                                                                                                                                                                                                                                                                          |
| Setting                      | 4    | Describe the setting, locations, and relevant dates, including periods of recruitment, exposure, follow-up, and data collection                                                                                                                                                                                                                                                                                                                                                                                                                                                                                                                                                                  |
| Participants                 | 5    | (a) <i>Cohort study</i> —Give the eligibility criteria, and the sources and methods of selection of participants. Describe methods of follow-up<br><i>Case-control study</i> —Give the eligibility criteria, and the sources and methods of case ascertainment and control selection. Give the rationale for the choice of cases and controls<br><i>Cross-sectional study</i> —Give the eligibility criteria, and the sources and methods of selection of participants<br>(b) <i>Cohort study</i> —For matched studies, give matching criteria and number of exposed and unexposed<br><i>Case-control study</i> —For matched studies, give matching criteria and the number of controls per case |
| Variables                    | 6    | Clearly define all outcomes, exposures, predictors, potential confounders, and effect modifiers. Give diagnostic criteria, if applicable                                                                                                                                                                                                                                                                                                                                                                                                                                                                                                                                                         |
| Data sources/<br>measurement | 5    | For each variable of interest, give sources of data and details of methods of assessment (measurement). Describe comparability of assessment methods if there is more than one group                                                                                                                                                                                                                                                                                                                                                                                                                                                                                                             |
| Bias                         | 5    | Describe any efforts to address potential sources of bias                                                                                                                                                                                                                                                                                                                                                                                                                                                                                                                                                                                                                                        |
| Study size                   | 9    | Explain how the study size was arrived at                                                                                                                                                                                                                                                                                                                                                                                                                                                                                                                                                                                                                                                        |
| Quantitative variables       | 6-7  | Explain how quantitative variables were handled in the analyses. If applicable, describe which groupings were chosen and why                                                                                                                                                                                                                                                                                                                                                                                                                                                                                                                                                                     |
| Statistical methods          | 7-8  | (a) Describe all statistical methods, including those used to control for confounding<br>(b) Describe any methods used to examine subgroups and interactions<br>(c) Explain how missing data were addressed<br>(d) <i>Cohort study</i> —If applicable, explain how loss to follow-up was addressed<br><i>Case-control study</i> —If applicable, explain how matching of cases and controls was addressed<br><i>Cross-sectional study</i> —If applicable, describe analytical methods taking account of sampling strategy<br>(e) Describe any sensitivity analyses                                                                                                                                |

Continued on next page

1  
2  
3  
4  
5  
6  
7  
8  
9  
10  
11  
12  
13  
14  
15  
16  
17  
18  
19  
20  
21  
22  
23  
24  
25  
26  
27  
28  
29  
30  
31  
32  
33  
34  
35  
36  
37  
38  
39  
40  
41  
42  
43  
44  
45  
46  
47  
48  
49  
50  
51  
52  
53  
54  
55  
56  
57  
58  
59  
60**Results**

|                  |    |                                                                                                                                                                                                                                                                                                                                                                                                               |
|------------------|----|---------------------------------------------------------------------------------------------------------------------------------------------------------------------------------------------------------------------------------------------------------------------------------------------------------------------------------------------------------------------------------------------------------------|
| Participants     | 9  | (a) Report numbers of individuals at each stage of study—eg numbers potentially eligible, examined for eligibility, confirmed eligible, included in the study, completing follow-up, and analysed<br>(b) Give reasons for non-participation at each stage<br>(c) Consider use of a flow diagram                                                                                                               |
| Descriptive data | 9  | (a) Give characteristics of study participants (eg demographic, clinical, social) and information on exposures and potential confounders<br>(b) Indicate number of participants with missing data for each variable of interest<br>(c) <i>Cohort study</i> —Summarise follow-up time (eg, average and total amount)                                                                                           |
| Outcome data     | 9  | <i>Cohort study</i> —Report numbers of outcome events or summary measures over time<br><i>Case-control study</i> —Report numbers in each exposure category, or summary measures of exposure<br><i>Cross-sectional study</i> —Report numbers of outcome events or summary measures                                                                                                                             |
| Main results     | 10 | (a) Give unadjusted estimates and, if applicable, confounder-adjusted estimates and their precision (eg, 95% confidence interval). Make clear which confounders were adjusted for and why they were included<br>(b) Report category boundaries when continuous variables were categorized<br>(c) If relevant, consider translating estimates of relative risk into absolute risk for a meaningful time period |
| Other analyses   | 10 | Report other analyses done—eg analyses of subgroups and interactions, and sensitivity analyses                                                                                                                                                                                                                                                                                                                |

**Discussion**

|                  |    |                                                                                                                                                                            |
|------------------|----|----------------------------------------------------------------------------------------------------------------------------------------------------------------------------|
| Key results      | 12 | Summarise key results with reference to study objectives                                                                                                                   |
| Limitations      | 14 | Discuss limitations of the study, taking into account sources of potential bias or imprecision. Discuss both direction and magnitude of any potential bias                 |
| Interpretation   | 14 | Give a cautious overall interpretation of results considering objectives, limitations, multiplicity of analyses, results from similar studies, and other relevant evidence |
| Generalisability | 14 | Discuss the generalisability (external validity) of the study results                                                                                                      |

**Other information**

|         |    |                                                                                                                                                               |
|---------|----|---------------------------------------------------------------------------------------------------------------------------------------------------------------|
| Funding | 15 | Give the source of funding and the role of the funders for the present study and, if applicable, for the original study on which the present article is based |
|---------|----|---------------------------------------------------------------------------------------------------------------------------------------------------------------|

\*Give information separately for cases and controls in case-control studies and, if applicable, for exposed and unexposed groups in cohort and cross-sectional studies.

**Note:** An Explanation and Elaboration article discusses each checklist item and gives methodological background and published examples of transparent reporting. The STROBE checklist is best used in conjunction with this article (freely available on the Web sites of PLoS Medicine at <http://www.plosmedicine.org/>, Annals of Internal Medicine at <http://www.annals.org/>, and Epidemiology at <http://www.epidem.com/>). Information on the STROBE Initiative is available at [www.strobe-statement.org](http://www.strobe-statement.org).
